# Supplementary material for: The impact of economic austerity and prosperity events on suicide in Greece: a 30-year interrupted time-series analysis
Source: PubMed Central journal article supplement — BMJ Open. 2015 Jan 16;5(1):e005619. doi: 10.1136/bmjopen-2014-005619 (PMC4316557; doi:10.1136/bmjopen-2014-005619), 2015-01-16
Supplement: bmjopen-2014-005619.draft_revisions.pdf [file bmjopen-2014-005619.draft_revisions.pdf]

# BMJ Open

## The impact of economic austerity and prosperity on suicide in Greece: a 30-year time-series analysis

|                                 |                                                                                                                                                                                                                                                                                                                                                                                                                                                                                                                                                                                       |
|---------------------------------|---------------------------------------------------------------------------------------------------------------------------------------------------------------------------------------------------------------------------------------------------------------------------------------------------------------------------------------------------------------------------------------------------------------------------------------------------------------------------------------------------------------------------------------------------------------------------------------|
| Journal:                        | <i>BMJ Open</i>                                                                                                                                                                                                                                                                                                                                                                                                                                                                                                                                                                       |
| Manuscript ID:                  | bmjopen-2014-005619                                                                                                                                                                                                                                                                                                                                                                                                                                                                                                                                                                   |
| Article Type:                   | Research                                                                                                                                                                                                                                                                                                                                                                                                                                                                                                                                                                              |
| Date Submitted by the Author:   | 06-May-2014                                                                                                                                                                                                                                                                                                                                                                                                                                                                                                                                                                           |
| Complete List of Authors:       | Branas, Charles; University of Pennsylvania, ; University of Otago, Kastanaki, Anastasia; University of Crete, Faculty of Medicine Michalodimitrakis, Manolis; University of Crete, Forensic Pathology Tzougas, John; Hellenic Statistical Authority, Director General Kranioti, Elena; University of Edinburgh, Forensic Anthropology Theodorakis, Pavlos; Attica Mental Health Hospitals Trust, WHO National Counterpart for Mental Health Carr, Brendan; University of Pennsylvania, Emergency Medicine Wiebe, Douglas; University of Pennsylvania, Biostatistics and Epidemiology |
| <b>Primary Subject Heading</b>: | Health policy                                                                                                                                                                                                                                                                                                                                                                                                                                                                                                                                                                         |
| Secondary Subject Heading:      | Global health, Epidemiology, Public health                                                                                                                                                                                                                                                                                                                                                                                                                                                                                                                                            |
| Keywords:                       | PUBLIC HEALTH, FORENSIC MEDICINE, Health & safety < HEALTH SERVICES ADMINISTRATION & MANAGEMENT, Health policy < HEALTH SERVICES ADMINISTRATION & MANAGEMENT, MENTAL HEALTH, JOURNALISM (see Medical Journalism)                                                                                                                                                                                                                                                                                                                                                                      |
|                                 |                                                                                                                                                                                                                                                                                                                                                                                                                                                                                                                                                                                       |

SCHOLARONE™  
Manuscripts

only

1  
2  
3 **The impact of economic austerity and prosperity on suicide in Greece: a 30-year**  
4 **time-series analysis**  
5  
6

7 Charles C. Branas, PhD  
8 Professor of Epidemiology, University of Pennsylvania  
9 Philadelphia, USA  
10 cbranas@upenn.edu  
11

12  
13 Anastasia E. Kastanaki, PhD  
14 Clinical Psychologist, Faculty of Medicine, University of Crete  
15 Iraklion, Greece  
16 ankastanaki@yahoo.gr  
17

18  
19 Manolis Michalodimitrakis, MD, JD  
20 Professor of Forensic Pathology, University of Crete  
21 Iraklion, Greece  
22 michalom2@gmail.com  
23

24  
25 John Tzougas, PhD  
26 Director General of the Hellenic Statistical Authority, Hellenic Statistical Authority  
27 Piraeus, Greece  
28 jotzo@otenet.gr  
29

30  
31 Elena F. Kranioti, MD, PhD  
32 Lecturer, Forensic Anthropology, University of Edinburgh  
33 Edinburgh, United Kingdom  
34 elena.kranioti@ed.ac.uk  
35

36  
37 Pavlos N. Theodorakis, MD, PhD  
38 CEO and Chairman of Attica Mental Health Hospitals Trust, WHO National Counterpart for  
39 Mental Health  
40 Athens, Greece  
41 theodorakispavlos@gmail.com  
42  
43

44  
45 Brendan G. Carr, MD, MA, MS  
46 Assistant Professor of Emergency Medicine, University of Pennsylvania  
47 Philadelphia, USA  
48 carrb@mail.med.upenn.edu  
49

50  
51 Douglas J. Wiebe, PhD  
52 Associate Professor of Epidemiology, University of Pennsylvania  
53 Philadelphia, USA  
54 dwiebe@mail.med.upenn.edu  
55  
56  
57  
58  
59  
60

1  
2  
3 Corresponding author contact information:

4 Charles C. Branas, PhD  
5 Professor of Epidemiology  
6 University of Pennsylvania  
7 Department of Biostatistics and Epidemiology  
8 Blockley Hall, 423 Guardian Drive  
9 Philadelphia, PA 19104-6021 USA  
10 Email: cbranas@upenn.edu  
11  
12  
13

14 Contributorship statement

15 Each author listed contributed to the research and the final document and each author  
16 fulfilled all three of the ICMJE guidelines for authorship: 1) substantial contributions to  
17 conception and design, acquisition of data, or analysis and interpretation of data; 2)  
18 drafting the article or revising it critically for important intellectual content; and 3) final  
19 approval of the version to be published.  
20  
21

22 The Corresponding Author has the right to grant on behalf of all authors and does grant on  
23 behalf of all authors, an exclusive license (or non exclusive for government employees) on a  
24 worldwide basis to the BMJ Publishing Group Ltd to permit this article (if accepted) to be  
25 published in BMJ editions and any other BMJ PGL products and sublicenses such use and  
26 exploit all subsidiary rights, as set out in our license.  
27  
28

29 The authors have no competing interests.  
30  
31

32 All authors have completed the Unified Competing Interest form and declare: no support  
33 from any organization for the submitted work; no financial relationships with any  
34 organizations that might have an interest in the submitted work in the previous three  
35 years, and no other relationships or activities that could appear to have influenced the  
36 submitted work.  
37  
38

39 Transparency declaration: the lead author (the manuscript's guarantor) affirms that the  
40 manuscript is an honest, accurate, and transparent account of the study being reported;  
41 that no important aspects of the study have been omitted; and that any discrepancies from  
42 the study as planned (and, if relevant, registered) have been explained.  
43  
44

45 Data sharing statement: No additional data available.  
46  
47

48 Funding for the conduct of this study provided by the University of Athens Collaborative  
49 Center for Clinical Epidemiology and Outcomes Research (CLEO) and the Stavros Niarchos  
50 Foundation. All co-authors were independent of these funders.  
51  
52

53 Key words: economic policy, mental health, suicide, injury, time-series  
54  
55  
56  
57  
58  
59  
60

## The impact of economic austerity and prosperity on suicide in Greece: a 30-year time-series analysis

### Abstract

#### Objectives

To complete a 30-year interrupted time-series analysis of the impact of austerity-related events on the occurrence of suicide across Greece. To also compare the impact of prosperity-related events on suicide across Greece over the same period and investigate suicide under-reporting.

#### Setting

Greece from January 1, 1983 to December 31, 2012.

#### Participants

A total of 11,505 suicides, 9,079 by men and 2,426 by women, occurring in Greece over the study period.

#### Primary and secondary outcomes

National data from the Hellenic Statistical Authority assembled as 360 monthly counts of: all suicides, male suicides, female suicides, and all suicides plus potentially misclassified suicides.

#### Results

In 30 years, the highest months of Greek suicide occurred in 2012. The passage of new austerity measures in June 2011 marked the beginning of significant, abrupt and sustained increases in total suicides (+34.7%,  $p < 0.001$ ) and male suicides (+18.3%,  $p < 0.001$ ). Sensitivity analyses that figured in under-counting of suicides also found a significant, abrupt and sustained increase in June 2011 (+20.5%,  $p < 0.001$ ). Greek male suicides also underwent a significant, abrupt and sustained increase in October 2008 when the Greek recession began (+13.9%,  $p < 0.001$ ), and an abrupt but temporary increase in April 2012 following a public suicide committed in response to austerity conditions (+29.8%,  $p < 0.05$ ). Greek female suicides also underwent an abrupt and sustained increase in May 2011 following austerity-related events (+35.8%,  $p < 0.05$ ). No prosperity-related events significantly impacted suicides.

#### Conclusions

This is the first multi-decade, national analysis of Greek suicide using monthly data. Select austerity-related events in Greece corresponded to statistically significant increases for suicides overall, as well as for suicides among Greek men and women. Limitations of the current study are discussed. The consideration of future austerity measures should give greater weight to the unintended mental health consequences of these measures and public reporting of any subsequent suicide-related events.

## Strengths and limitations of this study

### Strengths include:

- The first multi-decade, national analysis of Greek suicide using monthly data
- The first analysis of Greek suicide incorporating the latest official data from 2012
- The first robust statistical time-series tests of specific prosperity and austerity-related events on Greek suicide (and not simply yearly analyses of general trends)
- The first robust statistical time-series tests of the abrupt effects of *both* prosperity and austerity-related events on suicide
- The first statistical tests and findings concerning the effect of austerity-related media and press coverage on suicides in Greece
- The first time-series study of suicide to include a sensitivity analyses that figures in under-counting and misclassification of suicides

### Limitations include:

- The absence of nonfatal self-directed injuries in our analysis
- Our analysis of Greek female suicides proceeded with relatively small numbers per month
- The significant shifts that we identified may have been related to the austerity measures themselves or could have been related to different, but unmeasured, events that happened in the same months as our interruptions

## Introduction

The ongoing global economic crisis is the worst since the Great Depression<sup>1,2</sup> and Greece is thought to have been more affected than any other European country.<sup>3</sup> Numerous academic articles and commentaries have been published in recent years speculating about the impact of recent economic austerity measures in Greece.<sup>1,3-5</sup> These austerity measures followed numerous economic inconsistencies in the national finances of the Greek state that have been viewed as a foundational economic crisis affecting the European economy and, by extension, the world economy.

The weight of this crisis situation and the Greek austerity measures have been highly publicized around the world. Not surprisingly, this publicity and the toxic economic conditions accompanying the austerity measures – high unemployment, inflation, etc. – have also become *the* leading source of public consternation in Greece itself, exacting considerable stress and strain on the Greek public.<sup>1,4</sup> Everyday citizens in Greece face the crisis on a continuous basis and their local media outlets discuss little else. National debt reduction strategies and new austerity measures are publicly, and often abruptly, announced and then followed by large demonstrations, labor strikes, riots, and police actions.

The strain on the Greek public that has persisted for several years now has prompted academic discussion of the potential health effects of the austerity measures. In this regard, fluctuations in Greek suicide have been a lead topic of discussion, with numerous commentators concluding that the recent austerity measures have indeed led to increased suicides in Greece. This conclusion has, however, been appropriately met with skepticism<sup>6,7,37</sup> and no large-scale, systematic longitudinal analysis has yet been completed to inform the ongoing debate as to whether austerity measures have led to statistically higher suicide rates in Greece.<sup>4,6-9</sup> To help fill this gap, we undertook a 30-year interrupted time-series analysis of several large and highly publicized austerity-related events and the monthly occurrence of suicide across Greece. For comparison, we also considered the impact of prosperity-related events and suicide across Greece over the same time period and investigated the potential bias of suicide under-reporting on our analyses.

## Methods

### Mortality data

We analyzed suicides that occurred in Greece from January 1, 1983 to December 31, 2012. Data were assembled as monthly counts of all suicides and monthly counts of suicide separately for males and females. Suicide counts were obtained from death certificates of Greek residents that occurred in Greece over the study period. We included all suicide deaths, regardless of age, since younger individuals who committed suicide, in having the capacity to act to take their own life, also likely had the capacity to perceive how they, individuals they knew, or Greeks generally were impacted by the country's economic situation.

National suicide data were provided by the Hellenic Statistical Authority (ELSTAT), an independent statistical authority that is legislatively charged with safeguarding and

1  
2  
3 continuously improving the quality of Greece's national statistics and data.<sup>10</sup> The ELSTAT  
4 follows European and international standards of statistical practice and data collection.<sup>11</sup>  
5 These data represented suicides from all mechanisms (ICD9 E-codes E950-E958) and have  
6 been used in past yearly suicide analyses in Greece; our annual suicide counts matched  
7 those reported in these past suicide analyses.<sup>4,7,12</sup>  
8  
9

10 In Greece, violent deaths, accidents, and suspected suicides prompt investigative and data  
11 collection protocols involving police, local coroners, and public prosecutors. These legal  
12 authorities are obliged to perform inquiries and order autopsies by forensic medical  
13 doctors at state hospitals.<sup>13</sup> Greek death certificates must be completed before burial,  
14 despite forensic investigations that may still be ongoing. Because of this, first-line medical  
15 causes of death (or so-called R-codes, ICD-10, R00-R99) are occasionally used as  
16 placeholder diagnoses on death certificates<sup>14,15</sup> until the final cause of death (i.e., accident,  
17 suicide or homicide) can be amended following further investigation.<sup>16</sup>  
18  
19  
20

21 Despite these standard procedures, analyses of death certificate data are subject to bias  
22 that can result from inaccurately recorded causes of death. Prior studies have pointed to  
23 the misclassification of suicide as a source of bias for national analyses in numerous  
24 countries, including Greece.<sup>17-19</sup> Intentional (to avoid stigma) and unintentional (inability  
25 to determine victim intent) reasons may drive under-reporting of suicide in Greece.<sup>12</sup> In  
26 particular, the Greek Orthodox Church considers suicide a major sin and condemns suicide  
27 victims to be interred without a burial service.<sup>12,20</sup> This has caused some to contend that  
28 Greek suicide rates are among the lowest in Europe partly because of under-reporting and  
29 misclassification for religious reasons.<sup>12,21</sup>  
30  
31  
32

33 Given this potential for misclassification, we performed a sensitivity analysis based on  
34 prior work, including a comparison of official suicide mortality statistics from ELSTAT and  
35 validated coroner death certificate data for the same suicides at the regional level (the  
36 Island of Crete).<sup>22</sup> Discrepancies between the two sources indicated that suicidal  
37 poisonings, falls, drownings, and hangings likely represented the vast majority of  
38 potentially misclassified suicides. All misclassification of suicides were under-counts; in no  
39 mechanism of suicide category was there over-counting. Remaining mechanisms of suicide  
40 were either very infrequently under-counted (i.e., firearm suicides) or very small in  
41 number (i.e., cutting/piercing suicides) and excluded from further sensitivity analyses.  
42  
43  
44

45 Having determined potentially misclassified mechanisms of suicide in our data, we then  
46 obtained monthly counts of deaths due to accidental poisonings, falls, drownings, and  
47 suffocations (ICD9 E-codes E850-869, 880-888, 910-915) from ELSTAT. Based on the prior  
48 comparison of official suicide statistics and validated coroner data at the regional level, we  
49 created a new time series where the event counts in each month were calculated as total  
50 recorded suicides across Greece plus 17.6% of all potentially misclassified accidental  
51 deaths by poisonings, falls, drownings, and suffocations across Greece. This 17.6%  
52 inflation of national suicides maintained the monthly variability in potentially misclassified  
53 accidental deaths, while increasing the average suicides per month to correspond with the  
54 overall misclassification rate found at the regional level.  
55  
56  
57  
58  
59  
60

1  
2  
3 Thus, our final working data were comprised of four separate time series: (1) all suicides,  
4 (2) male suicides, (3) female suicides, and (4) all suicides plus potentially misclassified  
5 suicides. Each of these time-series had 360 monthly observations in time over a 30-year  
6 study period.  
7

### 8 9 Austerity and prosperity interruptions-in-time

10 We searched news media archives and other publications to identify substantial and highly  
11 publicized austerity-related events and prosperity-related events that occurred in Greece  
12 during the study period and that could be hypothesized to cause an increase or decrease in  
13 suicide.<sup>1,3,23-28</sup> These involved well-publicized official economic events by government or  
14 other authorities (e.g., passing of legislation, announcements of new government  
15 measures, etc.) and highly publicized events by citizens in response to economic events  
16 (e.g., strikes, protests, riots, public suicide, etc.). A total of 12 such events were identified  
17 from January 1983 to December 2012. Each event was represented in the working dataset  
18 as a separate time series variable coded 0 for each month before the event occurred and  
19 coded 1 for the month the event occurred and each month thereafter (i.e., a step variable).  
20 This allowed us to treat each event as an interruption-in-time for our analyses. Based on  
21 these events we also defined a separate prosperity period from September 1997 to August  
22 2004 and a corresponding austerity period from October 2008 to December 2012.  
23  
24  
25  
26

### 27 Statistical analyses

28 We first completed visual inspections and descriptive analyses of the four time series, the  
29 interruptions-in-time, and the austerity and prosperity periods. Descriptive analyses  
30 included the calculations of means, standard deviations, linear trends and unpaired two-  
31 sided t-tests (assuming unequal variances).  
32  
33  
34

35 We then conducted an interrupted time series analysis using autoregressive integrated  
36 moving average (ARIMA) models and transfer functions to test the hypothesized impact of  
37 each austerity and prosperity interruption on suicide in Greece. Separately for each of our  
38 four time series, this modeling involved identifying the ARIMA model that best fit the time  
39 series and then testing each interruption variable with three commonly used transfer  
40 functions. To do this we applied a zero-order transfer function to a step variable, a first-  
41 order transfer function to a step variable, and a first-order transfer function to a  
42 differenced step variable (i.e., a pulse variable coded 1 for the month the event occurred  
43 and coded 0 for all other months). This approach allowed us to investigate the form of a  
44 given hypothesized interruption and whether it was associated with: (1) an abrupt and  
45 sustained, (2) a gradual and sustained, or (3) an abrupt but temporary, increase or  
46 decrease in the monthly counts of suicide (see Appendix). As the modeling procedure was  
47 carried out, we retained any intervention variable in our models if the p-value on its  
48 parameter was  $p < 0.05$ . After the modeling was completed, however, we used  $p < 0.01$  as the  
49 critical value for assessing the statistical significance of the effect estimates for the  
50 parameters that had been retained in the final models. This was done to account for  
51 multiple testing biases given the large number of events that were investigated as  
52 interruptions in four separate suicide time series.  
53  
54  
55  
56  
57  
58  
59  
60



1  
2  
3  
4  
5  
6  
7  
8  
9  
10  
11  
12  
13  
14  
15  
16  
17  
18  
19  
20  
21  
22  
23  
24  
25  
26  
27  
28  
29  
30  
31  
32  
33  
34  
35  
36  
37  
38  
39  
40  
41  
42  
43  
44  
45  
46  
47  
48  
49  
50  
51  
52  
53  
54  
55  
56  
57  
58  
59  
60

As part of the ARIMA modeling procedure, each time series was tested for stationarity in mean and variance. Any systematic trend in a time series was accounted for by differencing the time series; that is, subtracting from each observation the value of a preceding observation at a lag that was indicated by conventional diagnostics. This serves to detrend a time series and make it possible to test whether it was different in level, after versus before the onset of each hypothesized interruption. For each of the four time series that were analyzed, plots of the autocorrelation function and partial autocorrelation function and the Q statistic were used to test whether the ARIMA model that was fit to each time series, before and after the transfer function modeling, produced white noise residuals.<sup>29,30</sup> SCA WorkBench Version 6.2.1 was used for the analysis (Scientific Computing Associates Corp., Villa Park, Illinois).

## Results

In total, 11,505 suicides, 9,079 by men and 2,426 by women, occurred in Greece from January 1, 1983 to December 31, 2012. The maximum number of monthly reported suicides that occurred over the 30-year study period was 64 in July 2012, followed by 62 in May 2012. The minimum number of monthly reported suicides was 14 in both February 1983 and November 1999. Over the months of the prosperity period (September 1997 to August 2004) a linear trend analysis showed a small average monthly decrease of -0.01 total suicides per month. By comparison, over the months of the austerity period (October 2008 to December 2012) a linear trend analysis showed an average monthly increase of 0.31 total suicides per month. (Figure 1)

Over the entire 30-year study period, the average monthly number of suicides was 32.0 (+/- 8.5) overall, 25.2 (+/- 7.2) for males, and 6.7 (+/- 3.3) for females. The average monthly number of suicides was 30.3 (+/- 7.8) within the prosperity period and 36.0 (+/- 10.0) within the austerity period ( $p < 0.001$ ). Among males, the average monthly number of suicides was 24.3 (+/- 6.7) within the prosperity period and 30.4 (+/- 8.9) within the austerity period ( $p < 0.001$ ). Among females, the average monthly number of suicides was 6.0 (+/- 2.6) within the prosperity period and 5.6 (+/- 2.8) within the austerity period.

### Interruptions-in-time that were tested

We identified 12 interruptions that may have impacted suicide over the study period, 3 initial prosperity-related events and 9 subsequent austerity-related events. Prosperity-related events began in 1997 when the International Olympic Committee announced that Greece would host the 2004 Olympic Games, through 2000 when Greece was accepted into the Economic and Monetary Union of the European Union, until 2004 when the Olympic Games occurred. The austerity-related events occurred from 2008-2012 with the start of the Greek recession, through various financial bailout packages, riots, strikes, and protests, until a Greek pensioner committed a highly publicized suicide in the main square of Athens in response to austerity conditions. (Table 1)

### Analyses of interruptions-in-time, overall and by gender

The total number of suicides in Greece underwent a significant, abrupt and sustained increase of 11.2 average suicides per month (34.7%) in June 2011, when the Greek government passed a second series of austerity measures ( $p = 0.0004$ ). No other austerity

1  
2  
3 or prosperity-related events corresponded to significant shifts in total suicides. (Table 2,  
4 Figure 2a)  
5  
6

7 The number of suicides by Greek men underwent significant, abrupt and sustained  
8 increases of 3.4 average suicides per month (13.9%,  $p=0.0009$ ) in October 2008, when the  
9 Greek recession began, and an additional 5.1 average suicides per month (18.3%,  
10  $p=0.0002$ ) in June 2011. The number of suicides by Greek men then underwent an abrupt  
11 but temporary increase of 9.8 suicides per month (29.8%,  $p=0.03$ ) in April 2012, gradually  
12 returning to the pre-event average (Table 2, Figure 2b). Among Greek females, the  
13 incidence of suicide experienced an abrupt and sustained increase of 2.4 average suicides  
14 per month (35.8%,  $p=0.04$ ) in May 2011 (Table 2, Figure 2c).  
15  
16

### 17 Sensitivity analyses

18 A combined total of 18,092 suicides plus potentially misclassified suicides occurred in  
19 Greece over the 30-year study period, corresponding to an average of 50.3 (+/- 10.8)  
20 fatalities per month. Sensitivity analyses of this time series revealed that the number of  
21 recorded fatalities increased significantly, abruptly and in a sustained way in June 2011 by  
22 an average of 10.2 deaths per month (20.5%,  $p=0.0004$ ). No other austerity or prosperity-  
23 related events corresponded to significant shifts in this time series. (Table 2, Figure 2d)  
24  
25  
26

### 27 **Discussion**

28 Select austerity-related economic events in Greece corresponded to statistically significant  
29 changes in suicide. The June 2011 economic interruption was especially remarkable in that  
30 it led to significant, abrupt and sustained increases in both total suicides, by 35%, and male  
31 suicides, by 18%. Sensitivity analyses that figured in under-counting of suicides also found  
32 a significant, abrupt and sustained increase in June 2011, further reinforcing the  
33 importance of this month. An abrupt and sustained increase of borderline significance was  
34 also found for Greek females in May 2011.  
35  
36  
37

38 Relative to other months in which new series of austerity measures were passed by the  
39 Greek government, June 2011 may have been most significant because it was the first part  
40 of a larger austerity plan that passed by a very narrow vote. This passage occurred despite  
41 polls suggesting that the vast majority of Greeks were opposed to the austerity plan. It also  
42 occurred amid multi-day demonstrations, that turned violent as protestors rioted outside  
43 the Greek Parliament, and strikes that halted most public services and closed Greek banks.  
44  
45  
46

47 Differences between the earlier prosperity period and the later austerity period were also  
48 clear. No prosperity-related events (Greece entering the EU, hosting the summer  
49 Olympics) corresponded with significant reductions in suicide. The prosperity period  
50 included the lowest month of suicides in 30 years, whereas the austerity period included  
51 the highest months. The prosperity period experienced significantly fewer suicides on  
52 average per month and showed almost no trend in suicides, whereas the austerity period  
53 showed a relatively steep upward trend in suicides.  
54  
55

56 Greek men also experienced a significant, abrupt and sustained 14% increase in suicide  
57 beginning in October 2008, the same month as the documented start of the recession in  
58  
59  
60

1  
2  
3 Greece. This well publicized start was marked by the first sustained reduction in the Greek  
4 gross domestic product and has pervaded the national public conscience ever since.  
5  
6

7 Increases in male suicide have been documented in other countries following economic  
8 crises. As in these other countries, Greek economic instability primarily affected men who  
9 were the predominant family income generators compared with women.<sup>12,17,31,32</sup> The  
10 sustained and statistically significant nature of the October 2008 and June 2011 increases  
11 in Greek male suicide reveal the systemic and lasting effect that large government austerity  
12 programs can have on national economic stability and public health.  
13  
14

15 Although of borderline statistical significance, Greek men additionally demonstrated a  
16 large, but temporary, 30% increase in suicides in April 2012. This increase in Greek male  
17 suicide followed the highly publicized suicide of a Greek male pensioner in the main square  
18 of Athens in response to austerity conditions. Although short-lived and having a less  
19 statistically significant impact on male suicide than the prior two government-generated  
20 events, this event immediately preceded the two highest months of suicide in our entire 30  
21 year study period.  
22  
23  
24

25 The April 2012 austerity-related event was a personal tragedy, committed by an individual  
26 acting alone, not the Greek government. More importantly, this same individual's suicide  
27 was repeatedly covered across many news outlets as a stand-alone story that included the  
28 victim's name, method of suicide, precipitating life events, and quotes from a suicide note,  
29 all aspects of media reporting on suicide that have been statistically associated with or  
30 hypothesized to create copycat suicide behaviour.<sup>39</sup> Greek commentators have indeed  
31 argued that increased recognition of a possible austerity-suicide relationship created by  
32 media reports may have become a self-fulfilling prophecy<sup>4</sup> at some point after the  
33 economic crisis began. Thus, the news coverage and short-lived impact of this April 2012  
34 austerity-related event point to a media-oriented trigger for the high numbers of male  
35 suicides that occurred in the three months that followed.  
36  
37  
38

39 Finally, Greek women, who accounted for approximately one of every four suicides, also  
40 experienced an abrupt and sustained increase in suicides in May 2011. Although of  
41 borderline significance, this sustained increase in Greek female suicide was larger, on a  
42 percentage basis, than that for males in 2011. This finding runs counter to previous  
43 research showing that economic downturns tend to result in larger increases in male, but  
44 not female, suicides.<sup>12,17</sup>  
45  
46  
47

#### 48 Prior reports and factors related to suicide in Greece

49 Although numerous publications and commentaries have speculated in recent years about  
50 the impact of economic austerity measures on suicides in Greece, appropriate skepticism  
51 has remained as to whether this relationship is real.<sup>6</sup> These speculations, generally based  
52 on government reports, unofficial data, or the media, have placed an increase in Greek  
53 suicides anywhere from 17-40%.<sup>1,3-5</sup> One study completed a valuable regression analysis  
54 of suicide trends in 54 countries, including Greece, although was limited in that it  
55 aggregated suicides by calendar year given the World Health Organization mortality data  
56 that were available.<sup>17</sup> This same study suggested further analyses be conducted as monthly  
57  
58  
59  
60

1  
2  
3 aggregations of suicide, which we have done here for Greece. Monthly interrupted time-  
4 series analyses have also been recently completed in other Southern European countries,  
5 such as Spain where an 8% increase in suicide was shown to follow the start of the  
6 financial crisis there in 2008.<sup>31</sup>  
7  
8

9  
10 This is the first multi-decade, national analysis of Greek suicide using monthly data. In  
11 adjusting for underlying temporal trends, our modeling approach was able to identify the  
12 timing, nature, and magnitude of shifts in suicides that followed the announcements of  
13 acute-onset economic events. Prior analyses have provided a great deal of vital and timely  
14 new information but have been limited by smaller numbers of yearly observations over a  
15 single decade or less, or have been restricted to specific suicide subpopulations in  
16 Greece.<sup>12,17,33,34</sup> Our analysis was thus in direct response to prior commentaries calling for  
17 further processing and analysis of more complete data<sup>4</sup>, systematic, large-scale,  
18 longitudinal investigations of the effect of the economic crisis on suicide in Greece<sup>6-8</sup>, and  
19 the need to investigate whether a link exists between the economic crisis in Greece and  
20 suicide.<sup>7,9</sup>  
21  
22

23  
24 Despite historically having one of the lowest suicide rates in the world<sup>12</sup>, Greece is thought  
25 to have been more affected by the global financial downturn than any other European  
26 country.<sup>3</sup> The cumulative stress and lowered hopes brought on by an unrelenting and  
27 sizeable economic downturn in Greece – including high unemployment rates<sup>3</sup>, severe  
28 material deprivation, and increasing homelessness – may result in sustained increases in  
29 suicide.<sup>1,3,17,35</sup> Although some have argued that suicide rates in Greece do not correspond  
30 with unemployment<sup>7</sup>, the connection between economic instability, unemployment,  
31 financial strain, loss of status, and suicide has been posited as a reasonable explanation in  
32 similarly affected countries.<sup>31</sup> Parallel increases in depression and not seeking medical  
33 care in the Greek population from 2008 to 2011 also potentially corresponded with the  
34 recession-suicide connection.<sup>3,35</sup>  
35  
36

37  
38 Because of the potential influence of these many other factors, the time-series models we  
39 employed were designed to isolate and statistically test the effects of acute, well-publicized  
40 austerity and prosperity interruptions-in-time. Through a detrending procedure, our time-  
41 series models accounted for general, long-term trends in countless temporal factors that  
42 were not directly measured – fluctuations by season, unemployment, psychiatric disorders,  
43 changes to the Greek mental healthcare system, etc.  
44  
45

#### 46 Study limitations

47 Several study limitations deserve comment. Prior studies have pointed to the  
48 misclassification of suicide as a clear source of bias in national analyses.<sup>12,17-19</sup> This is a  
49 particular issue for Greece where religious and other reasons potentially drive under-  
50 reporting of suicide.<sup>12</sup> However, it has also been shown that when comparing suicides to  
51 the patterns of accidental falls and poisonings in Greece, a large-scale misclassification  
52 masking of the true suicide rate is unlikely.<sup>7</sup> The results reported here also appear to be  
53 minimally affected by this misclassification bias; our sensitivity analyses accounting for  
54 suicide under-reporting maintained the same basic findings.  
55  
56  
57  
58  
59  
60

1  
2  
3 A second limitation was the absence of nonfatal self-directed injuries in our analysis.<sup>7</sup> One  
4 study showed a 36% increase in the number of Greeks who reported having attempted  
5 suicide.<sup>36</sup> Although only fatal suicide data were available at a national level in Greece, and  
6 completed suicides were the main topic of prior debate, the analysis of parasuicides or  
7 attempted suicides could have produced different results, especially for certain subgroups,  
8 such as females who are known to have higher nonfatal suicide rates than males.<sup>34</sup> In  
9 general, our analysis of Greek female suicides also proceeded with relatively small  
10 numbers per month and month-to-month changes of even a few female suicides may be  
11 detected as statistically significant. This sensitivity to small fluctuations warrants caution  
12 when interpreting our results for female suicide.  
13  
14  
15

16  
17 Finally, the significant shifts that we identified may have been related to the austerity  
18 measures themselves or could have been related to entirely different, but unmeasured,  
19 events that happened in the same months as our interruptions. Events from other months  
20 within our 30-year period that we did not identify may have also been important, although  
21 in an effort to minimize multiple testing issues we limited the number of interruptions we  
22 tested. Future work could incorporate co-occurring or other monthly economic  
23 interruptions, as well as additional suicide data, from later months and years, to further  
24 test our findings.<sup>17</sup>  
25  
26

### 27 Conclusions

28 Our analysis points to a significant increase in suicides following austerity-related events in  
29 Greece. Given these findings, we concur with others that a more robust mental healthcare  
30 system that offers more screening, follow-up, and treatment of people with suicidal  
31 ideation and accompanying mental health conditions is clearly in order for Greece.<sup>1,6,36</sup>  
32 Less expensive telephone and web-based psychotherapies that build long-term  
33 relationships between clients and providers also appear to hold promise in reducing  
34 suicidal ideation and might be considered.<sup>38</sup> In addition to these potential strategies,  
35 enhanced access to everyday activities, goods, and services that are not available in some  
36 areas, as well as reduced access to the means of suicide among high-risk populations, are  
37 also important strategies to consider.<sup>18,23,33</sup>  
38  
39  
40

41 While potentially useful, these suicide reduction strategies nevertheless do not directly  
42 address the overarching and persistent issue of the austerity-related events themselves. As  
43 future austerity measures are considered, greater weight should be given to the  
44 unintended mental health consequences of these measures. Greater attention should also  
45 be paid to the public reporting of austerity measures and any subsequent suicide-related  
46 events that may follow (including the framing of analyses such as this one), while still  
47 maintaining open journalism and accurate reporting.<sup>39,40</sup> It has been argued that the  
48 policies of austerity implemented in Greece have been largely unscientific.<sup>1</sup> Future  
49 economic policies, and the public messaging of these policies and related events, may  
50 benefit from the findings documented here.  
51  
52  
53  
54  
55  
56  
57  
58  
59  
60

1  
2  
3  
4  
5  
6  
7  
8  
9  
10  
11  
12  
13  
14  
15  
16  
17  
18  
19  
20  
21  
22  
23  
24  
25  
26  
27  
28  
29  
30  
31  
32  
33  
34  
35  
36  
37  
38  
39  
40  
41  
42  
43  
44  
45  
46  
47  
48  
49  
50  
51  
52  
53  
54  
55  
56  
57  
58  
59  
60

| Month          | Event type         | Description of Economic Interruption                                                                                              |
|----------------|--------------------|-----------------------------------------------------------------------------------------------------------------------------------|
| September 1997 | Prosperity-related | International Olympic Committee announces that Greece will host the 2004 Summer Olympic Games                                     |
| June 2000      | Prosperity-related | Greece is accepted into the Economic and Monetary Union of the European Union (EU)                                                |
| August 2004    | Prosperity-related | Olympic Games are held in Athens, Greece                                                                                          |
| October 2008   | Austerity-related  | Start of the recession in Greece as marked by the beginning of a sustained percent reduction in national gross domestic product   |
| December 2008  | Austerity-related  | Concerns over economy come to a head with highly publicized police shooting of a teenage student that triggers protests and riots |
| March 2010     | Austerity-related  | Greek government announces a series of new austerity measures amid strikes, riots, and protests                                   |
| May 2010       | Austerity-related  | Greek government passes a series of new austerity measures alongside widespread stoppages, protests, riots, and violence          |
| May 2011       | Austerity-related  | Large organized public protests of austerity measures in multiple major cities across Greece                                      |
| June 2011      | Austerity-related  | Greek government passes a series of new austerity measures alongside widespread protests, strikes, riots, and violence            |
| October 2011   | Austerity-related  | Greek government passes a series of new austerity measures alongside widespread protests and strikes                              |
| February 2012  | Austerity-related  | Greek government passes a series of new austerity measures amid large protests, riots, and violence                               |
| April 2012     | Austerity-related  | Greek pensioner openly commits highly publicized suicide in the main square of Athens in response to austerity conditions         |

**Table 1.** Greek prosperity-related and austerity-related economic events that were tested as time-series interruptions from 1983-2012.

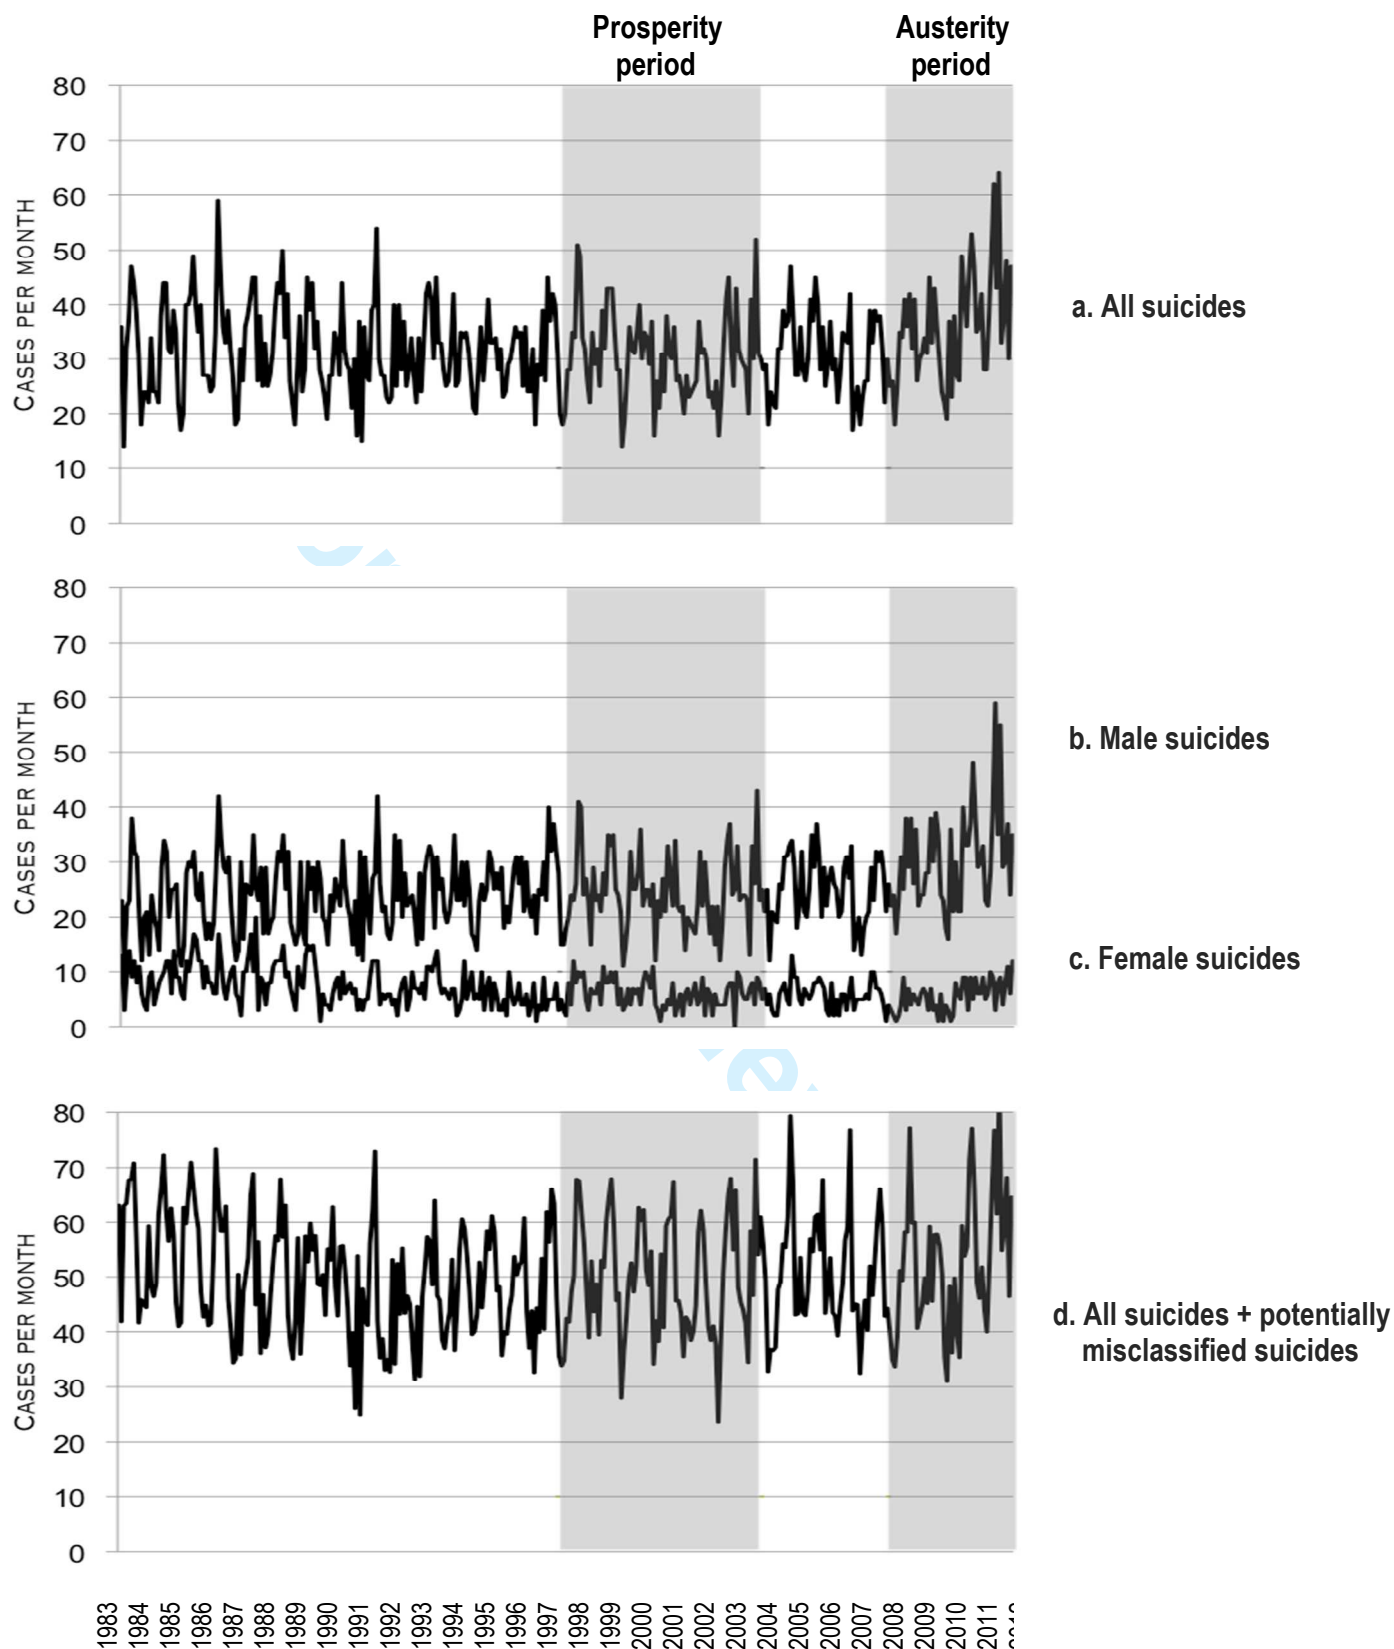

**Figure 1.** Monthly trends in suicide across Greece for all suicides, gender subcategories of suicide, and potentially misclassified suicides (first grey band denotes “prosperity” period and second grey band denotes “austerity” period).

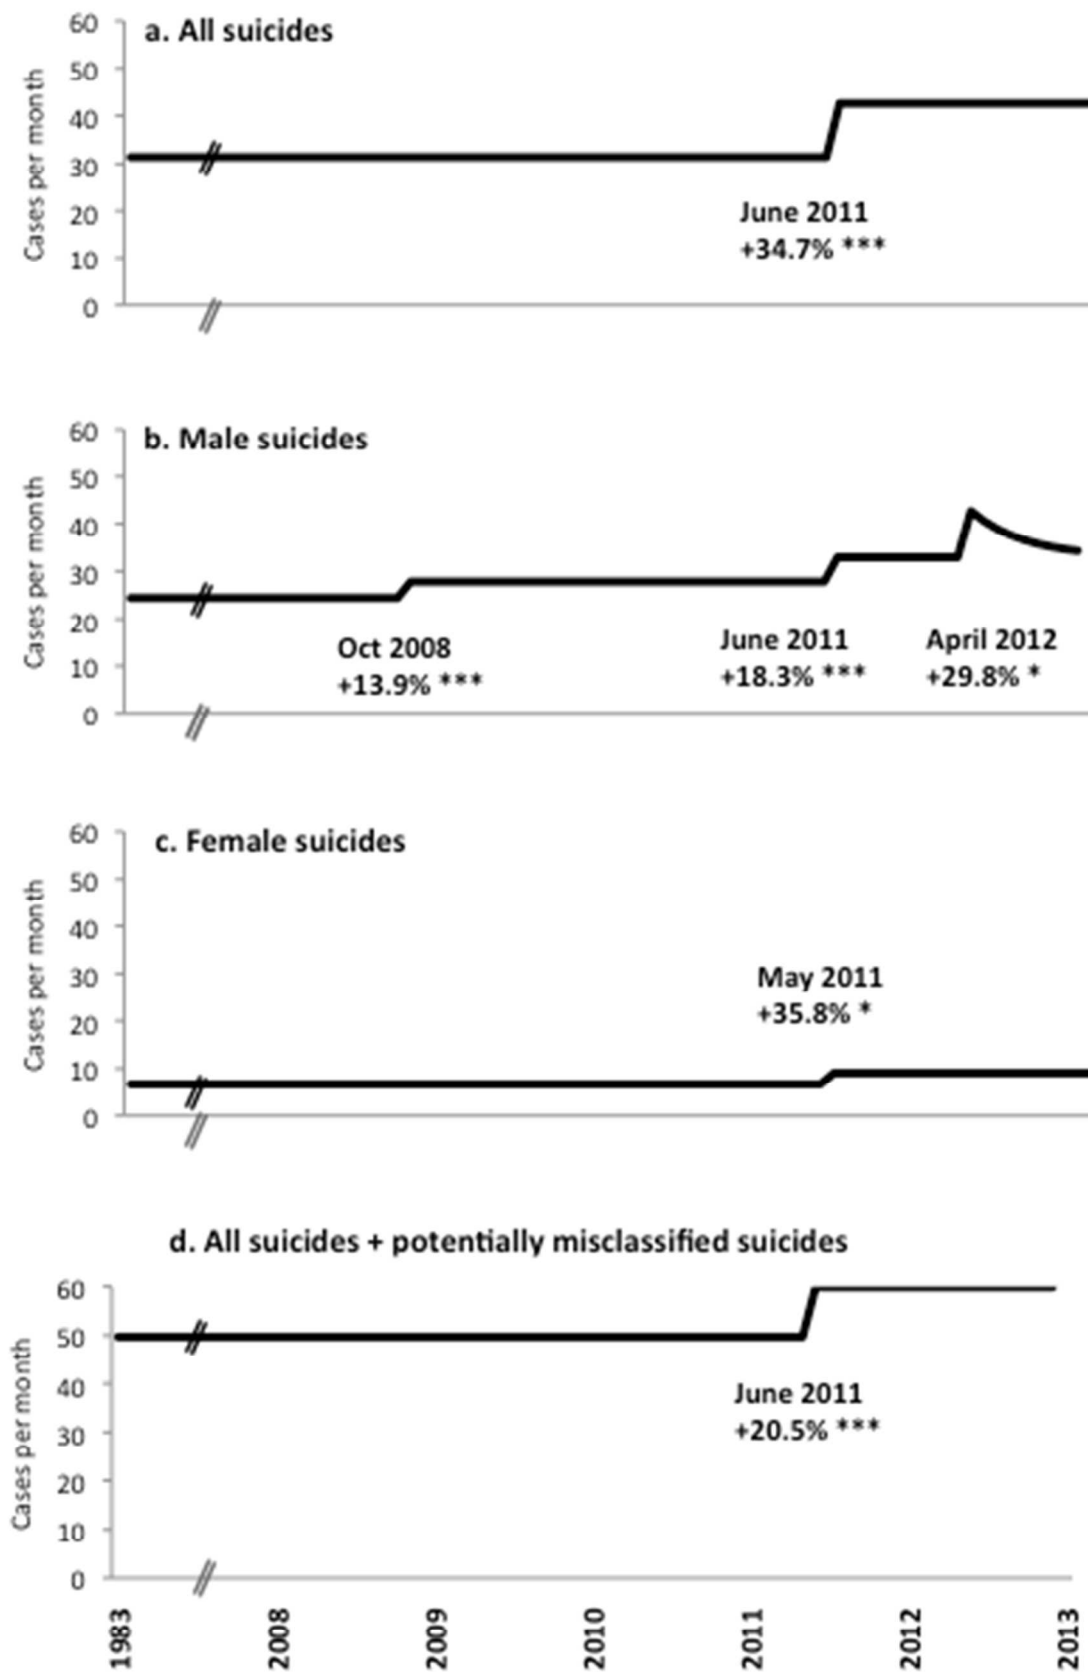

**Figure 2.** Estimated forms (abrupt sustained, abrupt temporary) and sizes (%) of statistically significant monthly interruptions in four Greek suicide time series analyzed using ARIMA models. \*  $p < 0.05$ , \*\*  $p < 0.01$ , \*\*\*  $p < 0.001$



|                | All suicides          |      |                        |       |                       | Male suicides         |         |                        |         |                       | Female suicides       |        |                        |       |                       | All suicides + potentially misclassified suicides |       |                        |        |                       |
|----------------|-----------------------|------|------------------------|-------|-----------------------|-----------------------|---------|------------------------|---------|-----------------------|-----------------------|--------|------------------------|-------|-----------------------|---------------------------------------------------|-------|------------------------|--------|-----------------------|
|                | Abrupt sustained test |      | Gradual sustained test |       | Abrupt temporary test | Abrupt sustained test |         | Gradual sustained test |         | Abrupt temporary test | Abrupt sustained test |        | Gradual sustained test |       | Abrupt temporary test | Abrupt sustained test                             |       | Gradual sustained test |        | Abrupt temporary test |
|                | Size                  | Size | Growth rate            | Size  | Decay rate            | Size                  | Size    | Growth rate            | Size    | Decay rate            | Size                  | Size   | Growth rate            | Size  | Decay rate            | Size                                              | Size  | Growth rate            | Size   | Decay rate            |
| September 1997 | -.42                  | .26  | .42                    | 2.21  | .77                   | -.16                  | -.13    | .44                    | .17     | .99                   | .15                   | .13    | .13                    | .07   | .95                   | .58                                               | .51   | .37                    | .08    | .62                   |
| June 2000      | -1.25                 | .01  | 1.07                   | 2.68  | .78                   | .05                   | .05     | .64                    | .18     | .77                   | .87                   | -1.79  | .94                    | .71   | .45                   | .92                                               | 1.38  | .53                    | .14    | .88                   |
| August 2004    | 1.01                  | .51  | .52                    | -2.67 | .42                   | .71                   | .27     | .67                    | 1.33    | .82                   | .30                   | .23    | .59                    | .24   | .74                   | .13                                               | -.16  | .64                    | .33    | 1.01                  |
| October 2008   | 1.95                  | 3.57 | .78                    | 4.43  | .36                   | 3.44***               | 5.30    | .65                    | 2.01    | .03                   | 1.23                  | -1.63  | .32                    | .43   | .68                   | .14                                               | .07   | .82                    | .04    | 1.12                  |
| December 2008  | 1.86                  | 1.30 | .33                    | .18   | .67                   | .41                   | .10     | .52                    | .23     | 0.54                  | -1.31                 | -1.74  | .35                    | -2.55 | .82                   | .34                                               | -.43  | .68                    | -5.51  | .56                   |
| March 2010     | 12.31                 | .23  | 1.07                   | .28   | .62                   | -.80                  | -.69    | .44                    | 10.70   | .07                   | -1.30                 | -0.79  | .48                    | .11   | .50                   | -3.42                                             | -3.02 | .32                    | 7.78   | .69                   |
| May 2010       | .04                   | .10  | .59                    | 1.50  | .75                   | -2.08                 | -1.51   | .35                    | .15     | .69                   | -.82                  | -.23   | .78                    | .61   | .53                   | -4.62                                             | -1.87 | .61                    | .63    | 7.28                  |
| May 2011       | .48                   | .44  | .60                    | .39   | .95                   | -6.02                 | -6.26   | .24                    | .01     | .83                   | 2.37*                 | 4.31*† | .80*†                  | 3.43  | .66                   | -3.81                                             | -4.27 | .40                    | .07    | .94                   |
| June 2011      | 11.20***              | 5.87 | .50                    | -7.68 | .20                   | 5.13***               | 10.42*† | .79*†                  | 11.86*† | .89*†                 | -3.19                 | -5.99  | .67                    | -5.7  | .22                   | 10.20***                                          | 6.54  | .37                    | -6.30  | .14                   |
| September 2011 | 1.24                  | 1.30 | .21                    | 7.33  | .59                   | -5.35                 | -3.06   | .75                    | 8.83    | .12                   | 1.31                  | 1.83   | .55                    | .40   | .89                   | 1.46                                              | 1.65  | .45                    | 8.98   | .47                   |
| February 2012  | 1.69                  | 1.39 | .52                    | -9.68 | .46                   | 8.65                  | -3.06   | .75                    | -9.03   | .12                   | .98                   | .56    | .49                    | .14   | 1.42                  | 2.33                                              | .12   | 1.27                   | -10.34 | .61                   |
| April 2012     | 4.64                  | 2.39 | .42                    | .16   | 1.70*                 | -9.03                 | -9.18   | .04                    | 9.81*   | .78**                 | .44                   | .37    | .43                    | .10   | -1.71                 | 6.55                                              | 6.67  | .01                    | -.22   | .65                   |

All suicide model: ARIMA(0,0,0)(0,1,1).<sup>12</sup> Male suicide model: ARIMA(0,0,0)(0,1,1).<sup>12</sup> Female suicide model: ARIMA(1,0,1)(0,1,1).<sup>12</sup>

All suicide + potentially misclassified suicides model: ARIMA(1,0,1)(0,1,1).<sup>14</sup>

Size: numerator coefficient. Growth rate and decay rate: denominator coefficient. Abrupt sustained test: zero order transfer function applied to step.

Gradual permanent test: first order transfer function applied to step. Abrupt temporary test: first order transfer function applied to pulse.

\*p<0.05 \*\*p<0.01 \*\*\*p<0.001, Boxes indicate interruptions that were statistically significant and retained in final model.

† The coefficient was statistically significant but produced a poorly fitting estimate of the time series and thus was rejected.

**Table 2.** Time-series ARIMA modeling results of the impact of austerity-related and prosperity-related events on four monthly Greek suicide time series studied from 1983-2012.

## References

1. Kondilis E, Giannakopoulos S, Gavana M, Ierodiakonou I, Waitzkin H, Benos A. Economic crisis, restrictive policies, and the population's health and health care: the Greek case. *Am J Public Health*. 2013;103(6):973-980.
2. Stuckler D, Meissner C, Fishback P, Basu S, McKee M. Banking crises and mortality during the Great Depression: evidence from US urban populations, 1929-1937. *J Epidemiol Commun H*. 2011:1-10.
3. Kentikelenis A, Karanikolos M, Papanicolas I, Basu S, McKee M, Stuckler D. Health effects of financial crisis: omens of a Greek tragedy. *Lancet*. 2011;378:1457-1458.
4. Fountoulakis KN, Koupidis SA, Grammatikopoulos IA, Theodorakis PN. First reliable data suggest a possible increase in suicides in Greece. *BMJ*. 2013;347:1-2.
5. Stuckler D, Basu S, Suhrcke M, Coutts A, McKee M. Effects of the 2008 recession on health: a first look at European data. *Lancet*. 2011;378:124-125.
6. Hyphantis T. The "depression" of mental health care in general hospitals in Greece in the era of recession. *J Psychosomatic Research*. 2013;74:530-532.
7. Fountoulakis KN, Grammatikopoulos IA, Koupidis SA, Siamouli M, Theodorakis PN. Health and the financial crisis in Greece. *Lancet*. 2012;379:1001-1002.
8. Economou M, Madianos M, Theleritis C, Peppou LE, Stefanis CN. Increased suicidality amid economic crisis in Greece. *Lancet*. 2011;378:1459.
9. Horton R. Offline: Looking forward to some surprises. *Lancet*. 2011;377:2164.
10. Anonymous. Regulation of the Statistical Obligations of the Agencies of the Hellenic Statistical System (ELSS). Piraeus: Hellenic Republic. Hellenic Statistical Authority.; 2011:1-8.
11. Anonymous. European Statistics Code of Practice for the National and Community Statistical Authorities: European Statistical System Committee; 2011:1-7.
12. Zacharakis CA, Madianos MG, Papadimitriou GN, C.N. S. Suicide in Greece 1980-1995: patterns and social factors. *Soc Psychiatry Psychiatr Epidemiology*. 1998;33:471-476.
13. Värnik P, Sisask M, Värnik A, et al. Suicide registration in eight European countries: A qualitative analysis of procedures and practices. *Forensic Science International*. 2010;202:86-92.
14. Claassen C, Yip P, Corcoran P, Bossarte R, Lawrence B, Currier G. National suicide rates a century after Durkheim: do we know enough to estimate error? *Suicide and Life-Threatening Behavior*. 2010;40:193-223.
15. Warshauer M, Monk M. Problems in suicide statistics for whites and blacks. *American Journal of Public Health*. 1978;68:383-388.
16. Rockett I, Smith G. Suicide misclassification in an international context. . Paper presented at: Proceedings of the International Collaborative Effort on Injury Statistics 1995; Hyattsville, Maryland, USA.
17. Chang S, Stuckler D, Yip P, Gunnell D. Impact of 2008 global economic crisis on suicide: time trend study in 54 countries. *BMJ*. 2013;17:347-362.
18. Branäs CC, Nance ML, Elliott MR, Richmond TS, Schwab CW. Urban-rural shifts in intentional firearm death: different causes, same results. *Am J Public Health*. Oct 2004;94(10):1750-1755.
19. Rockett I, McKinley T. Reliability and sensitivity of suicide certification in higher-income countries. *Suicide Life-Threatening Behavior*. 1999;29:141-149.
20. Stylianidou S. Terminal cancer patients and euthanasia — The church's position. *Hellenic Journal of Surgery*. 2013;85(2):105-108.
21. Kentikelenis A, Karanikolos M, Papanicolas I, Basu S, McKee M, Stuckler D. Health and the financial crisis in Greece — Authors' reply. *Lancet*. 2012;379:1002.

- 1  
2  
3  
4  
5  
6  
7  
8  
9  
10  
11  
12  
13  
14  
15  
16  
17  
18  
19  
20  
21  
22  
23  
24  
25  
26  
27  
28  
29  
30  
31  
32  
33  
34  
35  
36  
37  
38  
39  
40  
41  
42  
43  
44  
45  
46  
47  
48  
49  
50  
51  
52  
53  
54  
55  
56  
57  
58  
59  
60
22. Kastanaki AE, Kranioti EF, Theodorakis PN, Papadomanolakis A, Michalodimitrakis M. Accuracy of official suicide mortality statistics in Greece: findings from the Island of Crete. *9th Annual Meeting of the Balkan Academy of Forensic Sciences (BAFS)*. Istanbul, Turkey 2013:31.
  23. Ifanti AA, Argyriou AA, Kalofonou FH, Kalofonos HP. Financial crisis and austerity measures in Greece: their impact on health promotion policies and public health care. *Health Policy*. 2013;13:154-168.
  24. Anonymous. Quarterly national accounts: 2nd Quarter 2013 (Provisional). [http://www.statistics.gr/portal/page/portal/ESYE/BUCKET/A0704/PressReleases/A0704\\_SEL84\\_DT\\_QQ\\_02\\_2013\\_01\\_P\\_EN.pdf](http://www.statistics.gr/portal/page/portal/ESYE/BUCKET/A0704/PressReleases/A0704_SEL84_DT_QQ_02_2013_01_P_EN.pdf); Hellenic Statistical Authority; 2013.
  25. Wearden G. Greece debt crisis: timeline. *The Guardian*. May 5, 2010.
  26. Anonymous. Timeline: Greece's economic crisis. *Reuters*. Feb 3 and Mar 11, 2010.
  27. Klimes M. Timeline: Greek austerity strikes and protests. *International Business Times*. Nov 6, 2013.
  28. Anonymous. More riots in Greece over fatal police shooting of teen. *USA Today*. Dec 7, 2008.
  29. McCleary R, Hay R. *Applied time series analysis for the social sciences*. Beverly Hills: Sage Publishing; 1980.
  30. McDowall D, McCleary R. *Interrupted Time Series Analysis*. Vol 21. London: Sage Publishing; 1980.
  31. Lopez Bernal JA, Gasparrini A, Artundo CM, McKee M. The effect of the late 2000s financial crisis on suicides in Spain: an interrupted time-series analysis. *European J Public Health*. 2013;23(5):732-736.
  32. Kondilis E, Ierodiakonou I, Gavana M. Suicide mortality and economic crisis in Greece: men's Achilles heel. *J Epidemiology Community Health*. 2013;67:e1.
  33. Kastanaki AE, Kranioti EF, Papavdi A, Theodorakis PN, Michalodimitrakis M. Suicide by firearms on the island of Crete. *Crisis*. 2010;31(1):43-52.
  34. Kastanaki AE, Kranioti EF, Theodorakis PN, Michalodimitrakis M. Patterns of suicide in Cretan women. In: Vieira DN BA, Cusack D, Beth P, editors, ed. *Acta Medicinae Legalis et Socialis*: Coimbra University Press; 2010:157-164.
  35. Faresjo A, Theodorsson E, Chatziarzenis M, et al. Higher Perceived Stress but Lower Cortisol Levels Found among Young Greek Adults Living in a Stressful Social Environment in Comparison with Swedish Young Adults. *Plos One*. 2013;8(9):1-8.
  36. Madianos M, Economou M, Alexiou T, Stefanis C. Depression and economic hardship across Greece in 2008 and 2009: two cross-sectional surveys nationwide. *Soc Psychiatry Psychiatr Epidemiology*. 2011;46:943-952.
  37. Michas G. Suicides in Greece: a light at the end of the tunnel. *BMJ*. 2013;347:f6249.
  38. Christensen H, Farrer L, Batterham PJ, Mackinnon A, Griffiths KM, Donker T. The effect of a web-based depression intervention on suicide ideation: secondary outcome from a randomised controlled trial in a helpline. *BMJ Open*. 2013;3(6):1-9.
  39. Niederkrotenthaler T, Voracek M, Herberth A, Till B, Strauss M, Etzersdorfer E, Eisenwort B, Sonneck G. Role of media reports in completed and prevented suicide: Werther v. Papageno effects. *British Journal of Psychiatry*. 2010;197:234-243
  40. Pirkis J, Francis C, Blood RW, Burgess B, Morley B, Stewart A, Putnis P. Reporting of suicide in the Australian media. *Aust N Z J Psychiatry* 2002; 36:190-7.

1  
2  
3 **Appendix. ARIMA models**  
4

5  
6 A) All suicides ARIMA model  $(0,0,1)(0,1,1)_{12}$   
7

8  
9 
$$(1 - B^{12})y_t = \vartheta + (1 - \theta_{12}B^{12})a_t$$
  
10

11  
12 B) Male suicides ARIMA model  $(0,0,0)(0,1,1)_{12}$   
13

14  
15 
$$(1 - B^{12})y_t = \vartheta + (1 - \theta_{12}B^{12})a_t$$
  
16  
17

18  
19 C) Female suicides ARIMA model  $(1,0,1)(0,1,1)_{12}$   
20

21  
22 
$$(1 - B^{12})y_t = \vartheta + \frac{(1 - \theta_1 B)(1 - \theta_{12} B^{12})}{(1 - \phi_1 B)} a_t$$
  
23  
24  
25

26  
27 D) All suicides + potentially misclassified suicides  
28 ARIMA model  $(1,0,1)(0,1,1)_{12}$   
29

30  
31 
$$(1 - B^{12})y_t = \vartheta + \frac{(1 - \theta_1 B)(1 - \theta_{12} B^{12})}{(1 - \phi_1 B)} a_t$$
  
32  
33  
34

35 **FINAL MODELS**  
36

37  
38 
$$U_t = W_t + f(I_t)$$
  
39

40  
41 where

42 
$$W_t = Y_t - Y_{t-12}$$
  
43

44 and  $f(I_t)$  is the intervention component of the model  
45  
46

47 **Intervention components**  
48

49  
50 a) Abrupt sustained

51 
$$f(I_t) = \omega_0 I_t$$
  
52  
53

54 where  $I_t$  is a step function such that

55  $I_t = 0$  prior to the event

56  $= 1$  thereafter  
57  
58  
59  
60

1  
2  
3  
4 b) Gradual sustained

5  
6  
7  
8  
9  
10  
11  
12  
13  
14  
15  
16  
17  
18  
19  
20  
21  
22  
23  
24  
25  
26  
27  
28  
29  
30  
31  
32  
33  
34  
35  
36  
37  
38  
39  
40  
41  
42  
43  
44  
45  
46  
47  
48  
49  
50  
51  
52  
53  
54  
55  
56  
57  
58  
59  
60

$$f(I_t) = \frac{\omega_0}{1 - \delta_1 B} I_t$$

where  $I_t$  is a step function such that

$$I_t = 0 \text{ prior to the event} \\ = 1 \text{ thereafter}$$

c) Abrupt temporary

$$f(I_t) = \frac{\omega_0}{1 - \delta_1 B} (1 - B) I_t$$

where  $I_t$  is a pulse function such that

$$I_t = 0 \text{ prior to the intervention} \\ = 1 \text{ at the moment of the intervention} \\ = 0 \text{ thereafter}$$

ARIMA Models Including Intervention Component

A) All suicides

$$U_t = \vartheta + (1 - \theta_{12} B^{12}) a_t + \omega_0 I_{342}$$

B) Male suicides

$$U_t = \vartheta + (1 - \theta_{12} B^{12}) a_t + \omega_0 I_{310} + \omega_0 I_{342} + \frac{\omega_0}{1 - \delta_1 B} (1 - B) I_{352}$$

C) Female suicides

$$U_t = \vartheta + \frac{(1 - \theta_1 B)(1 - \theta_{12} B^{12})}{(1 - \phi_1 B)} a_t + \omega_0 I_{341}$$

D) All suicides + potentially misclassified suicides

$$U_t = \vartheta + \frac{(1 - \theta_1 B)(1 - \theta_{12} B^{12})}{(1 - \phi_1 B)} a_t + \omega_0 I_{353}$$

## References

1. Kondilis E, Giannakopoulos S, Gavana M, Ierodiakonou I, Waitzkin H, Benos A. Economic crisis, restrictive policies, and the population's health and health care: the Greek case. *Am J Public Health*. 2013;103(6):973-980.
2. Stuckler D, Meissner C, Fishback P, Basu S, McKee M. Banking crises and mortality during the Great Depression: evidence from US urban populations, 1929-1937. *J Epidemiol Commun H*. 2011:1-10.
3. Kentikelenis A, Karanikolos M, Papanicolas I, Basu S, McKee M, Stuckler D. Health effects of financial crisis: omens of a Greek tragedy. *Lancet*. 2011;378:1457-1458.
4. Fountoulakis KN, Koupidis SA, Grammatikopoulos IA, Theodorakis PN. First reliable data suggest a possible increase in suicides in Greece. *BMJ*. 2013;347:1-2.
5. Stuckler D, Basu S, Suhrcke M, Coutts A, McKee M. Effects of the 2008 recession on health: a first look at European data. *Lancet*. 2011;378:124-125.
6. Hyphantis T. The "depression" of mental health care in general hospitals in Greece in the era of recession. *J Psychosomatic Research*. 2013;74:530-532.
7. Fountoulakis KN, Grammatikopoulos IA, Koupidis SA, Siamouli M, Theodorakis PN. Health and the financial crisis in Greece. *Lancet*. 2012;379:1001-1002.
8. Economou M, Madianos M, Theleritis C, Peppou LE, Stefanis CN. Increased suicidality amid economic crisis in Greece. *Lancet*. 2011;378:1459.
9. Horton R. Offline: Looking forward to some surprises. *Lancet*. 2011;377:2164.
10. Anonymous. Regulation of the Statistical Obligations of the Agencies of the Hellenic Statistical System (ELSS). Piraeus: Hellenic Republic. Hellenic Statistical Authority.; 2011:1-8.
11. Anonymous. European Statistics Code of Practice for the National and Community Statistical Authorities: European Statistical System Committee; 2011:1-7.
12. Zacharakis CA, Madianos MG, Papadimitriou GN, C.N. S. Suicide in Greece 1980-1995: patterns and social factors. *Soc Psychiatry Psychiatr Epidemiology*. 1998;33:471-476.
13. Värnik P, Sisask M, Värnik A, et al. Suicide registration in eight European countries: A qualitative analysis of procedures and practices. *Forensic Science International*. 2010;202:86-92.
14. Claassen C, Yip P, Corcoran P, Bossarte R, Lawrence B, Currier G. National suicide rates a century after Durkheim: do we know enough to estimate error? *Suicide and Life-Threatening Behavior*. 2010;40:193-223.
15. Warshauer M, Monk M. Problems in suicide statistics for whites and blacks. *American Journal of Public Health*. 1978;68:383-388.
16. Rockett I, Smith G. Suicide misclassification in an international context. . Paper presented at: Proceedings of the International Collaborative Effort on Injury Statistics 1995; Hyattsville, Maryland, USA.
17. Chang S, Stuckler D, Yip P, Gunnell D. Impact of 2008 global economic crisis on suicide: time trend study in 54 countries. *BMJ*. 2013;17:347-362.
18. Branas CC, Nance ML, Elliott MR, Richmond TS, Schwab CW. Urban-rural shifts in intentional firearm death: different causes, same results. *Am J Public Health*. Oct 2004;94(10):1750-1755.
19. Rockett I, McKinley T. Reliability and sensitivity of suicide certification in higher-income countries. *Suicide Life-Threatening Behavior*. 1999;29:141-149.
20. Stylianidou S. Terminal cancer patients and euthanasia — The church's position. *Hellenic Journal of Surgery*. 2013;85(2):105-108.
21. Kentikelenis A, Karanikolos M, Papanicolas I, Basu S, McKee M, Stuckler D. Health and the financial crisis in Greece — Authors' reply. *Lancet*. 2012;379:1002.

- 1
- 2
- 3
- 4 22. Kastanaki AE, Kranioti EF, Theodorakis PN, Papadomanolakis A, Michalodimitrakis M. Accuracy of
- 5 official suicide mortality statistics in Greece: findings from the Island of Crete. *9th Annual Meeting*
- 6 *of the Balkan Academy of Forensic Sciences (BAFS)*. Istanbul, Turkey 2013:31.
- 7 23. Ifanti AA, Argyriou AA, Kalofonou FH, Kalofonos HP. Financial crisis and austerity measures in
- 8 Greece: their impact on health promotion policies and public health care. *Health Policy*.
- 9 2013;13:154-168.
- 10 24. Anonymous. Quarterly national accounts: 2nd Quarter 2013 (Provisional).
- 11 [http://www.statistics.gr/portal/page/portal/ESYE/BUCKET/A0704/PressReleases/A0704\\_SEL8](http://www.statistics.gr/portal/page/portal/ESYE/BUCKET/A0704/PressReleases/A0704_SEL8)
- 12 [4\\_DT\\_QQ\\_02\\_2013\\_01\\_P\\_EN.pdf](http://www.statistics.gr/portal/page/portal/ESYE/BUCKET/A0704/PressReleases/A0704_SEL8); Hellenic Statistical Authority; 2013.
- 13 25. Wearden G. Greece debt crisis: timeline. *The Guardian*. May 5, 2010.
- 14 26. Anonymous. Timeline: Greece's economic crisis. *Reuters*. Feb 3 and Mar 11, 2010.
- 15 27. Klimes M. Timeline: Greek austerity strikes and protests. *International Business Times*. Nov 6,
- 16 2013.
- 17 28. Anonymous. More riots in Greece over fatal police shooting of teen. *USA Today*. Dec 7, 2008.
- 18 29. McCleary R, Hay R. *Applied time series analysis for the social sciences*. Beverly Hills: Sage
- 19 Publishing; 1980.
- 20 30. McDowall D, McCleary R. *Interrupted Time Series Analysis*. Vol 21. London: Sage Publishing; 1980.
- 21 31. Lopez Bernal JA, Gasparrini A, Artundo CM, McKee M. The effect of the late 2000s financial crisis
- 22 on suicides in Spain: an interrupted time-series analysis. *European J Public Health*.
- 23 2013;23(5):732-736.
- 24 32. Kondilis E, Ierodiakonou I, Gavana M. Suicide mortality and economic crisis in Greece: men's
- 25 Achilles heel. *J Epidemiology Community Health*. 2013;67:e1.
- 26 33. Kastanaki AE, Kranioti EF, Papavdi A, Theodorakis PN, Michalodimitrakis M. Suicide by firearms
- 27 on the island of Crete. *Crisis*. 2010;31(1):43-52.
- 28 34. Kastanaki AE, Kranioti EF, Theodorakis PN, Michalodimitrakis M. Patterns of suicide in Cretan
- 29 women. In: Vieira DN BA, Cusack D, Beth P, editors, ed. *Acta Medicinae Legalis et Socialis*: Coimbra
- 30 University Press; 2010:157-164.
- 31 35. Faresjo A, Theodorsson E, Chatziarzenis M, et al. Higher Perceived Stress but Lower Cortisol
- 32 Levels Found among Young Greek Adults Living in a Stressful Social Environment in Comparison
- 33 with Swedish Young Adults. *Plos One*. 2013;8(9):1-8.
- 34 36. Madianos M, Economou M, Alexiou T, Stefanis C. Depression and economic hardship across Greece
- 35 in 2008 and 2009: two cross-sectional surveys nationwide. *Soc Psychiatry Psychiatr Epidemiology*.
- 36 2011;46:943-952.
- 37 37. Michas G. Suicides in Greece: a light at the end of the tunnel. *BMJ*. 2013;347:f6249.
- 38 38. Christensen H, Farrer L, Batterham PJ, Mackinnon A, Griffiths KM, Donker T. The effect of a web-
- 39 based depression intervention on suicide ideation: secondary outcome from a randomised
- 40 controlled trial in a helpline. *BMJ Open*. 2013;3(6):1-9.
- 41 39. Niederkrotenthaler T, Voracek M, Herberth A, Till B, Strauss M, Etzersdorfer E, Eisenwort B,
- 42 Sonneck G. Role of media reports in completed and prevented suicide: Werther v. Papageno
- 43 effects. *British Journal of Psychiatry*. 2010;197:234-243
- 44 40. Pirkis J, Francis C, Blood RW, Burgess B, Morley B, Stewart A, Putnis P. Reporting of suicide in the
- 45 Australian media. *Aust N Z J Psychiatry* 2002; 36:190-7.
- 46
- 47
- 48
- 49
- 50
- 51
- 52
- 53
- 54
- 55
- 56
- 57
- 58
- 59
- 60

# BMJ Open

## The impact of economic austerity and prosperity events on suicide in Greece: a 30-year interrupted time-series analysis

|                                 |                                                                                                                                                                                                                                                                                                                                                                                                                                                                                                                                                                                     |
|---------------------------------|-------------------------------------------------------------------------------------------------------------------------------------------------------------------------------------------------------------------------------------------------------------------------------------------------------------------------------------------------------------------------------------------------------------------------------------------------------------------------------------------------------------------------------------------------------------------------------------|
| Journal:                        | <i>BMJ Open</i>                                                                                                                                                                                                                                                                                                                                                                                                                                                                                                                                                                     |
| Manuscript ID:                  | bmjopen-2014-005619.R1                                                                                                                                                                                                                                                                                                                                                                                                                                                                                                                                                              |
| Article Type:                   | Research                                                                                                                                                                                                                                                                                                                                                                                                                                                                                                                                                                            |
| Date Submitted by the Author:   | 16-Sep-2014                                                                                                                                                                                                                                                                                                                                                                                                                                                                                                                                                                         |
| Complete List of Authors:       | Branas, Charles; University of Pennsylvania, Kastanaki, Anastasia; University of Crete, Faculty of Medicine<br>Michalodimitrakis, Manolis; University of Crete, Forensic Pathology<br>Tzougas, John; Hellenic Statistical Authority, Director General<br>Kranioti, Elena; University of Edinburgh, Forensic Anthropology<br>Theodorakis, Pavlos; Attica Mental Health Hospitals Trust, WHO National<br>Counterpart for Mental Health<br>Carr, Brendan; University of Pennsylvania, Emergency Medicine<br>Wiebe, Douglas; University of Pennsylvania, Biostatistics and Epidemiology |
| <b>Primary Subject Heading</b>: | Health policy                                                                                                                                                                                                                                                                                                                                                                                                                                                                                                                                                                       |
| Secondary Subject Heading:      | Global health, Epidemiology, Public health                                                                                                                                                                                                                                                                                                                                                                                                                                                                                                                                          |
| Keywords:                       | PUBLIC HEALTH, FORENSIC MEDICINE, Health & safety < HEALTH SERVICES ADMINISTRATION & MANAGEMENT, Health policy < HEALTH SERVICES ADMINISTRATION & MANAGEMENT, MENTAL HEALTH, JOURNALISM (see Medical Journalism)                                                                                                                                                                                                                                                                                                                                                                    |
|                                 |                                                                                                                                                                                                                                                                                                                                                                                                                                                                                                                                                                                     |

SCHOLARONE™  
Manuscripts

only



1  
2  
3 **The impact of economic austerity and prosperity events on suicide in Greece: a 30-**  
4 **year interrupted time-series analysis**  
5  
6

7 Charles C. Branas, PhD  
8 Professor of Epidemiology, University of Pennsylvania  
9 Philadelphia, USA  
10 cbranas@upenn.edu  
11

12  
13 Anastasia E. Kastanaki, PhD  
14 Clinical Psychologist, Faculty of Medicine, University of Crete  
15 Iraklion, Greece  
16 ankastanaki@yahoo.gr  
17

18  
19 Manolis Michalodimitrakis, MD, JD  
20 Professor of Forensic Pathology, University of Crete  
21 Iraklion, Greece  
22 michalom2@gmail.com  
23

24  
25 John Tzougas, PhD  
26 Director General of the Hellenic Statistical Authority, Hellenic Statistical Authority  
27 Piraeus, Greece  
28 jotzo@otenet.gr  
29

30  
31 Elena F. Kranioti, MD, PhD  
32 Lecturer, Forensic Anthropology, University of Edinburgh  
33 Edinburgh, United Kingdom  
34 elena.kranioti@ed.ac.uk  
35

36  
37 Pavlos N. Theodorakis, MD, PhD  
38 CEO and Chairman of Attica Mental Health Hospitals Trust, WHO National Counterpart for  
39 Mental Health  
40 Athens, Greece  
41 theodorakispavlos@gmail.com  
42  
43

44  
45 Brendan G. Carr, MD, MA, MS  
46 Assistant Professor of Emergency Medicine, University of Pennsylvania  
47 Philadelphia, USA  
48 carrb@mail.med.upenn.edu  
49

50  
51 Douglas J. Wiebe, PhD  
52 Associate Professor of Epidemiology, University of Pennsylvania  
53 Philadelphia, USA  
54 dwiebe@mail.med.upenn.edu  
55  
56  
57  
58  
59  
60

1  
2  
3 Corresponding author contact information:

4 Charles C. Branas, PhD  
5 Professor of Epidemiology  
6 University of Pennsylvania  
7 Department of Biostatistics and Epidemiology  
8 Blockley Hall, 423 Guardian Drive  
9 Philadelphia, PA 19104-6021 USA  
10 Email: cbranas@upenn.edu  
11

12  
13 Key words: economic policy, mental health, suicide, injury, time-series  
14  
15  
16  
17  
18  
19  
20  
21  
22  
23  
24  
25  
26  
27  
28  
29  
30  
31  
32  
33  
34  
35  
36  
37  
38  
39  
40  
41  
42  
43  
44  
45  
46  
47  
48  
49  
50  
51  
52  
53  
54  
55  
56  
57  
58  
59  
60

## The impact of economic austerity and prosperity events on suicide in Greece: a 30-year interrupted time-series analysis

### Abstract

#### Objectives:

To complete a 30-year interrupted time-series analysis of the impact of austerity-related and prosperity-related events on the occurrence of suicide across Greece.

#### Setting:

Greece from January 1, 1983 to December 31, 2012.

#### Participants:

A total of 11,505 suicides, 9,079 by men and 2,426 by women, occurring in Greece over the study period.

#### Primary and secondary outcomes:

National data from the Hellenic Statistical Authority assembled as 360 monthly counts of: all suicides, male suicides, female suicides, and all suicides plus potentially misclassified suicides.

#### Results:

In 30 years, the highest months of suicide in Greece occurred in 2012. The passage of new austerity measures in June 2011 marked the beginning of significant, abrupt and sustained increases in total suicides (+37.7%,  $p < 0.001$ ) and male suicides (+18.5%,  $p < 0.01$ ). Sensitivity analyses that figured in under-counting of suicides also found a significant, abrupt and sustained increase in June 2011 (+20.5%,  $p < 0.001$ ). Suicides by men in Greece also underwent a significant, abrupt and sustained increase in October 2008 when the Greek recession began (+13.1%,  $p < 0.01$ ), and an abrupt but temporary increase in April 2012 following a public suicide committed in response to austerity conditions (+29.7%,  $p < 0.05$ ). Suicides by women in Greece also underwent an abrupt and sustained increase in May 2011 following austerity-related events (+35.8%,  $p < 0.05$ ). One prosperity-related event, the January 2002 launch of the Euro in Greece, marked an abrupt but temporary decrease in male suicides (-27.1%,  $p < 0.05$ ).

#### Conclusions:

This is the first multi-decade, national analysis of suicide in Greece using monthly data. Select austerity-related events in Greece corresponded to statistically significant increases for suicides overall, as well as for suicides among men and women. The consideration of future austerity measures should give greater weight to the unintended mental health consequences that may follow and the public messaging of these policies and related events.

## Strengths and limitations of this study

### Strengths include:

- The first multi-decade, national analysis of suicide in Greece using monthly data
- The first analysis of suicide in Greece incorporating the latest official data from 2012
- The first robust statistical interrupted time-series study of specific prosperity and austerity-related events on suicide in Greece (and not simply yearly analyses of general trends)
- The first robust statistical time-series tests of the abrupt effects of *both* prosperity and austerity-related events on suicide
- The first statistical tests and findings concerning the effect of austerity-related media and press coverage on suicides in Greece
- The first time-series study of suicide to include a sensitivity analyses that figures in under-counting and misclassification of suicides

### Limitations include:

- The absence of nonfatal self-directed injuries in our analysis
- Our analysis of female suicides in Greece proceeded with relatively small numbers per month
- The significant shifts that we identified may have been related to the austerity measures themselves or could have been related to different, but unmeasured, events that happened in the same months as our interruptions

## Introduction

The ongoing economic crisis in developed nations is the worst since the Great Depression<sup>1,2</sup> and Greece is thought to have been more affected than any other European country.<sup>3</sup> Numerous academic articles and commentaries have been published in recent years speculating about the impact of recent economic austerity measures in Greece.<sup>1,3-5</sup> These austerity measures followed numerous economic inconsistencies in the national finances of the Greek state that have been viewed as a foundational economic crisis affecting the European economy and, by extension, the world economy.

The weight of this crisis situation and the Greek austerity measures have been highly publicized around the world. Not surprisingly, this publicity and the toxic economic conditions accompanying the austerity measures have also become the leading source of public consternation in Greece itself, exacting considerable stress and strain on the Greek public.<sup>1,4</sup> Everyday citizens in Greece have faced an increasingly bleak crisis and their local media outlets discuss little else. National debt reduction strategies and new austerity measures are publicly, and often abruptly, announced and then followed by large demonstrations, labor strikes, riots, and police actions.

The strain on the Greek public that has persisted for several years now has prompted academic discussion of the potential health effects of the austerity measures. In this regard, fluctuations of suicides in Greece have been a lead topic of discussion, with numerous commentators concluding that the recent austerity measures have indeed led to increased suicides in Greece. This conclusion has, however, been appropriately met with skepticism<sup>6,7,8</sup> and no large-scale, systematic longitudinal analysis has yet been completed to inform the ongoing debate as to whether austerity measures have led to statistically higher suicide rates in Greece.<sup>4,6,7,9,10</sup> To help fill this gap, we undertook a 30-year interrupted time-series analysis of several abrupt and highly publicized austerity-related events and the monthly occurrence of suicide across Greece. For comparison, we also considered the impact of prosperity-related events and suicide across Greece over the same time period and investigated the potential bias of suicide under-reporting on our analyses.

## Methods

### Mortality data

We analyzed suicides that occurred in Greece from January 1, 1983 to December 31, 2012. Data were assembled as monthly counts of all suicides and monthly counts of suicide separately for males and females. Male-female differences have been demonstrated in prior studies of broad economic trends and suicide in Greece.<sup>11</sup> Suicide counts were obtained from death certificates of Greek residents who died in Greece over the study period.

National suicide data were provided by the Hellenic Statistical Authority (ELSTAT), an independent, national authority in Greece that follows European and international standards of statistical practice and data collection.<sup>12,13</sup> These data represented suicides from all mechanisms (ICD9 E-codes E950-E958) and have been used in past yearly suicide

1  
2  
3 analyses in Greece; our annual suicide counts matched those reported in these past suicide  
4 analyses.<sup>4,7,14</sup>  
5  
6

7 In Greece, violent deaths, accidents, and suspected suicides prompt investigative and data  
8 collection protocols involving police, local coroners, and public prosecutors. These legal  
9 authorities are obliged to perform inquiries and order autopsies by forensic medical  
10 doctors at state hospitals.<sup>15</sup> Death certificates in Greece must be completed before burial,  
11 despite forensic investigations that may still be ongoing. Because of this, first-line medical  
12 causes of death (or so-called R-codes, ICD-10, R00-R99) are occasionally used as  
13 placeholder diagnoses on death certificates<sup>16,17</sup> until the final cause of death (i.e., accident,  
14 suicide or homicide) can be amended following further investigation.<sup>18</sup>  
15  
16

17  
18 Despite these standard procedures, analyses of death certificate data are subject to bias  
19 that can result from inaccurately recorded causes of death. Prior studies have pointed to  
20 the misclassification of suicide as a source of bias for national analyses in numerous  
21 countries, including Greece.<sup>19-21</sup> Intentional (to avoid stigma) and unintentional (inability  
22 to determine victim intent) reasons may drive under-reporting of suicide in Greece.<sup>14</sup> In  
23 particular, the Greek Orthodox Church considers suicide a major sin and condemns suicide  
24 victims to be interred without a burial service.<sup>14,22</sup> This has caused some to contend that  
25 suicide rates in Greece are among the lowest in Europe partly because of under-reporting  
26 and misclassification for religious reasons.<sup>14,23</sup>  
27  
28

29  
30 Given this potential for misclassification, we performed a sensitivity analysis based on  
31 prior work, including a comparison of official suicide mortality statistics from ELSTAT and  
32 validated coroner death certificate data for the same suicides at the regional level (the  
33 Island of Crete).<sup>24</sup> Discrepancies between the two sources indicated that suicidal  
34 poisonings, falls, drownings, and hangings likely represented the vast majority of  
35 potentially misclassified suicides. All misclassification of suicides were under-counts; in no  
36 mechanism of suicide category was there over-counting. Remaining mechanisms of suicide  
37 were either very infrequently under-counted (i.e., firearm suicides) or very small in  
38 number (i.e., cutting/piercing suicides) and excluded from further sensitivity analyses.  
39  
40

41  
42 Having determined potentially misclassified mechanisms of suicide in our data, we then  
43 obtained monthly counts of deaths due to accidental poisonings, falls, drownings, and  
44 suffocations (ICD9 E-codes E850-869, 880-888, 910-915) from ELSTAT. Based on the prior  
45 comparison of official suicide statistics and validated coroner data at the regional level, we  
46 created a new time series where the event counts in each month were calculated as total  
47 recorded suicides across Greece plus 17.6% of all potentially misclassified accidental  
48 deaths by poisonings, falls, drownings, and suffocations across Greece. This 17.6%  
49 inflation of national suicides maintained the monthly variability in potentially misclassified  
50 accidental deaths, while increasing the average suicides per month to correspond with the  
51 overall misclassification rate found at the regional level.  
52  
53

54  
55 Thus, our final working data were comprised of four separate time series: (1) all suicides,  
56 (2) male suicides, (3) female suicides, and (4) all suicides plus potentially misclassified  
57  
58  
59  
60

1  
2  
3 suicides. Each of these time-series had 360 monthly observations in time over a 30-year  
4 study period.  
5

### 6 7 Austerity and prosperity interruptions-in-time

8 We searched news media archives and other publications to identify austerity-related and  
9 prosperity-related events that occurred in Greece during the study period and that were  
10 highly publicized and thus likely detected by the Greek public. In being highly publicized  
11 and widely known to the general public, these events were hypothesized as potentially  
12 having had an impact on the mental health and well-being of individual Greeks thereby  
13 potentially leading to increases or decreases in suicide.<sup>1,3,25-30</sup> A total of 12 such events  
14 were identified from January 1983 to December 2012. Each event was represented in the  
15 working dataset as a separate time series variable coded 0 for each month before the event  
16 occurred and coded 1 for the month the event occurred and each month thereafter (i.e., a  
17 step variable). This allowed us to treat each event as an interruption-in-time for our  
18 analyses.  
19  
20  
21

### 22 23 Statistical analyses

24 We first completed visual inspections and descriptive analyses of the four time series and  
25 the interruptions-in-time. Descriptive analyses included the calculations of sums, means,  
26 standard deviations, and linear trends.  
27

28  
29 We then conducted an interrupted time series analysis using autoregressive integrated  
30 moving average (ARIMA) models and transfer functions to test the hypothesized impact of  
31 each austerity and prosperity interruption on suicide in Greece.<sup>31,32</sup> Separately for each of  
32 our four time series, this modeling involved identifying the ARIMA model that best fit the  
33 time series and then testing each interruption variable with three commonly used transfer  
34 functions. To do this we applied a zero-order transfer function to a step variable, a first-  
35 order transfer function to a step variable, and a first-order transfer function to a  
36 differenced step variable (i.e., a pulse variable coded 1 for the month the event occurred  
37 and coded 0 for all other months). This approach allowed us to investigate the form of a  
38 given hypothesized interruption and whether it was associated with: (1) an abrupt and  
39 sustained, (2) a gradual and sustained, or (3) an abrupt but temporary, increase or  
40 decrease in the monthly counts of suicide (see Appendix). As the modeling procedure was  
41 carried out, we retained any intervention variable in our models if the p-value on its  
42 parameter was  $p < 0.05$ . After the modeling was completed, however, we used  $p < 0.01$  as the  
43 critical value for assessing the statistical significance of the effect estimates for the  
44 parameters that had been retained in the final models. This was done to account for  
45 multiple testing biases given the large number of events that were investigated as  
46 interruptions in four separate suicide time series. The mean number of additional suicides  
47 that occurred per month after a specific interruption-in-time compared to the mean  
48 number of suicides that occurred per month before the interruption-in-time were used to  
49 calculate a percent change in suicide linked to a specific prosperity or austerity  
50 interruption-in-time event.  
51  
52  
53  
54  
55

56 As part of the ARIMA modeling procedure, each time series was tested for stationarity in  
57 mean and variance. Any systematic trend in a time series was accounted for by  
58  
59  
60

1  
2  
3  
4  
5  
6  
7  
8  
9  
10  
11  
12  
13  
14  
15  
16  
17  
18  
19  
20  
21  
22  
23  
24  
25  
26  
27  
28  
29  
30  
31  
32  
33  
34  
35  
36  
37  
38  
39  
40  
41  
42  
43  
44  
45  
46  
47  
48  
49  
50  
51  
52  
53  
54  
55  
56  
57  
58  
59  
60

differencing the time series; that is, subtracting from each observation the value of a preceding observation at a lag that was indicated by conventional diagnostics. This serves to detrend a time series and make it possible to test whether it was different in level, after versus before the onset of each hypothesized interruption. For each of the four time series that were analyzed, plots of the autocorrelation function and partial autocorrelation function and the Q statistic were used to test whether the ARIMA model that was fit to each time series, before and after the transfer function modeling, produced white noise residuals.<sup>32,33</sup> SCA WorkBench Version 6.2.1 was used for the analysis (Scientific Computing Associates Corp., Villa Park, Illinois).

We used ARIMA modeling for this study because, before testing for the impact of hypothesized interruptions-in-time, the ARIMA modeling technique enabled us to fit a statistical model to the time series that accurately predicted the monthly number of suicides that occurred in Greece over the time series. It did this by predicting each monthly observation of suicides as a function of the number of suicides that occurred in one or more past months, instead of using regression covariates to try to fit a model to the suicide time series. Because ARIMA models must be identified from the time series data themselves, rather than separate regression covariates, relatively long time series, typically more than 50 observations in time, are required and most appropriate.<sup>31,32</sup> Recent, related works of longer term processes-through-time have involved yearly observations, been less than 50 total observations in time, and have been analyzed using standard regression models.<sup>11</sup> Because our dataset was a monthly time series consisting of n=360 monthly observations and our aim was to test the impact of events that were abrupt interruptions-in-time, we appropriately chose ARIMA models for our analyses.

## Results

Over our study period, from January 1, 1983 to December 31, 2012, Greece went from a population of 9.9 million to 11.1 million. Its population's life expectancy at birth went from 75 to 81 years over this 30-year period. Its GDP per capita grew from 4,787 USD in 1983 to 25,309 USD in 2012 and its unemployment rate grew from 7.6% in 1983 to 24.3% in 2012.<sup>34-38</sup>

Over the same 30 year period, 11,505 suicides, 9,079 by men and 2,426 by women, occurred in Greece. The maximum number of monthly reported suicides that occurred over the 30-year study period was 64 in July 2012, followed by 62 in May 2012. The minimum number of monthly reported suicides was 14 in both February 1983 and November 1999. Over the entire study period, linear trend analyses showed small average monthly changes of +0.005 total suicides per month, +0.01 males suicides per month, and -0.01 female suicides per month. Over the entire 30-year study period, the average monthly number of suicides was 32.0 (+/- 8.5) overall, 25.2 (+/- 7.2) for males, and 6.7 (+/- 3.3) for females. (Figure 1)

### Interruptions-in-time that were tested

We identified 12 interruptions that may have impacted suicide over the study period, 4 initial prosperity-related events and 8 subsequent austerity-related events. Prosperity-



1  
2  
3 related events began in 1997 when the International Olympic Committee announced that  
4 Greece would host the 2004 Olympic Games, through the 2000-2002 period when Greece  
5 was accepted into the Economic and Monetary Union of the European Union and launched  
6 the Euro, until 2004 when the Olympic Games occurred. The austerity-related events  
7 occurred from 2008-2012 with the start of the Greek recession<sup>39,40</sup>, through various  
8 financial bailout packages, riots, strikes, and protests, until a Greek pensioner committed a  
9 highly publicized suicide in the main square of Athens in response to austerity conditions.  
10 (Table 1)  
11  
12

### 14 Analyses of interruptions-in-time, overall and by gender

15 The total number of suicides in Greece underwent a significant, abrupt and sustained  
16 increase of 11.2 average suicides per month (37.7%) in June 2011, when the Greek  
17 government passed a second series of austerity measures ( $p=0.0004$ ). No other austerity  
18 or prosperity-related events corresponded to significant shifts in total suicides. (Table 2,  
19 Figure 2a)  
20  
21

22 The launch of the Euro currency in Greece in January 2002 marked an abrupt but  
23 temporary decrease in male suicides (-27.1%,  $p<0.05$ ), that then gradually returned to the  
24 pre-event average. Following this, the number of suicides by men in Greece underwent  
25 significant, abrupt and sustained increases of 3.2 average suicides per month (13.1%,  
26  $p=0.0009$ ) in October 2008, when the Greek recession began, and an additional 5.2 average  
27 suicides per month increase (18.5%,  $p=0.0002$ ) in June 2011. The number of suicides by  
28 men in Greece then underwent an abrupt but temporary increase of 9.8 suicides per month  
29 (29.7%,  $p=0.03$ ) in April 2012, gradually returning to the pre-event average (Table 2,  
30 Figure 2b).  
31  
32

33 Among females in Greece, the incidence of suicide experienced an abrupt and sustained  
34 increase of 2.4 average suicides per month (35.8%,  $p=0.04$ ) in May 2011. No other  
35 austerity or prosperity-related events corresponded to significant shifts in this time series.  
36 (Table 2, Figure 2c).  
37  
38

### 40 Sensitivity analyses

41 A combined total of 18,092 suicides plus potentially misclassified suicides occurred in  
42 Greece over the 30-year study period, corresponding to an average of 50.3 (+/- 10.8)  
43 fatalities per month. Sensitivity analyses of this time series revealed that the number of  
44 recorded fatalities increased significantly, abruptly and in a sustained way in June 2011 by  
45 an average of 10.2 deaths per month (20.5%,  $p=0.0004$ ). No other austerity or prosperity-  
46 related events corresponded to significant shifts in this time series. (Table 2, Figure 2d)  
47  
48

## 50 **Discussion**

51 Select austerity-related economic events in Greece corresponded to statistically significant  
52 changes in suicide. The June 2011 economic interruption was especially remarkable in that  
53 it led to significant, abrupt and sustained increases in both total suicides, by 38%, and male  
54 suicides, by 19%. Sensitivity analyses that figured in under-counting of suicides also found  
55 a significant, abrupt and sustained increase in June 2011, further reinforcing the  
56  
57  
58  
59  
60

1  
2  
3 importance of this month. An abrupt and sustained increase of borderline significance was  
4 also found for females in Greece in May 2011.  
5  
6

7 Relative to other months in which new series of austerity measures were passed by the  
8 Greek government, June 2011 may have been most significant because it was the first part  
9 of a larger austerity plan that passed by a very narrow vote. This passage occurred despite  
10 polls suggesting that the vast majority of the Greek public were opposed to the austerity  
11 plan. It also occurred amid multi-day demonstrations, that turned violent as protestors  
12 rioted outside the Greek Parliament, and strikes that halted most public services and closed  
13 Greek banks.  
14  
15

16  
17 Men in Greece also experienced a significant, abrupt and sustained 13% increase in suicide  
18 beginning in October 2008, the same month as the documented start of the recession in  
19 Greece. This well publicized start was marked by the first sustained reduction in the Greek  
20 gross domestic product and has pervaded the national public conscience ever since. As a  
21 very important contrast, men in Greece also experienced an abrupt but temporary 27%  
22 decrease in suicide with the launch of the Euro currency in Greece in January 2002.  
23 Although potentially in contrast to prior theory<sup>41,42</sup>, this suggests that positive well-  
24 publicized economic events can perhaps have a favorable effect on mental health outcomes  
25 like suicide.  
26  
27

28  
29 Increases in male suicide have been documented in other countries following economic  
30 crises. As in these other countries, Greek economic instability primarily affected men who  
31 were the predominant family income generators compared with women.<sup>14,19,43,44</sup> The  
32 sustained and statistically significant nature of the October 2008 and June 2011 increases  
33 for male suicides in Greece reveal the systemic and lasting effect that large government  
34 austerity programs can have on national economic stability and public health.  
35  
36

37 Although of borderline statistical significance, men in Greece additionally demonstrated a  
38 large, but temporary, 30% increase in suicides in April 2012. This increase in male suicide  
39 followed the highly publicized suicide of a Greek male pensioner in the main square of  
40 Athens in response to austerity conditions. Although short-lived and having a less  
41 statistically significant impact on male suicide than the prior two government-generated  
42 events, this event immediately preceded the two highest months of suicide in our entire 30  
43 year study period.  
44  
45

46  
47 The April 2012 austerity-related event was a personal tragedy, committed by an individual  
48 acting alone, not the Greek government. More importantly, this same individual's suicide  
49 was repeatedly covered across many news outlets as a stand-alone story that included the  
50 victim's name, method of suicide, precipitating life events, and quotes from a suicide note,  
51 all aspects of media reporting on suicide that have been statistically associated with or  
52 hypothesized to create copycat suicide behaviour.<sup>45</sup> Greek commentators have indeed  
53 argued that increased recognition of a possible austerity-suicide relationship created by  
54 media reports may have become a self-fulfilling prophecy<sup>4</sup> at some point after the  
55 economic crisis began. Thus, the news coverage and short-lived impact of this April 2012  
56  
57  
58  
59  
60

1  
2  
3 austerity-related event point to a media-oriented trigger for the high numbers of male  
4 suicides that occurred in the three months that followed.  
5  
6

7 Finally, women in Greece, who accounted for approximately one of every four suicides, also  
8 experienced an abrupt and sustained increase in suicides in May 2011. Although of  
9 borderline significance, this sustained increase in female suicide among women in Greece  
10 was larger, on a percentage basis, than that for males in 2011. This finding runs counter to  
11 previous research showing that economic downturns tend to result in larger increases in  
12 male, but not female, suicides.<sup>14,19</sup>  
13  
14

#### 15 Prior reports and factors related to suicide in Greece

16 Although numerous publications and commentaries have speculated in recent years about  
17 the impact of economic austerity measures on suicides in Greece, appropriate skepticism  
18 has remained as to whether this relationship is real.<sup>6</sup> These speculations, generally based  
19 on government reports, unofficial data, or the media, have placed an increase of suicides in  
20 Greece anywhere from 17-40%.<sup>1,3-5</sup> One study completed a valuable regression analysis of  
21 suicide trends in 54 countries, including Greece, although was limited in that it aggregated  
22 suicides by calendar year given the World Health Organization mortality data that were  
23 available.<sup>19</sup> This same study suggested further analyses be conducted as monthly  
24 aggregations of suicide, which we have done here for Greece. Another, more recent study  
25 concluded that fiscal austerity, as measured by yearly trends in public expenditure  
26 reductions, as well as general trends in unemployment rates and negative economic  
27 growth, led to significant increases in overall suicide rates in Greece.<sup>11</sup> Monthly  
28 interrupted time-series analyses have also been recently completed in other Southern  
29 European countries, such as Spain where an 8% increase in suicide was shown to follow  
30 the start of the financial crisis there in 2008.<sup>43</sup>  
31  
32  
33  
34  
35

36 This is the first multi-decade, national analysis of suicide in Greece using monthly data. In  
37 adjusting for underlying temporal trends, our modeling approach was able to identify the  
38 timing, nature, and magnitude of shifts in suicides that followed the announcements of  
39 acute-onset economic events. Prior analyses have provided a great deal of vital and timely  
40 new information but have been limited by smaller numbers of yearly observations over a  
41 single decade or less, or have been restricted to specific suicide subpopulations in  
42 Greece.<sup>14,19,46,47</sup> Our analysis was thus in direct response to prior commentaries calling for  
43 further processing and analysis of more complete data<sup>4</sup>, systematic, large-scale,  
44 longitudinal investigations of the effect of the economic crisis on suicide in Greece<sup>6,7,9</sup>, and  
45 the need to investigate whether a link exists between the economic crisis in Greece and  
46 suicide.<sup>7,10</sup>  
47  
48  
49

50 Despite historically having one of the lowest suicide rates in the world<sup>14</sup>, Greece is thought  
51 to have been more affected by the global financial downturn than any other European  
52 country.<sup>3</sup> The cumulative stress and lowered hopes brought on by an unrelenting and  
53 sizeable economic downturn in Greece – including high unemployment rates<sup>3</sup>, household  
54 debt, cuts to benefits, entitlements, and pensions, and increasing homelessness – may  
55 result in sustained increases in suicide.<sup>1,3,11,19,48,49</sup> Although some have argued that suicide  
56 rates in Greece do not correspond with unemployment<sup>7</sup>, the connection between economic  
57  
58  
59  
60

1  
2  
3 instability, unemployment, financial strain, loss of status, and suicide has been posited as a  
4 reasonable explanation in similarly affected countries.<sup>43</sup> Parallel increases in depression  
5 and not seeking medical care in the Greek population from 2008 to 2011 also potentially  
6 corresponded with the recession-suicide connection.<sup>3,48</sup>  
7  
8

9  
10 Because of the potential influence of these many other factors, the time-series models we  
11 employed were designed to isolate and statistically test the effects of acute, well-publicized  
12 austerity and prosperity interruptions-in-time. Through a detrending procedure, our time-  
13 series models accounted for general, long-term trends in countless temporal factors that  
14 were not directly measured – fluctuations by season, unemployment, psychiatric disorders,  
15 changes to the Greek mental healthcare system, etc.  
16

### 17 Study limitations

18 Several study limitations deserve comment. Prior studies have pointed to the  
19 misclassification of suicide as a clear source of bias in national analyses.<sup>14,19-21</sup> This is a  
20 particular issue for Greece where religious and other reasons potentially drive under-  
21 reporting of suicide.<sup>14</sup> However, it has also been shown that when comparing suicides to  
22 the patterns of accidental falls and poisonings in Greece, a large-scale misclassification  
23 masking of the true suicide rate is unlikely.<sup>7</sup> The results reported here also appear to be  
24 minimally affected by this misclassification bias; our sensitivity analyses accounting for  
25 suicide under-reporting maintained the same basic findings. Future studies might,  
26 however, conduct additional sensitivity analyses of suicide misclassification separately for  
27 men and women.  
28  
29  
30  
31

32 A second limitation was the absence of nonfatal self-directed injuries in our analysis.<sup>7</sup> One  
33 study showed a 36% increase in the number of people in Greece who reported having  
34 attempted suicide.<sup>50</sup> Although only fatal suicide data were available at a national level in  
35 Greece, and completed suicides were the main topic of prior debate, the analysis of  
36 parasuicides or attempted suicides could have produced different results, especially for  
37 certain subgroups, such as females who are known to have higher nonfatal suicide rates  
38 than males.<sup>47</sup> In general, our analysis of female suicides in Greece also proceeded with  
39 relatively small numbers per month and month-to-month changes of even a few female  
40 suicides may be detected as statistically significant. This sensitivity to small fluctuations  
41 warrants caution when interpreting our results for female suicide.  
42  
43  
44

45 More complex statistical time-series methods, such as multivariate ARIMA modeling, could  
46 also have been considered to simultaneously model relationships between two or more  
47 time series for purposes beyond what we have completed here with univariate interrupted  
48 ARIMA modeling, including to further account for unexplained variance in the dependent  
49 variable time series in order to more accurately forecast future suicides. However, if the  
50 exogenous forces that underlie a long-term trend (e.g. unemployment) are relatively  
51 constant over time, the constant term in a univariate ARIMA model will adequately  
52 represent these forces. Multivariate ARIMA models are particularly useful for forecasting,  
53 but they are not required for the testing of the impact of specific interruptions in time as  
54 we have done here.<sup>32</sup>  
55  
56  
57  
58  
59  
60

1  
2  
3 Finally, the significant shifts that we identified may have been related to the austerity  
4 measures themselves or could have been related to entirely different, but unmeasured,  
5 events that happened in the same months as our interruptions. For instance, the highly  
6 publicised pensioner suicide in Athens that we studied coincided with the announcement  
7 of the Greek elections in April 2012 that may have simultaneously contributed to economic  
8 uncertainty and perhaps the very high levels of suicide in the months that followed. While  
9 other such events from other months within our 30-year period that we did not identify  
10 may have also been important, we purposely limited the number of interruptions we tested  
11 in order to minimize multiple testing issues. Future work could incorporate co-occurring  
12 or other monthly economic interruptions, as well as additional suicide data, from later  
13 months in later years, to further test our findings.<sup>19</sup>  
14  
15  
16

### 17 Conclusions

18 Our analysis points to a significant increase in suicides following austerity-related events in  
19 Greece. As future austerity measures are considered, greater weight should be given to the  
20 unintended mental health consequences of these measures. Greater attention should also  
21 be paid to the public reporting of austerity measures and any subsequent suicide-related  
22 events that may follow. Taking the opportunity to educate the public over these events,  
23 while at the same time avoiding sensational language, unnecessarily explicit details, and  
24 undue repetition of stories, are reasonable approaches to pursue.<sup>45,51-53</sup>  
25  
26  
27

28 It has been argued that the policies of austerity implemented in Greece have been largely  
29 unscientific.<sup>1</sup> Future economic policies, and the public messaging of these policies and  
30 related events, may benefit from the findings documented here.  
31  
32  
33  
34  
35  
36  
37  
38  
39  
40  
41  
42  
43  
44  
45  
46  
47  
48  
49  
50  
51  
52  
53  
54  
55  
56  
57  
58  
59  
60

| Month          | Event type         | Description of Economic Interruption                                                                                                                                                           |
|----------------|--------------------|------------------------------------------------------------------------------------------------------------------------------------------------------------------------------------------------|
| September 1997 | Prosperity-related | International Olympic Committee announces that Greece will host the 2004 Summer Olympic Games                                                                                                  |
| June 2000      | Prosperity-related | Greece is accepted into the Economic and Monetary Union of the European Union (EU)                                                                                                             |
| January 2002   | Prosperity-related | Greece is among the first wave of European countries to launch Euro banknotes and coins                                                                                                        |
| August 2004    | Prosperity-related | Olympic Games are held in Athens, Greece                                                                                                                                                       |
| October 2008   | Austerity-related  | Start of the recession in Greece as marked by the beginning of a sustained percent reduction in national gross domestic product and protesters confronting police, who responded with tear gas |
| March 2010     | Austerity-related  | Greek government announces a series of new austerity measures amid strikes, riots, and protests                                                                                                |
| May 2010       | Austerity-related  | Greek government passes a series of new austerity measures alongside widespread stoppages, protests, riots, and violence                                                                       |
| May 2011       | Austerity-related  | Large organized public protests of austerity measures in multiple major cities across Greece                                                                                                   |
| June 2011      | Austerity-related  | Greek government passes a series of new austerity measures alongside widespread protests, strikes, riots, and violence                                                                         |
| October 2011   | Austerity-related  | Greek government passes a series of new austerity measures alongside widespread protests and strikes                                                                                           |
| February 2012  | Austerity-related  | Greek government passes a series of new austerity measures amid large protests, riots, and violence                                                                                            |
| April 2012     | Austerity-related  | Greek pensioner openly commits highly publicized suicide in the main square of Athens in response to austerity conditions                                                                      |

**Table 1.** Prosperity-related and austerity-related economic events in Greece that were tested as time-series interruptions from 1983-2012.

1  
2  
3  
4  
5  
6  
7  
8  
9  
10  
11  
12  
13  
14  
15  
16  
17  
18  
19  
20  
21  
22  
23  
24  
25  
26  
27  
28  
29  
30  
31  
32  
33  
34  
35  
36  
37  
38  
39  
40  
41  
42  
43  
44  
45  
46  
47  
48  
49  
50  
51  
52  
53  
54  
55  
56  
57  
58  
59  
60

For peer review only

1  
2  
3  
4  
5  
6  
7  
8  
9  
10  
11  
12  
13  
14  
15  
16  
17  
18  
19  
20  
21  
22  
23  
24  
25  
26  
27  
28  
29  
30  
31  
32  
33  
34  
35  
36  
37  
38  
39  
40  
41  
42  
43  
44  
45  
46  
47  
48  
49

For peer review only



1  
2  
3  
4  
5  
6  
7  
8  
9  
10  
11  
12  
13  
14  
15  
16  
17  
18  
19  
20  
21  
22  
23  
24  
25  
26  
27  
28  
29  
30  
31  
32  
33  
34  
35  
36  
37  
38  
39  
40  
41  
42  
43  
44  
45  
46  
47  
48  
49

For peer review only

1  
2  
3  
4  
5  
6  
7  
8  
9  
10  
11  
12  
13  
14  
15  
16  
17  
18  
19  
20  
21  
22  
23  
24  
25  
26  
27  
28  
29  
30  
31  
32  
33  
34  
35  
36  
37  
38  
39  
40  
41  
42  
43  
44  
45  
46  
47  
48  
49

|                | All suicide           |                       |                        |       |                        | Male suicide          |                       |                        |         |                       | Female suicide        |                       |                        |      |                       | All suicide + potentially misclassified suicides |                       |                        |        |                       |
|----------------|-----------------------|-----------------------|------------------------|-------|------------------------|-----------------------|-----------------------|------------------------|---------|-----------------------|-----------------------|-----------------------|------------------------|------|-----------------------|--------------------------------------------------|-----------------------|------------------------|--------|-----------------------|
|                | Abrupt                |                       | Gradual                |       | Abrupt                 | Abrupt                |                       | Gradual                |         | Abrupt                | Abrupt                |                       | Gradual                |      | Abrupt                | Abrupt                                           |                       | Gradual                |        | Abrupt                |
|                | perman<br>ent<br>test | perman<br>ent<br>test | Growth<br>rate<br>test | Size  | Deca<br>y rate<br>test | perman<br>ent<br>test | perman<br>ent<br>test | Growth<br>rate<br>test | Size    | Decay<br>rate<br>test | perman<br>ent<br>test | perman<br>ent<br>test | Growth<br>rate<br>test | Size | Decay<br>rate<br>test | perman<br>ent<br>test                            | perman<br>ent<br>test | Growth<br>rate<br>test | Size   | Decay<br>rate<br>test |
| September 1997 | -.42                  | .26                   | .42                    | 2.21  | .77                    | -.16                  | -.13                  | .44                    | .17     | .99                   | .15                   | .13                   | .13                    | .07  | .95                   | .58                                              | .51                   | .37                    | .08    | .62                   |
| June 2000      | -1.25                 | .01                   | 1.07                   | 2.68  | .78                    | -.05                  | .05                   | .64                    | .18     | .77                   | .87                   | -1.79                 | .94                    | .71  | .45                   | .92                                              | 1.38                  | .53                    | .14    | .88                   |
| January 2002   | -.44                  | -.51                  | -.18                   | -.38  | .83                    | -.37                  | -.77                  | -.46                   | -6.62*  | .84**                 | -.28                  | -.21                  | .53                    | 2.09 | .06                   | -1.12                                            | -3.41                 | .91                    | 1.24   | .45                   |
| August 2004    | 1.01                  | .51                   | .52                    | -2.67 | .42                    | .71                   | .27                   | .67                    | 1.33    | .82                   | .30                   | .23                   | .59                    | .24  | .74                   | .13                                              | -.16                  | .64                    | .33    | 1.01                  |
| October 2008   | 1.95                  | 3.57                  | .78                    | 4.43  | .36                    | 3.24**                | 5.30                  | .65                    | 2.01    | .03                   | 1.23                  | -1.63                 | .32                    | .43  | .68                   | .14                                              | .07                   | .82                    | .04    | 1.12                  |
| March 2010     | 12.31                 | .23                   | 1.07                   | .28   | .62                    | -.80                  | -.69                  | .44                    | 10.70   | .07                   | -1.30                 | -0.79                 | .48                    | .11  | .50                   | -3.42                                            | -3.02                 | .32                    | 7.78   | .69                   |
| May 2010       | .04                   | .10                   | .59                    | 1.50  | .75                    | -2.08                 | -1.51                 | .35                    | .15     | .69                   | -.82                  | -.23                  | .78                    | .61  | .53                   | -4.62                                            | -1.87                 | .61                    | .63    | 7.28                  |
| May 2011       | .48                   | .44                   | .60                    | .39   | .95                    | -6.02                 | -6.26                 | .24                    | .01     | .83                   | 2.37*                 | 4.31**                | .80**                  | 3.43 | .66                   | -3.81                                            | -4.27                 | .40                    | .07    | .94                   |
| June 2011      | 11.20**               | 5.87                  | .50                    | -7.68 | .20                    | 5.16**                | 10.42**               | .79**                  | 11.86** | .89**                 | -3.19                 | -5.99                 | .67                    | -5.7 | .22                   | 10.20*                                           | 6.54                  | .37                    | -6.30  | .14                   |
| September 2011 | 1.24                  | 1.30                  | .21                    | 7.33  | .59                    | -5.35                 | -3.06                 | .75                    | 8.83    | .12                   | 1.31                  | 1.83                  | .55                    | .40  | .89                   | 1.46                                             | 1.65                  | .45                    | 8.98   | .47                   |
| February 2012  | 1.69                  | 1.39                  | .52                    | -9.68 | .46                    | 8.65                  | -3.06                 | .75                    | -9.03   | .12                   | .98                   | .56                   | .49                    | .14  | 1.42                  | 2.33                                             | .12                   | 1.27                   | -10.34 | .61                   |
| April 2012     | 4.64                  | 2.39                  | .42                    | .16   | 1.70*                  | -9.03                 | -9.18                 | .04                    | 9.81*   | .78**                 | .44                   | .37                   | .43                    | .10  | -1.71                 | 6.55                                             | 6.67                  | .01                    | -.22   | .65                   |

1 Table 2. Time-series ARIMA modeling results of the impact of austerity-related and prosperity-related events on four monthly suicide time  
2 series studied in Greece from 1983-2012.  
3  
4

#### 5 FOOTNOTE

6 All suicide model: ARIMA(0,0,0)(0,1,1).12 Q(24 lags)=13.6. Male suicide model: ARIMA(0,0,0)(0,1,1).12 Q(24 lags)=21.6.  
7

8 Female suicide model: ARIMA(1,0,1)(0,1,1).12 Q(24 lags)=19.8. All suicide + potentially misclassified suicides model:  
9 ARIMA(1,0,1)(0,1,1).12 Q(24 lags)=16.2.  
10  
11

12 Size: numerator coefficient. Growth rate and decay rate: denominator coefficient. Abrupt permanent test: zero order transfer function  
13 applied to step.  
14

15 Gradual permanent test: first order transfer function applied to step. Abrupt temporary test: first order transfer function applied to pulse.  
16  
17

18 \*P<0.05 \*\*P<0.001 Boxes indicate interruptions that were statistically significant and retained in final model.  
19

20 † The coefficient was statistically significant but produced a poorly fitting estimate of the time series and thus was rejected.  
21  
22

#### 23 Contributorship statement

24 Dr. Branas conceived and oversaw the study, obtained data, conducted analyses, and wrote the manuscript. Dr. Kastanaki conceived the study, obtained  
25 data, and wrote the manuscript. Dr. Michalodimitrakis helped conceive the study, obtained data and reviewed the manuscript. Dr. Tzougas helped obtain  
26 data and reviewed the manuscript. Dr. Kranioti helped obtain data and reviewed the manuscript. Dr. Theodorakis helped conceive the study and  
27 reviewed the manuscript. Dr. Carr helped conceive the study and write the manuscript. Dr. Wiebe conceived and oversaw the study, conducted analyses,  
28 and wrote the manuscript.  
29

30 Each author listed contributed to the research and the final document and each author fulfilled all three of the ICMJE guidelines for authorship: 1)  
31 substantial contributions to conception and design, acquisition of data, or analysis and interpretation of data; 2) drafting the article or revising it critically  
32 for important intellectual content; and 3) final approval of the version to be published.  
33  
34

35 The Corresponding Author has the right to grant on behalf of all authors and does grant on behalf of all authors, an exclusive license (or non exclusive for  
36 government employees) on a worldwide basis to the BMJ Publishing Group Ltd to permit this article (if accepted) to be published in BMJ editions and any  
37 other BMJ PGL products and sublicenses such use and exploit all subsidiary rights, as set out in our license.  
38  
39

40 The authors have no competing interests.  
41  
42  
43  
44  
45

1 All authors have completed the Unified Competing Interest form and declare: no support from any organization for the submitted work; no financial  
2 relationships with any organizations that might have an interest in the submitted work in the previous three years, and no other relationships or  
3 activities that could appear to have influenced the submitted work.

4  
5 Transparency declaration: the lead author (the manuscript's guarantor) affirms that the manuscript is an honest, accurate, and transparent account of the  
6 study being reported; that no important aspects of the study have been omitted; and that any discrepancies from the study as planned (and, if relevant,  
7 registered) have been explained.

8  
9 Data sharing statement: No additional data available.

10  
11 Funding for the conduct of this study provided by the University of Athens Collaborative Center for Clinical Epidemiology and Outcomes Research (CLEO)  
12 and the Stavros Niarchos Foundation. All co-authors were independent of these funders.  
13  
14  
15  
16

## 17 **FIGURE LEGENDS**

18  
19  
20  
21 **Figure 1.** Monthly trends in suicide across Greece for all suicides, gender subcategories of suicide, and potentially misclassified suicides.

22  
23 **Figure 2.** Estimated forms (abrupt sustained, abrupt temporary) and magnitudes (%) of statistically significant monthly interruptions in  
24 four Greek suicide time series.

25 p<0.05, \*\* p<0.01, \*\*\* p<0.001

26  
27 s:  
28  
29  
30  
31  
32  
33  
34  
35  
36  
37  
38  
39  
40  
41  
42  
43  
44  
45  
46  
47  
48  
49

1  
2  
3  
4  
5  
6  
7  
8  
9  
10  
11  
12  
13  
14  
15  
16  
17  
18  
19  
20  
21  
22  
23  
24  
25  
26  
27  
28  
29  
30  
31  
32  
33  
34  
35  
36  
37  
38  
39  
40  
41  
42  
43  
44  
45  
46  
47  
48  
49

For peer review only

## References

1. Kondilis E, Giannakopoulos S, Gavana M, et al. Economic crisis, restrictive policies, and the population's health and health care: the Greek case. *Am J Public Health*. 2013;103(6):973-980.
2. Stuckler D, Meissner C, Fishback P, et al. Banking crises and mortality during the Great Depression: evidence from US urban populations, 1929-1937. *J Epidemiol Commun H*. 2011:1-10.
3. Kentikelenis A, Karanikolos M, Papanicolas I, et al. Health effects of financial crisis: omens of a Greek tragedy. *Lancet*. 2011;378:1457-1458.
4. Fountoulakis KN, Koupidis SA, Grammatikopoulos IA, Theodorakis PN. First reliable data suggest a possible increase in suicides in Greece. *BMJ*. 2013;347:1-2.
5. Stuckler D, Basu S, Suhrcke M, Coutts A, McKee M. Effects of the 2008 recession on health: a first look at European data. *Lancet*. 2011;378:124-125.
6. Hyphantis T. The "depression" of mental health care in general hospitals in Greece in the era of recession. *J Psychosomatic Research*. 2013;74:530-532.
7. Fountoulakis KN, Grammatikopoulos IA, Koupidis SA, Siamouli M, Theodorakis PN. Health and the financial crisis in Greece. *Lancet*. 2012;379:1001-1002.
8. Michas G. Suicides in Greece: a light at the end of the tunnel. *BMJ*. 2013;347:f6249.
9. Economou M, Madianos M, Theleritis C, Peppou LE, Stefanis CN. Increased suicidality amid economic crisis in Greece. *Lancet*. 2011;378:1459.
10. Horton R. Offline: Looking forward to some surprises. *Lancet*. 2011;377:2164.
11. Antonakakis N, Collins A. The impact of fiscal austerity on suicide: On the empirics of a modern Greek tragedy. *Social Science & Medicine*. 2014;112(0):39-50.
12. Anonymous. Regulation of the Statistical Obligations of the Agencies of the Hellenic Statistical System (ELSS). Piraeus: Hellenic Republic. Hellenic Statistical Authority.; 2011:1-8.
13. Anonymous. European Statistics Code of Practice for the National and Community Statistical Authorities: European Statistical System Committee; 2011:1-7.
14. Zacharakis CA, Madianos MG, Papadimitriou GN, C.N. S. Suicide in Greece 1980-1995: patterns and social factors. *Soc Psychiatry Psychiatr Epidemiology*. 1998;33:471-476.
15. Värnik P, Sisask M, Värnik A, et al. Suicide registration in eight European countries: A qualitative analysis of procedures and practices. *Forensic Science International*. 2010;202:86-92.
16. Claassen C, Yip P, Corcoran P, et al. National suicide rates a century after Durkheim: do we know enough to estimate error? *Suicide and Life-Threatening Behavior*. 2010;40:193-223.
17. Warshauer M, Monk M. Problems in suicide statistics for whites and blacks. *American Journal of Public Health*. 1978;68:383-388.
18. Rockett I, Smith G. Suicide misclassification in an international context. . Paper presented at: Proceedings of the International Collaborative Effort on Injury Statistics 1995; Hyattsville, Maryland, USA.
19. Chang S, Stuckler D, Yip P, et al. Impact of 2008 global economic crisis on suicide: time trend study in 54 countries. *BMJ*. 2013;17:347-362.
20. Branas CC, Nance ML, Elliott MR, et al. Urban-rural shifts in intentional firearm death: different causes, same results. *Am J Public Health*. Oct 2004;94(10):1750-1755.
21. Rockett I, McKinley T. Reliability and sensitivity of suicide certification in higher-income countries. *Suicide Life-Threatening Behavior*. 1999;29:141-149.
22. Stylianidou S. Terminal cancer patients and euthanasia — The church's position. *Hellenic Journal of Surgery*. 2013;85(2):105-108.
23. Kentikelenis A, Karanikolos M, Papanicolas I, et al. Health and the financial crisis in Greece — Authors' reply. *Lancet*. 2012;379:1002.

- 1  
2  
3 24. Kastanaki AE, Kranioti EF, Theodorakis PN, et al. Accuracy of official suicide mortality statistics in  
4 Greece: findings from the Island of Crete. *9th Annual Meeting of the Balkan Academy of Forensic*  
5 *Sciences (BAFS)*. Istanbul, Turkey 2013:31.
- 6  
7 25. Ifanti AA, Argyriou AA, Kalofonou FH, et al. Financial crisis and austerity measures in Greece: their  
8 impact on health promotion policies and public health care. *Health Policy*. 2013;13:154-168.
- 9  
10 26. Anonymous. Quarterly national accounts: 2nd Quarter 2013 (Provisional).  
11 [http://www.statistics.gr/portal/page/portal/ESYE/BUCKET/A0704/PressReleases/A0704\\_SEL8](http://www.statistics.gr/portal/page/portal/ESYE/BUCKET/A0704/PressReleases/A0704_SEL8)  
12 [4 DT QQ 02 2013 01 P EN.pdf](http://www.statistics.gr/portal/page/portal/ESYE/BUCKET/A0704/PressReleases/A0704_SEL8); Hellenic Statistical Authority; 2013.
- 13  
14 27. Wearden G. Greece debt crisis: timeline. *The Guardian*. May 5, 2010.
- 15  
16 28. Anonymous. Timeline: Greece's economic crisis. *Reuters*. Feb 3 and Mar 11, 2010.
- 17  
18 29. Klimes M. Timeline: Greek austerity strikes and protests. *International Business Times*. Nov 6,  
19 2013.
- 20  
21 30. Anonymous. More riots in Greece over fatal police shooting of teen. *USA Today*. Dec 7, 2008.
- 22  
23 31. Box GEP, Jenkins GM. *Time-Series Analysis: Forecasting and Control*. San Francisco: Holden-Day;  
24 1976.
- 25  
26 32. McCleary R, Hay R, Jr. *Applied time series analysis for the social sciences*. Beverly Hills: Sage; 1980.
- 27  
28 33. McDowall D, McCleary R. *Interrupted Time Series Analysis*. Vol 21. London: Sage Publishing; 1980.
- 29  
30 34. OECD. *Country statistical profile: Greece 2013/2*.
- 31  
32 35. Hellenic-Statistical-Authority. Press Release - Vital Statistics 2012. In: Division of Population and  
33 Labour Market Statistics, ed. Piraeus, Greece: Vital and Migration Statistics Section 2013.
- 34  
35 36. World-Bank. *Life expectancy at birth, total (years) 2014*.
- 36  
37 37. Index-Mundi. Greece - Life expectancy at birth. 2014;  
38 <http://www.indexmundi.com/facts/greece/life-expectancy-at-birth>.
- 39  
40 38. Index-Mundi. Greece Unemployment rate. 2014;  
41 [http://www.indexmundi.com/greece/unemployment\\_rate.html](http://www.indexmundi.com/greece/unemployment_rate.html).
- 42  
43 39. Evans-Pritchard A, Mason R. Investors shun Greek debt as shipping crisis deepens. *The Telegraph*.  
44 October 2008.
- 45  
46 40. CNN-Europe. Explainer: Why is there unrest in Greece? *CNN*. December 10, 2008.
- 47  
48 41. Stack S. Suicide: A 15-Year Review of the Sociological Literature Part I: Cultural and Economic  
49 Factors. *Suicide and Life-Threatening Behavior*. 2000;30(2):145-162.
- 50  
51 42. Marshall JR, Hodge RW. Durkheim and pierce on suicide and economic change. *Social Science*  
52 *Research*. 1981;10(2):101-114.
- 53  
54 43. Lopez Bernal JA, Gasparrini A, Artundo CM, et al. The effect of the late 2000s financial crisis on  
55 suicides in Spain: an interrupted time-series analysis. *European J Public Health*. 2013;23(5):732-  
56 736.
- 57  
58 44. Kondilis E, Ierodiakonou I, Gavana M. Suicide mortality and economic crisis in Greece: men's  
59 Achilles heel. *J Epidemiology Community Health*. 2013;67:e1.
- 60  
45. Niederkrotenthaler T, Voracek M, Herberth A, et al. Role of media reports in completed and  
prevented suicide: Werther v. Papageno effects. *British Journal of Psychiatry*. 2010;197:234-243.
46. Kastanaki AE, Kranioti EF, Papavdi A, et al. Suicide by firearms on the island of Crete. *Crisis*.  
2010;31(1):43-52.
47. Kastanaki AE, Kranioti EF, Theodorakis PN, et al. Patterns of suicide in Cretan women. In: Vieira  
DN BA, Cusack D, Beth P, editors, ed. *Acta Medicinae Legalis et Socialis*: Coimbra University Press;  
2010:157-164.
48. Faresjo A, Theodorsson E, Chatziarzenis M, et al. Higher Perceived Stress but Lower Cortisol  
Levels Found among Young Greek Adults Living in a Stressful Social Environment in Comparison  
with Swedish Young Adults. *Plos One*. 2013;8(9):1-8.

- 1  
2  
3  
4 49. Simou E, Koutsogeorgou E. Effects of the economic crisis on health and healthcare in Greece in the  
5 literature from 2009 to 2013: A systematic review. *Health Policy*. 2014;115(2-3):111-119.  
6 50. Madianos M, Economou M, Alexiou T, et al. Depression and economic hardship across Greece in  
7 2008 and 2009: two cross-sectional surveys nationwide. *Soc Psychiatry Psychiatr Epidemiology*.  
8 2011;46:943-952.  
9 51. O'Toole ME. A different perspective on the UCSB mass murder. *Violence and gender*. 2014;1(2):49-  
10 50.  
11 52. Pirkis J, Francis C, Blood R, et al. Reporting of suicide in the Australian media. *Aust N Z J Psychiatry*.  
12 2002;36:190-197.  
13 53. World-Health-Organization. Preventing suicide. A resource for media professionals. In: Report-of-  
14 WHO-Department-of-Mental-Health-and-Substance-Abuse, ed. Geneva, Switzerland: WHO Library;  
15 2008:1-18.  
16  
17  
18  
19  
20  
21  
22  
23  
24  
25  
26  
27  
28  
29  
30  
31  
32  
33  
34  
35  
36  
37  
38  
39  
40  
41  
42  
43  
44  
45  
46  
47  
48  
49  
50  
51  
52  
53  
54  
55  
56  
57  
58  
59  
60



1  
2  
3 **The impact of economic austerity and prosperity events on suicide in Greece: a 30-**  
4 **year interrupted time-series analysis**  
5  
6

7 Charles C. Branas, PhD  
8 Professor of Epidemiology, University of Pennsylvania  
9 Philadelphia, USA  
10 cbranas@upenn.edu  
11

12  
13 Anastasia E. Kastanaki, PhD  
14 Clinical Psychologist, Faculty of Medicine, University of Crete  
15 Iraklion, Greece  
16 ankastanaki@yahoo.gr  
17

18  
19 Manolis Michalodimitrakis, MD, JD  
20 Professor of Forensic Pathology, University of Crete  
21 Iraklion, Greece  
22 michalom2@gmail.com  
23

24  
25 John Tzougas, PhD  
26 Director General of the Hellenic Statistical Authority, Hellenic Statistical Authority  
27 Piraeus, Greece  
28 jotzo@otenet.gr  
29

30  
31 Elena F. Kranioti, MD, PhD  
32 Lecturer, Forensic Anthropology, University of Edinburgh  
33 Edinburgh, United Kingdom  
34 elena.kranioti@ed.ac.uk  
35

36  
37 Pavlos N. Theodorakis, MD, PhD  
38 CEO and Chairman of Attica Mental Health Hospitals Trust, WHO National Counterpart for  
39 Mental Health  
40 Athens, Greece  
41 theodorakispavlos@gmail.com  
42  
43

44  
45 Brendan G. Carr, MD, MA, MS  
46 Assistant Professor of Emergency Medicine, University of Pennsylvania  
47 Philadelphia, USA  
48 carrb@mail.med.upenn.edu  
49

50  
51 Douglas J. Wiebe, PhD  
52 Associate Professor of Epidemiology, University of Pennsylvania  
53 Philadelphia, USA  
54 dwiebe@mail.med.upenn.edu  
55  
56  
57  
58  
59  
60

1  
2  
3 Corresponding author contact information:

4 Charles C. Branas, PhD  
5 Professor of Epidemiology  
6 University of Pennsylvania  
7 Department of Biostatistics and Epidemiology  
8 Blockley Hall, 423 Guardian Drive  
9 Philadelphia, PA 19104-6021 USA  
10 Email: cbranas@upenn.edu  
11

12  
13 Contributorship statement

14 Dr. Branas conceived and oversaw the study, obtained data, conducted analyses, and wrote the  
15 manuscript. Dr. Kastanaki conceived the study, obtained data, and wrote the manuscript. Dr.  
16 Michalodimitrakis helped conceive the study, obtained data and reviewed the manuscript. Dr.  
17 Tzougas helped obtain data and reviewed the manuscript. Dr. Kranioti helped obtain data and  
18 reviewed the manuscript. Dr. Theodorakis helped conceive the study and reviewed the manuscript.  
19 Dr. Carr helped conceive the study and write the manuscript. Dr. Wiebe conceived and oversaw the  
20 study, conducted analyses, and wrote the manuscript.  
21

22  
23 Each author listed contributed to the research and the final document and each author fulfilled all  
24 three of the ICMJE guidelines for authorship: 1) substantial contributions to conception and design,  
25 acquisition of data, or analysis and interpretation of data; 2) drafting the article or revising it  
26 critically for important intellectual content; and 3) final approval of the version to be published.  
27

28  
29 The Corresponding Author has the right to grant on behalf of all authors and does grant on behalf of  
30 all authors, an exclusive license (or non exclusive for government employees) on a worldwide basis  
31 to the BMJ Publishing Group Ltd to permit this article (if accepted) to be published in BMJ editions  
32 and any other BMJ PGL products and sublicenses such use and exploit all subsidiary rights, as set  
33 out in our license.  
34

35 The authors have no competing interests.  
36

37 All authors have completed the Unified Competing Interest form and declare: no support from any  
38 organization for the submitted work; no financial relationships with any organizations that might  
39 have an interest in the submitted work in the previous three years, and no other relationships or  
40 activities that could appear to have influenced the submitted work.  
41

42  
43 Transparency declaration: the lead author (the manuscript's guarantor) affirms that the manuscript  
44 is an honest, accurate, and transparent account of the study being reported; that no important  
45 aspects of the study have been omitted; and that any discrepancies from the study as planned (and,  
46 if relevant, registered) have been explained.  
47

48 Data sharing statement: No additional data available.  
49

50 Funding for the conduct of this study provided by the University of Athens Collaborative Center for  
51 Clinical Epidemiology and Outcomes Research (CLEO) and the Stavros Niarchos Foundation. All co-  
52 authors were independent of these funders.  
53

54  
55 Key words: economic policy, mental health, suicide, injury, time-series  
56  
57  
58  
59  
60

## The impact of economic austerity and prosperity events on suicide in Greece: a 30-year interrupted time-series analysis

### Abstract

#### Objectives:

To complete a 30-year interrupted time-series analysis of the impact of austerity-related and prosperity-related events on the occurrence of suicide across Greece.

#### Setting:

Greece from January 1, 1983 to December 31, 2012.

#### Participants:

A total of 11,505 suicides, 9,079 by men and 2,426 by women, occurring in Greece over the study period.

#### Primary and secondary outcomes:

National data from the Hellenic Statistical Authority assembled as 360 monthly counts of: all suicides, male suicides, female suicides, and all suicides plus potentially misclassified suicides.

#### Results:

In 30 years, the highest months of suicide in Greece occurred in 2012. The passage of new austerity measures in June 2011 marked the beginning of significant, abrupt and sustained increases in total suicides (+37.7%,  $p < 0.001$ ) and male suicides (+18.5%,  $p < 0.01$ ). Sensitivity analyses that figured in under-counting of suicides also found a significant, abrupt and sustained increase in June 2011 (+20.5%,  $p < 0.001$ ). Suicides by men in Greece also underwent a significant, abrupt and sustained increase in October 2008 when the Greek recession began (+13.1%,  $p < 0.01$ ), and an abrupt but temporary increase in April 2012 following a public suicide committed in response to austerity conditions (+29.7%,  $p < 0.05$ ). Suicides by women in Greece also underwent an abrupt and sustained increase in May 2011 following austerity-related events (+35.8%,  $p < 0.05$ ). One prosperity-related event, the January 2002 launch of the Euro in Greece, marked an abrupt but temporary decrease in male suicides (-27.1%,  $p < 0.05$ ).

#### Conclusions:

This is the first multi-decade, national analysis of suicide in Greece using monthly data. Select austerity-related events in Greece corresponded to statistically significant increases for suicides overall, as well as for suicides among men and women. The consideration of future austerity measures should give greater weight to the unintended mental health consequences that may follow and the public messaging of these policies and related events.

## Strengths and limitations of this study

Strengths include:

- The first multi-decade, national analysis of suicide in Greece using monthly data
- The first analysis of suicide in Greece incorporating the latest official data from 2012
- The first robust statistical interrupted time-series study of specific prosperity and austerity-related events on suicide in Greece (and not simply yearly analyses of general trends)
- The first robust statistical time-series tests of the abrupt effects of *both* prosperity and austerity-related events on suicide
- The first statistical tests and findings concerning the effect of austerity-related media and press coverage on suicides in Greece
- The first time-series study of suicide to include a sensitivity analyses that figures in under-counting and misclassification of suicides

Limitations include:

- The absence of nonfatal self-directed injuries in our analysis
- Our analysis of female suicides in Greece proceeded with relatively small numbers per month
- The significant shifts that we identified may have been related to the austerity measures themselves or could have been related to different, but unmeasured, events that happened in the same months as our interruptions

## Introduction

The ongoing economic crisis in developed nations is the worst since the Great Depression<sup>1,2</sup> and Greece is thought to have been more affected than any other European country.<sup>3</sup> Numerous academic articles and commentaries have been published in recent years speculating about the impact of recent economic austerity measures in Greece.<sup>1,3-5</sup> These austerity measures followed numerous economic inconsistencies in the national finances of the Greek state that have been viewed as a foundational economic crisis affecting the European economy and, by extension, the world economy.

The weight of this crisis situation and the Greek austerity measures have been highly publicized around the world. Not surprisingly, this publicity and the toxic economic conditions accompanying the austerity measures have also become the leading source of public consternation in Greece itself, exacting considerable stress and strain on the Greek public.<sup>1,4</sup> Everyday citizens in Greece have faced an increasingly bleak crisis and their local media outlets discuss little else. National debt reduction strategies and new austerity measures are publicly, and often abruptly, announced and then followed by large demonstrations, labor strikes, riots, and police actions.

The strain on the Greek public that has persisted for several years now has prompted academic discussion of the potential health effects of the austerity measures. In this regard, fluctuations of suicides in Greece have been a lead topic of discussion, with numerous commentators concluding that the recent austerity measures have indeed led to increased suicides in Greece. This conclusion has, however, been appropriately met with skepticism<sup>6,7,8</sup> and no large-scale, systematic longitudinal analysis has yet been completed to inform the ongoing debate as to whether austerity measures have led to statistically higher suicide rates in Greece.<sup>4,6,7,9,10</sup> To help fill this gap, we undertook a 30-year interrupted time-series analysis of several abrupt and highly publicized austerity-related events and the monthly occurrence of suicide across Greece. For comparison, we also considered the impact of prosperity-related events and suicide across Greece over the same time period and investigated the potential bias of suicide under-reporting on our analyses.

## Methods

### Mortality data

We analyzed suicides that occurred in Greece from January 1, 1983 to December 31, 2012. Data were assembled as monthly counts of all suicides and monthly counts of suicide separately for males and females. Male-female differences have been demonstrated in prior studies of broad economic trends and suicide in Greece.<sup>11</sup> Suicide counts were obtained from death certificates of Greek residents who died in Greece over the study period.

National suicide data were provided by the Hellenic Statistical Authority (ELSTAT), an independent, national authority in Greece that follows European and international standards of statistical practice and data collection.<sup>12,13</sup> These data represented suicides from all mechanisms (ICD9 E-codes E950-E958) and have been used in past yearly suicide

1  
2  
3 analyses in Greece; our annual suicide counts matched those reported in these past suicide  
4 analyses.<sup>4,7,14</sup>  
5  
6

7 In Greece, violent deaths, accidents, and suspected suicides prompt investigative and data  
8 collection protocols involving police, local coroners, and public prosecutors. These legal  
9 authorities are obliged to perform inquiries and order autopsies by forensic medical  
10 doctors at state hospitals.<sup>15</sup> Death certificates in Greece must be completed before burial,  
11 despite forensic investigations that may still be ongoing. Because of this, first-line medical  
12 causes of death (or so-called R-codes, ICD-10, R00-R99) are occasionally used as  
13 placeholder diagnoses on death certificates<sup>16,17</sup> until the final cause of death (i.e., accident,  
14 suicide or homicide) can be amended following further investigation.<sup>18</sup>  
15  
16

17  
18 Despite these standard procedures, analyses of death certificate data are subject to bias  
19 that can result from inaccurately recorded causes of death. Prior studies have pointed to  
20 the misclassification of suicide as a source of bias for national analyses in numerous  
21 countries, including Greece.<sup>19-21</sup> Intentional (to avoid stigma) and unintentional (inability  
22 to determine victim intent) reasons may drive under-reporting of suicide in Greece.<sup>14</sup> In  
23 particular, the Greek Orthodox Church considers suicide a major sin and condemns suicide  
24 victims to be interred without a burial service.<sup>14,22</sup> This has caused some to contend that  
25 suicide rates in Greece are among the lowest in Europe partly because of under-reporting  
26 and misclassification for religious reasons.<sup>14,23</sup>  
27  
28

29  
30 Given this potential for misclassification, we performed a sensitivity analysis based on  
31 prior work, including a comparison of official suicide mortality statistics from ELSTAT and  
32 validated coroner death certificate data for the same suicides at the regional level (the  
33 Island of Crete).<sup>24</sup> Discrepancies between the two sources indicated that suicidal  
34 poisonings, falls, drownings, and hangings likely represented the vast majority of  
35 potentially misclassified suicides. All misclassification of suicides were under-counts; in no  
36 mechanism of suicide category was there over-counting. Remaining mechanisms of suicide  
37 were either very infrequently under-counted (i.e., firearm suicides) or very small in  
38 number (i.e., cutting/piercing suicides) and excluded from further sensitivity analyses.  
39  
40

41  
42 Having determined potentially misclassified mechanisms of suicide in our data, we then  
43 obtained monthly counts of deaths due to accidental poisonings, falls, drownings, and  
44 suffocations (ICD9 E-codes E850-869, 880-888, 910-915) from ELSTAT. Based on the prior  
45 comparison of official suicide statistics and validated coroner data at the regional level, we  
46 created a new time series where the event counts in each month were calculated as total  
47 recorded suicides across Greece plus 17.6% of all potentially misclassified accidental  
48 deaths by poisonings, falls, drownings, and suffocations across Greece. This 17.6%  
49 inflation of national suicides maintained the monthly variability in potentially misclassified  
50 accidental deaths, while increasing the average suicides per month to correspond with the  
51 overall misclassification rate found at the regional level.  
52  
53

54  
55 Thus, our final working data were comprised of four separate time series: (1) all suicides,  
56 (2) male suicides, (3) female suicides, and (4) all suicides plus potentially misclassified  
57  
58  
59  
60

1  
2  
3 suicides. Each of these time-series had 360 monthly observations in time over a 30-year  
4 study period.  
5  
6

### 7 Austerity and prosperity interruptions-in-time

8 We searched news media archives and other publications to identify austerity-related and  
9 prosperity-related events that occurred in Greece during the study period and that were  
10 highly publicized and thus likely detected by the Greek public. In being highly publicized  
11 and widely known to the general public, these events were hypothesized as potentially  
12 having had an impact on the mental health and well-being of individual Greeks thereby  
13 potentially leading to increases or decreases in suicide.<sup>1,3,25-30</sup> A total of 12 such events  
14 were identified from January 1983 to December 2012. Each event was represented in the  
15 working dataset as a separate time series variable coded 0 for each month before the event  
16 occurred and coded 1 for the month the event occurred and each month thereafter (i.e., a  
17 step variable). This allowed us to treat each event as an interruption-in-time for our  
18 analyses.  
19  
20  
21

### 22 Statistical analyses

23 We first completed visual inspections and descriptive analyses of the four time series and  
24 the interruptions-in-time. Descriptive analyses included the calculations of sums, means,  
25 standard deviations, and linear trends.  
26  
27

28  
29 We then conducted an interrupted time series analysis using autoregressive integrated  
30 moving average (ARIMA) models and transfer functions to test the hypothesized impact of  
31 each austerity and prosperity interruption on suicide in Greece.<sup>31,32</sup> Separately for each of  
32 our four time series, this modeling involved identifying the ARIMA model that best fit the  
33 time series and then testing each interruption variable with three commonly used transfer  
34 functions. To do this we applied a zero-order transfer function to a step variable, a first-  
35 order transfer function to a step variable, and a first-order transfer function to a  
36 differenced step variable (i.e., a pulse variable coded 1 for the month the event occurred  
37 and coded 0 for all other months). This approach allowed us to investigate the form of a  
38 given hypothesized interruption and whether it was associated with: (1) an abrupt and  
39 sustained, (2) a gradual and sustained, or (3) an abrupt but temporary, increase or  
40 decrease in the monthly counts of suicide (see Appendix). As the modeling procedure was  
41 carried out, we retained any intervention variable in our models if the p-value on its  
42 parameter was  $p < 0.05$ . After the modeling was completed, however, we used  $p < 0.01$  as the  
43 critical value for assessing the statistical significance of the effect estimates for the  
44 parameters that had been retained in the final models. This was done to account for  
45 multiple testing biases given the large number of events that were investigated as  
46 interruptions in four separate suicide time series. The mean number of additional suicides  
47 that occurred per month after a specific interruption-in-time compared to the mean  
48 number of suicides that occurred per month before the interruption-in-time were used to  
49 calculate a percent change in suicide linked to a specific prosperity or austerity  
50 interruption-in-time event.  
51  
52  
53  
54  
55

56 As part of the ARIMA modeling procedure, each time series was tested for stationarity in  
57 mean and variance. Any systematic trend in a time series was accounted for by  
58  
59  
60

1  
2  
3  
4  
5  
6  
7  
8  
9  
10  
11  
12  
13  
14  
differencing the time series; that is, subtracting from each observation the value of a preceding observation at a lag that was indicated by conventional diagnostics. This serves to detrend a time series and make it possible to test whether it was different in level, after versus before the onset of each hypothesized interruption. For each of the four time series that were analyzed, plots of the autocorrelation function and partial autocorrelation function and the Q statistic were used to test whether the ARIMA model that was fit to each time series, before and after the transfer function modeling, produced white noise residuals.<sup>32,33</sup> SCA WorkBench Version 6.2.1 was used for the analysis (Scientific Computing Associates Corp., Villa Park, Illinois).

15  
16  
17  
18  
19  
20  
21  
22  
23  
24  
25  
26  
27  
28  
29  
30  
31  
32  
33  
We used ARIMA modeling for this study because, before testing for the impact of hypothesized interruptions-in-time, the ARIMA modeling technique enabled us to fit a statistical model to the time series that accurately predicted the monthly number of suicides that occurred in Greece over the time series. It did this by predicting each monthly observation of suicides as a function of the number of suicides that occurred in one or more past months, instead of using regression covariates to try to fit a model to the suicide time series. Because ARIMA models must be identified from the time series data themselves, rather than separate regression covariates, relatively long time series, typically more than 50 observations in time, are required and most appropriate.<sup>31,32</sup> Recent, related works of longer term processes-through-time have involved yearly observations, been less than 50 total observations in time, and have been analyzed using standard regression models.<sup>11</sup> Because our dataset was a monthly time series consisting of n=360 monthly observations and our aim was to test the impact of events that were abrupt interruptions-in-time, we appropriately chose ARIMA models for our analyses.

## 34 35 36 37 38 39 40 41 42 43 44 45 46 47 48 49 50 51 52 53 54 55 56 57 58 59 60

### Results

Over our study period, from January 1, 1983 to December 31, 2012, Greece went from a population of 9.9 million to 11.1 million. Its population's life expectancy at birth went from 75 to 81 years over this 30-year period. Its GDP per capita grew from 4,787 USD in 1983 to 25,309 USD in 2012 and its unemployment rate grew from 7.6% in 1983 to 24.3% in 2012.<sup>34-38</sup>

Over the same 30 year period, 11,505 suicides, 9,079 by men and 2,426 by women, occurred in Greece. The maximum number of monthly reported suicides that occurred over the 30-year study period was 64 in July 2012, followed by 62 in May 2012. The minimum number of monthly reported suicides was 14 in both February 1983 and November 1999. Over the entire study period, linear trend analyses showed small average monthly changes of +0.005 total suicides per month, +0.01 males suicides per month, and -0.01 female suicides per month. Over the entire 30-year study period, the average monthly number of suicides was 32.0 (+/- 8.5) overall, 25.2 (+/- 7.2) for males, and 6.7 (+/- 3.3) for females. (Figure 1)

#### Interruptions-in-time that were tested

We identified 12 interruptions that may have impacted suicide over the study period, 4 initial prosperity-related events and 8 subsequent austerity-related events. Prosperity-



1  
2  
3 related events began in 1997 when the International Olympic Committee announced that  
4 Greece would host the 2004 Olympic Games, through the 2000-2002 period when Greece  
5 was accepted into the Economic and Monetary Union of the European Union and launched  
6 the Euro, until 2004 when the Olympic Games occurred. The austerity-related events  
7 occurred from 2008-2012 with the start of the Greek recession<sup>39,40</sup>, through various  
8 financial bailout packages, riots, strikes, and protests, until a Greek pensioner committed a  
9 highly publicized suicide in the main square of Athens in response to austerity conditions.  
10 (Table 1)  
11  
12

#### 14 Analyses of interruptions-in-time, overall and by gender

15 The total number of suicides in Greece underwent a significant, abrupt and sustained  
16 increase of 11.2 average suicides per month (37.7%) in June 2011, when the Greek  
17 government passed a second series of austerity measures ( $p=0.0004$ ). No other austerity  
18 or prosperity-related events corresponded to significant shifts in total suicides. (Table 2,  
19 Figure 2a)  
20  
21

22 The launch of the Euro currency in Greece in January 2002 marked an abrupt but  
23 temporary decrease in male suicides (-27.1%,  $p<0.05$ ), that then gradually returned to the  
24 pre-event average. Following this, the number of suicides by men in Greece underwent  
25 significant, abrupt and sustained increases of 3.2 average suicides per month (13.1%,  
26  $p=0.0009$ ) in October 2008, when the Greek recession began, and an additional 5.2 average  
27 suicides per month increase (18.5%,  $p=0.0002$ ) in June 2011. The number of suicides by  
28 men in Greece then underwent an abrupt but temporary increase of 9.8 suicides per month  
29 (29.7%,  $p=0.03$ ) in April 2012, gradually returning to the pre-event average (Table 2,  
30 Figure 2b).  
31  
32  
33

34 Among females in Greece, the incidence of suicide experienced an abrupt and sustained  
35 increase of 2.4 average suicides per month (35.8%,  $p=0.04$ ) in May 2011. No other  
36 austerity or prosperity-related events corresponded to significant shifts in this time series.  
37 (Table 2, Figure 2c).  
38  
39

#### 40 Sensitivity analyses

41 A combined total of 18,092 suicides plus potentially misclassified suicides occurred in  
42 Greece over the 30-year study period, corresponding to an average of 50.3 (+/- 10.8)  
43 fatalities per month. Sensitivity analyses of this time series revealed that the number of  
44 recorded fatalities increased significantly, abruptly and in a sustained way in June 2011 by  
45 an average of 10.2 deaths per month (20.5%,  $p=0.0004$ ). No other austerity or prosperity-  
46 related events corresponded to significant shifts in this time series. (Table 2, Figure 2d)  
47  
48  
49

#### 50 **Discussion**

51 Select austerity-related economic events in Greece corresponded to statistically significant  
52 changes in suicide. The June 2011 economic interruption was especially remarkable in that  
53 it led to significant, abrupt and sustained increases in both total suicides, by 38%, and male  
54 suicides, by 19%. Sensitivity analyses that figured in under-counting of suicides also found  
55 a significant, abrupt and sustained increase in June 2011, further reinforcing the  
56  
57  
58  
59  
60

1  
2  
3 importance of this month. An abrupt and sustained increase of borderline significance was  
4 also found for females in Greece in May 2011.  
5  
6

7 Relative to other months in which new series of austerity measures were passed by the  
8 Greek government, June 2011 may have been most significant because it was the first part  
9 of a larger austerity plan that passed by a very narrow vote. This passage occurred despite  
10 polls suggesting that the vast majority of the Greek public were opposed to the austerity  
11 plan. It also occurred amid multi-day demonstrations, that turned violent as protestors  
12 rioted outside the Greek Parliament, and strikes that halted most public services and closed  
13 Greek banks.  
14  
15

16  
17 Men in Greece also experienced a significant, abrupt and sustained 13% increase in suicide  
18 beginning in October 2008, the same month as the documented start of the recession in  
19 Greece. This well publicized start was marked by the first sustained reduction in the Greek  
20 gross domestic product and has pervaded the national public conscience ever since. As a  
21 very important contrast, men in Greece also experienced an abrupt but temporary 27%  
22 decrease in suicide with the launch of the Euro currency in Greece in January 2002.  
23 Although potentially in contrast to prior theory<sup>41,42</sup>, this suggests that positive well-  
24 publicized economic events can perhaps have a favorable effect on mental health outcomes  
25 like suicide.  
26  
27

28  
29 Increases in male suicide have been documented in other countries following economic  
30 crises. As in these other countries, Greek economic instability primarily affected men who  
31 were the predominant family income generators compared with women.<sup>14,19,43,44</sup> The  
32 sustained and statistically significant nature of the October 2008 and June 2011 increases  
33 for male suicides in Greece reveal the systemic and lasting effect that large government  
34 austerity programs can have on national economic stability and public health.  
35  
36

37 Although of borderline statistical significance, men in Greece additionally demonstrated a  
38 large, but temporary, 30% increase in suicides in April 2012. This increase in male suicide  
39 followed the highly publicized suicide of a Greek male pensioner in the main square of  
40 Athens in response to austerity conditions. Although short-lived and having a less  
41 statistically significant impact on male suicide than the prior two government-generated  
42 events, this event immediately preceded the two highest months of suicide in our entire 30  
43 year study period.  
44  
45

46  
47 The April 2012 austerity-related event was a personal tragedy, committed by an individual  
48 acting alone, not the Greek government. More importantly, this same individual's suicide  
49 was repeatedly covered across many news outlets as a stand-alone story that included the  
50 victim's name, method of suicide, precipitating life events, and quotes from a suicide note,  
51 all aspects of media reporting on suicide that have been statistically associated with or  
52 hypothesized to create copycat suicide behaviour.<sup>45</sup> Greek commentators have indeed  
53 argued that increased recognition of a possible austerity-suicide relationship created by  
54 media reports may have become a self-fulfilling prophecy<sup>4</sup> at some point after the  
55 economic crisis began. Thus, the news coverage and short-lived impact of this April 2012  
56  
57  
58  
59  
60

1  
2  
3 austerity-related event point to a media-oriented trigger for the high numbers of male  
4 suicides that occurred in the three months that followed.  
5  
6

7 Finally, women in Greece, who accounted for approximately one of every four suicides, also  
8 experienced an abrupt and sustained increase in suicides in May 2011. Although of  
9 borderline significance, this sustained increase in female suicide among women in Greece  
10 was larger, on a percentage basis, than that for males in 2011. This finding runs counter to  
11 previous research showing that economic downturns tend to result in larger increases in  
12 male, but not female, suicides.<sup>14,19</sup>  
13  
14

#### 15 Prior reports and factors related to suicide in Greece

16 Although numerous publications and commentaries have speculated in recent years about  
17 the impact of economic austerity measures on suicides in Greece, appropriate skepticism  
18 has remained as to whether this relationship is real.<sup>6</sup> These speculations, generally based  
19 on government reports, unofficial data, or the media, have placed an increase of suicides in  
20 Greece anywhere from 17-40%.<sup>1,3-5</sup> One study completed a valuable regression analysis of  
21 suicide trends in 54 countries, including Greece, although was limited in that it aggregated  
22 suicides by calendar year given the World Health Organization mortality data that were  
23 available.<sup>19</sup> This same study suggested further analyses be conducted as monthly  
24 aggregations of suicide, which we have done here for Greece. **Another, more recent study**  
25 **concluded that fiscal austerity, as measured by yearly trends in public expenditure**  
26 **reductions, as well as general trends in unemployment rates and negative economic**  
27 **growth, led to significant increases in overall suicide rates in Greece.<sup>11</sup>** Monthly  
28 interrupted time-series analyses have also been recently completed in other Southern  
29 European countries, such as Spain where an 8% increase in suicide was shown to follow  
30 the start of the financial crisis there in 2008.<sup>43</sup>  
31  
32  
33  
34  
35

36 This is the first multi-decade, national analysis of suicide in Greece using monthly data. In  
37 adjusting for underlying temporal trends, our modeling approach was able to identify the  
38 timing, nature, and magnitude of shifts in suicides that followed the announcements of  
39 acute-onset economic events. Prior analyses have provided a great deal of vital and timely  
40 new information but have been limited by smaller numbers of yearly observations over a  
41 single decade or less, or have been restricted to specific suicide subpopulations in  
42 Greece.<sup>14,19,46,47</sup> Our analysis was thus in direct response to prior commentaries calling for  
43 further processing and analysis of more complete data<sup>4</sup>, systematic, large-scale,  
44 longitudinal investigations of the effect of the economic crisis on suicide in Greece<sup>6,7,9</sup>, and  
45 the need to investigate whether a link exists between the economic crisis in Greece and  
46 suicide.<sup>7,10</sup>  
47  
48  
49

50 Despite historically having one of the lowest suicide rates in the world<sup>14</sup>, Greece is thought  
51 to have been more affected by the global financial downturn than any other European  
52 country.<sup>3</sup> **The cumulative stress and lowered hopes brought on by an unrelenting and**  
53 **sizeable economic downturn in Greece – including high unemployment rates<sup>3</sup>, household**  
54 **debt, cuts to benefits, entitlements, and pensions, and increasing homelessness – may**  
55 **result in sustained increases in suicide.<sup>1,3,11,19,48,49</sup>** Although some have argued that suicide  
56 rates in Greece do not correspond with unemployment<sup>7</sup>, the connection between economic  
57  
58  
59  
60

1  
2  
3 instability, unemployment, financial strain, loss of status, and suicide has been posited as a  
4 reasonable explanation in similarly affected countries.<sup>43</sup> Parallel increases in depression  
5 and not seeking medical care in the Greek population from 2008 to 2011 also potentially  
6 corresponded with the recession-suicide connection.<sup>3,48</sup>  
7  
8

9  
10 Because of the potential influence of these many other factors, the time-series models we  
11 employed were designed to isolate and statistically test the effects of acute, well-publicized  
12 austerity and prosperity interruptions-in-time. Through a detrending procedure, our time-  
13 series models accounted for general, long-term trends in countless temporal factors that  
14 were not directly measured – fluctuations by season, unemployment, psychiatric disorders,  
15 changes to the Greek mental healthcare system, etc.  
16

### 17 Study limitations

18 Several study limitations deserve comment. Prior studies have pointed to the  
19 misclassification of suicide as a clear source of bias in national analyses.<sup>14,19-21</sup> This is a  
20 particular issue for Greece where religious and other reasons potentially drive under-  
21 reporting of suicide.<sup>14</sup> However, it has also been shown that when comparing suicides to  
22 the patterns of accidental falls and poisonings in Greece, a large-scale misclassification  
23 masking of the true suicide rate is unlikely.<sup>7</sup> The results reported here also appear to be  
24 minimally affected by this misclassification bias; our sensitivity analyses accounting for  
25 suicide under-reporting maintained the same basic findings. **Future studies might,**  
26 **however, conduct additional sensitivity analyses of suicide misclassification separately for**  
27 **men and women.**  
28  
29  
30  
31

32 A second limitation was the absence of nonfatal self-directed injuries in our analysis.<sup>7</sup> One  
33 study showed a 36% increase in the number of people in Greece who reported having  
34 attempted suicide.<sup>50</sup> Although only fatal suicide data were available at a national level in  
35 Greece, and completed suicides were the main topic of prior debate, the analysis of  
36 parasuicides or attempted suicides could have produced different results, especially for  
37 certain subgroups, such as females who are known to have higher nonfatal suicide rates  
38 than males.<sup>47</sup> In general, our analysis of female suicides in Greece also proceeded with  
39 relatively small numbers per month and month-to-month changes of even a few female  
40 suicides may be detected as statistically significant. This sensitivity to small fluctuations  
41 warrants caution when interpreting our results for female suicide.  
42  
43  
44

45 **More complex statistical time-series methods, such as multivariate ARIMA modeling, could**  
46 **also have been considered to simultaneously model relationships between two or more**  
47 **time series for purposes beyond what we have completed here with univariate interrupted**  
48 **ARIMA modeling, including to further account for unexplained variance in the dependent**  
49 **variable time series in order to more accurately forecast future suicides. However, if the**  
50 **exogenous forces that underlie a long-term trend (e.g. unemployment) are relatively**  
51 **constant over time, the constant term in a univariate ARIMA model will adequately**  
52 **represent these forces. Multivariate ARIMA models are particularly useful for forecasting,**  
53 **but they are not required for the testing of the impact of specific interruptions in time as**  
54 **we have done here.**<sup>32</sup>  
55  
56  
57  
58  
59  
60

1  
2  
3 Finally, the significant shifts that we identified may have been related to the austerity  
4 measures themselves or could have been related to entirely different, but unmeasured,  
5 events that happened in the same months as our interruptions. For instance, the highly  
6 publicised pensioner suicide in Athens that we studied coincided with the announcement  
7 of the Greek elections in April 2012 that may have simultaneously contributed to economic  
8 uncertainty and perhaps the very high levels of suicide in the months that followed. While  
9 other such events from other months within our 30-year period that we did not identify  
10 may have also been important, we purposely limited the number of interruptions we tested  
11 in order to minimize multiple testing issues. Future work could incorporate co-occurring  
12 or other monthly economic interruptions, as well as additional suicide data, from later  
13 months in later years, to further test our findings.<sup>19</sup>  
14  
15  
16

### 17 Conclusions

18 Our analysis points to a significant increase in suicides following austerity-related events in  
19 Greece. As future austerity measures are considered, greater weight should be given to the  
20 unintended mental health consequences of these measures. Greater attention should also  
21 be paid to the public reporting of austerity measures and any subsequent suicide-related  
22 events that may follow. Taking the opportunity to educate the public over these events,  
23 while at the same time avoiding sensational language, unnecessarily explicit details, and  
24 undue repetition of stories, are reasonable approaches to pursue.<sup>45,51-53</sup>  
25  
26  
27

28 It has been argued that the policies of austerity implemented in Greece have been largely  
29 unscientific.<sup>1</sup> Future economic policies, and the public messaging of these policies and  
30 related events, may benefit from the findings documented here.  
31  
32  
33  
34  
35  
36  
37  
38  
39  
40  
41  
42  
43  
44  
45  
46  
47  
48  
49  
50  
51  
52  
53  
54  
55  
56  
57  
58  
59  
60

| Month          | Event type         | Description of Economic Interruption                                                                                                                                                           |
|----------------|--------------------|------------------------------------------------------------------------------------------------------------------------------------------------------------------------------------------------|
| September 1997 | Prosperity-related | International Olympic Committee announces that Greece will host the 2004 Summer Olympic Games                                                                                                  |
| June 2000      | Prosperity-related | Greece is accepted into the Economic and Monetary Union of the European Union (EU)                                                                                                             |
| January 2002   | Prosperity-related | Greece is among the first wave of European countries to launch Euro banknotes and coins                                                                                                        |
| August 2004    | Prosperity-related | Olympic Games are held in Athens, Greece                                                                                                                                                       |
| October 2008   | Austerity-related  | Start of the recession in Greece as marked by the beginning of a sustained percent reduction in national gross domestic product and protesters confronting police, who responded with tear gas |
| March 2010     | Austerity-related  | Greek government announces a series of new austerity measures amid strikes, riots, and protests                                                                                                |
| May 2010       | Austerity-related  | Greek government passes a series of new austerity measures alongside widespread stoppages, protests, riots, and violence                                                                       |
| May 2011       | Austerity-related  | Large organized public protests of austerity measures in multiple major cities across Greece                                                                                                   |
| June 2011      | Austerity-related  | Greek government passes a series of new austerity measures alongside widespread protests, strikes, riots, and violence                                                                         |
| October 2011   | Austerity-related  | Greek government passes a series of new austerity measures alongside widespread protests and strikes                                                                                           |
| February 2012  | Austerity-related  | Greek government passes a series of new austerity measures amid large protests, riots, and violence                                                                                            |
| April 2012     | Austerity-related  | Greek pensioner openly commits highly publicized suicide in the main square of Athens in response to austerity conditions                                                                      |

**Table 1.** Prosperity-related and austerity-related economic events in Greece that were tested as time-series interruptions from 1983-2012.

1  
2  
3  
4  
5  
6  
7  
8  
9  
10  
11  
12  
13  
14  
15  
16  
17  
18  
19  
20  
21  
22  
23  
24  
25  
26  
27  
28  
29  
30  
31  
32  
33  
34  
35  
36  
37  
38  
39  
40  
41  
42  
43  
44  
45  
46  
47  
48  
49  
50  
51  
52  
53  
54  
55  
56  
57  
58  
59  
60

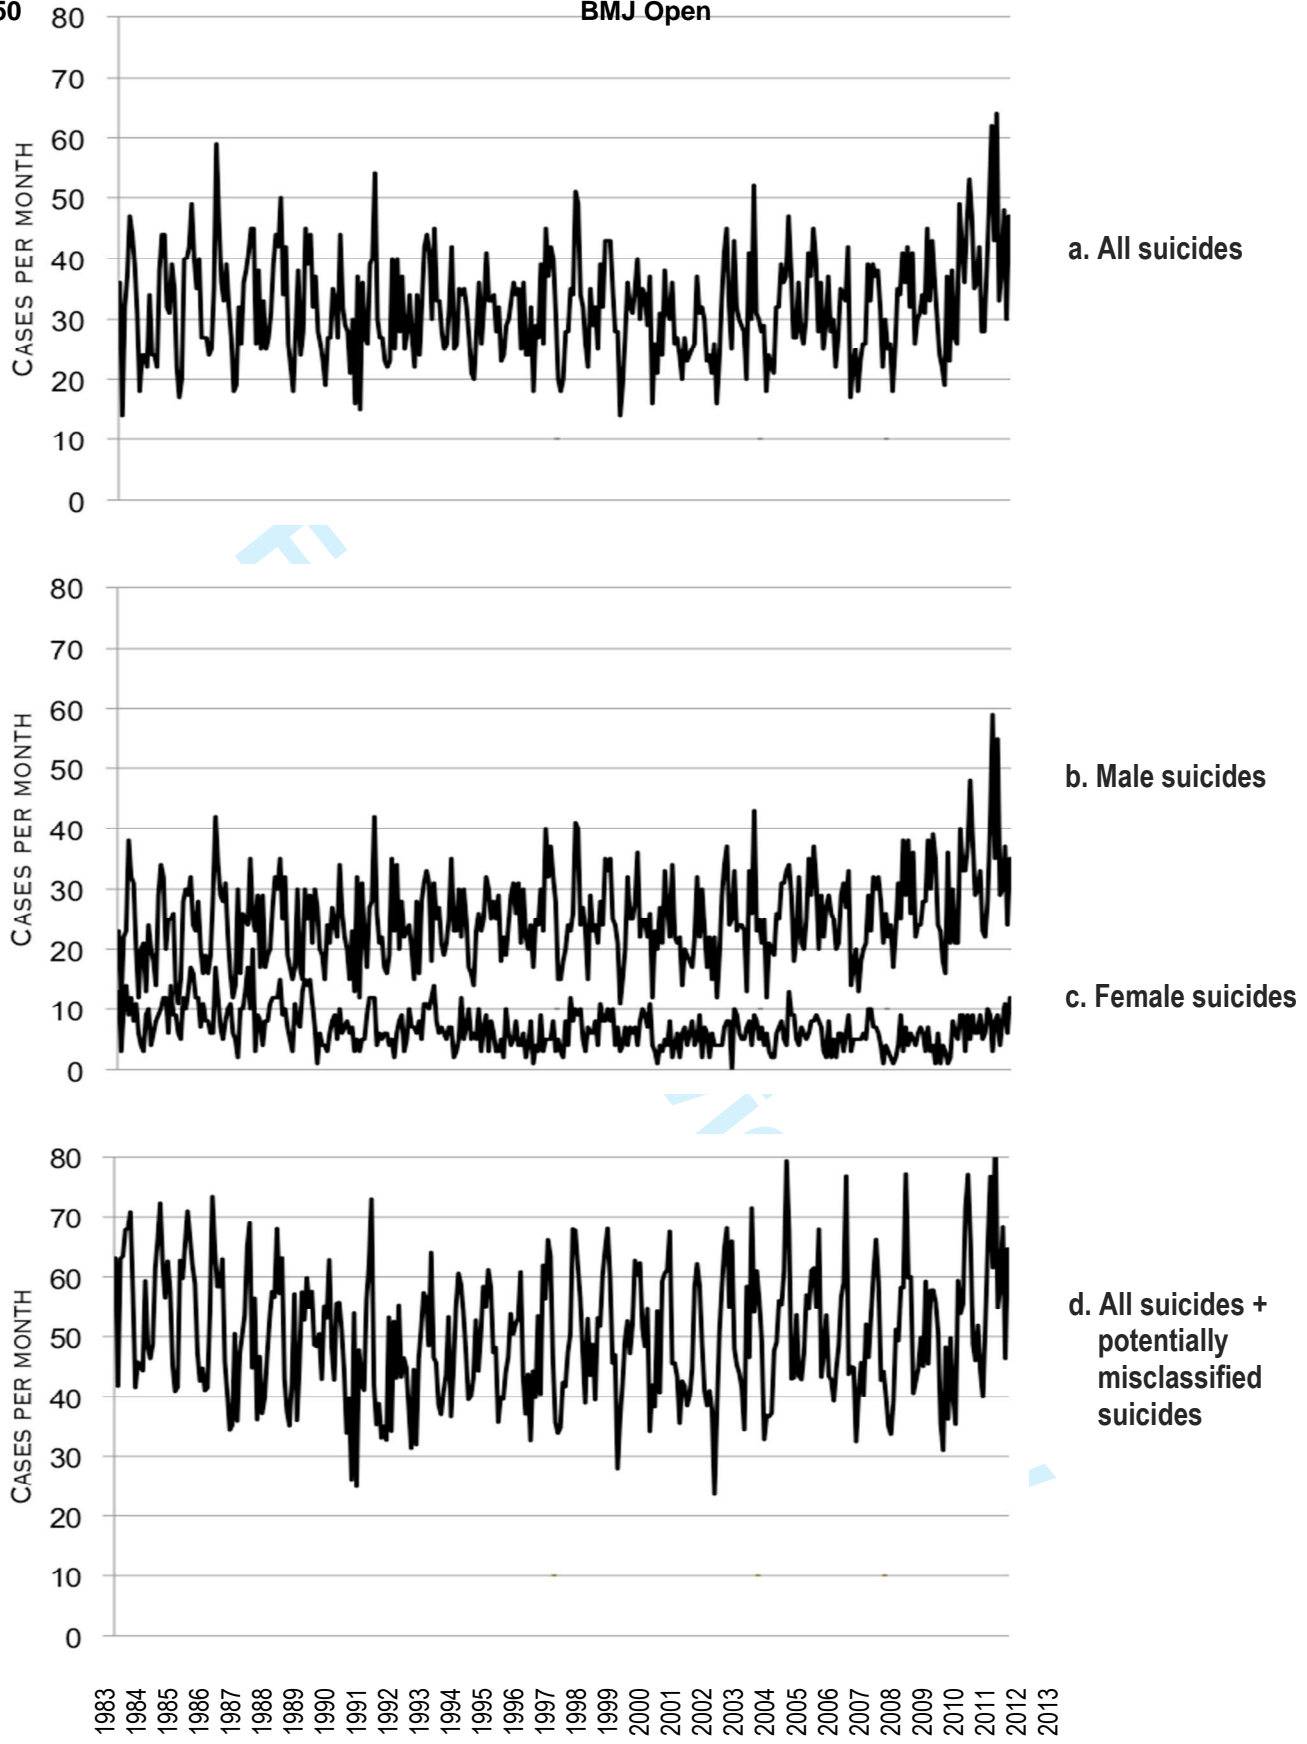

**Figure 1.** Monthly trends in suicide across Greece for all suicides, gender subcategories of suicide, and potentially misclassified suicides.

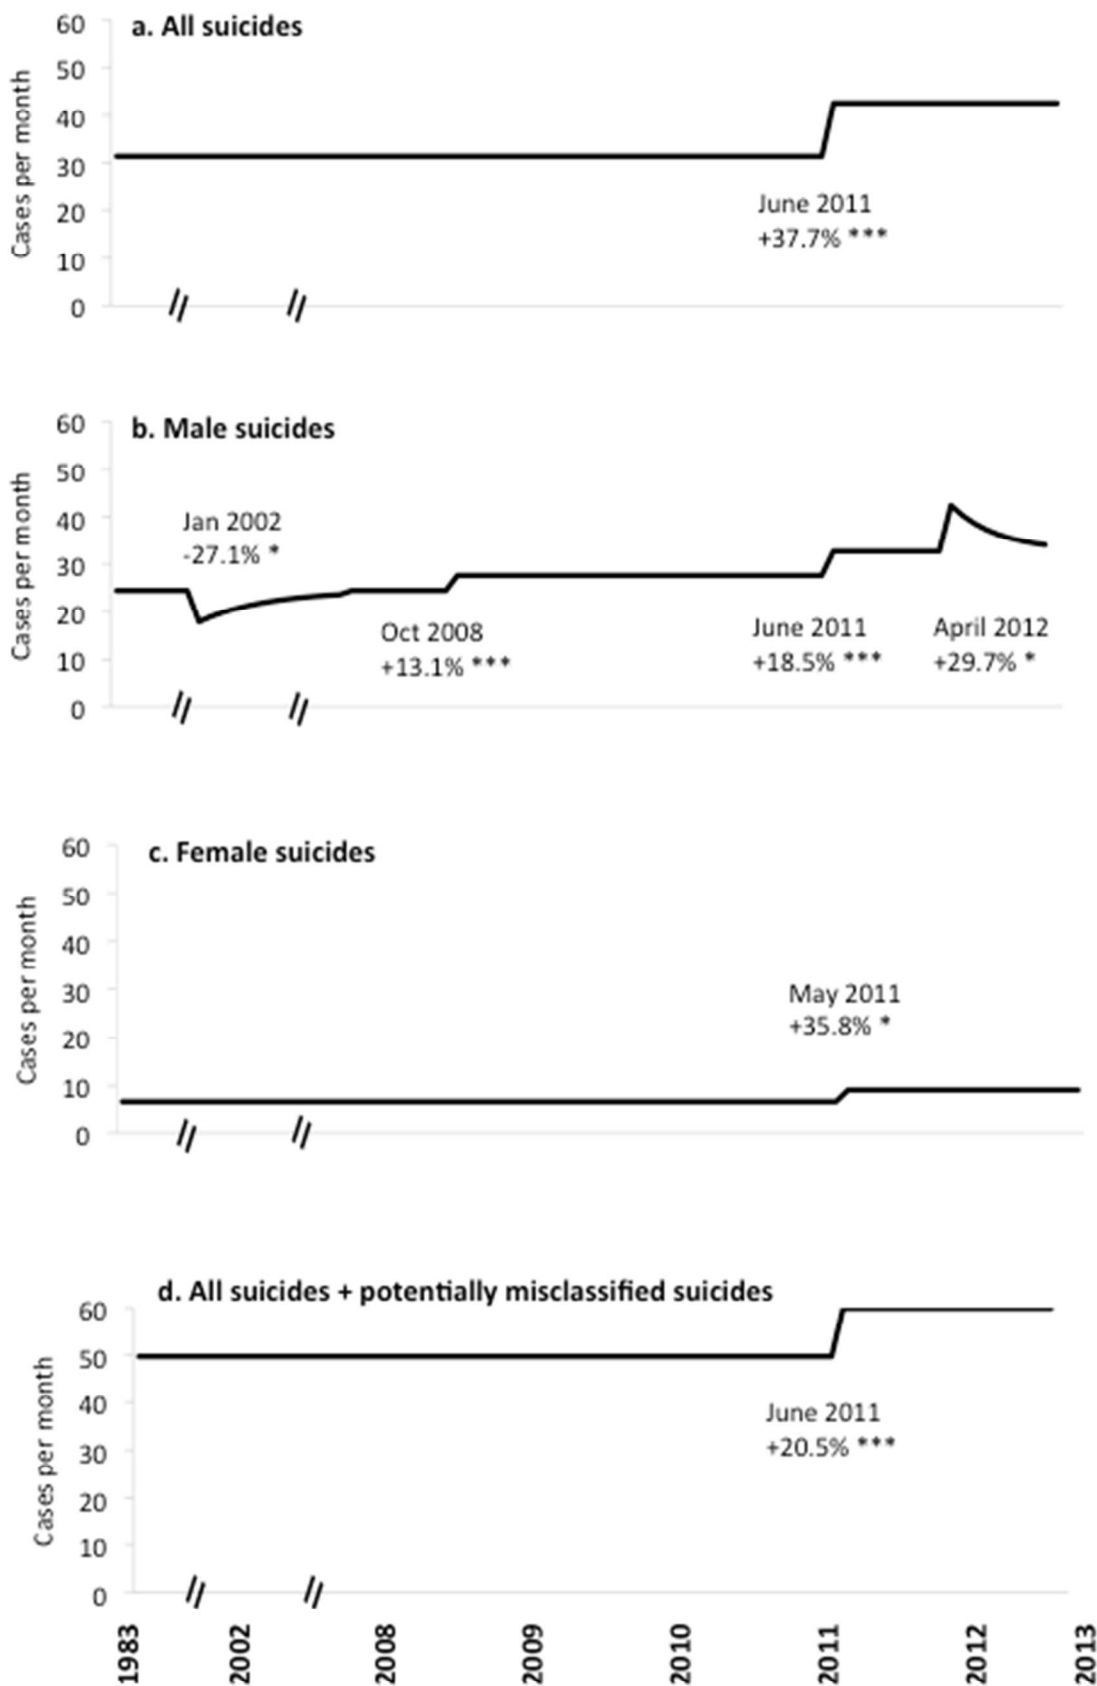

**Figure 2.** Estimated forms (abrupt sustained, abrupt temporary) and magnitudes (%) of statistically significant monthly interruptions in four Greek suicide time series.

\*  $p < 0.05$ , \*\*  $p < 0.01$ , \*\*\*  $p < 0.001$



|                | All suicides     |      |                   |       |                  | Male suicides    |          |                   |          |                  | Female suicides  |        |                   |       |                  | All suicides + potentially misclassified suicides |       |                   |        |                  |
|----------------|------------------|------|-------------------|-------|------------------|------------------|----------|-------------------|----------|------------------|------------------|--------|-------------------|-------|------------------|---------------------------------------------------|-------|-------------------|--------|------------------|
|                | Abrupt permanent |      | Gradual permanent |       | Abrupt temporary | Abrupt permanent |          | Gradual permanent |          | Abrupt temporary | Abrupt permanent |        | Gradual permanent |       | Abrupt temporary | Abrupt permanent                                  |       | Gradual permanent |        | Abrupt temporary |
|                | test             |      | test              |       | test             | test             |          | test              |          | test             | test             |        | test              |       | test             | test                                              |       | test              |        | test             |
|                | Size             | Size | Growth rate       | Size  | Decay rate       | Size             | Size     | Growth rate       | Size     | Decay rate       | Size             | Size   | Growth rate       | Size  | Decay rate       | Size                                              | Size  | Growth rate       | Size   | Decay rate       |
| September 1997 | -.42             | .26  | .42               | 2.21  | .77              | -.16             | -.13     | .44               | .17      | .99              | .15              | .13    | .13               | .07   | .95              | .58                                               | .51   | .37               | .08    | .62              |
| June 2000      | -1.25            | .01  | 1.07              | 2.68  | .78              | .05              | .05      | .64               | .18      | .77              | .87              | -1.79  | .94               | .71   | .45              | .92                                               | 1.38  | .53               | .14    | .88              |
| January 2002   | -.44             | -.51 | -.18              | -.38  | .83              | -.37             | -.77     | -.46              | -6.62*   | .84**            | -.28             | -.21   | .53               | 2.09  | .06              | -1.12                                             | -3.41 | .91               | 1.24   | .45              |
| August 2004    | 1.01             | .51  | .52               | -2.67 | .42              | .71              | .27      | .67               | 1.33     | .82              | .30              | .23    | .59               | .24   | .74              | .13                                               | -.16  | .64               | .33    | 1.01             |
| October 2008   | 1.95             | 3.57 | .78               | 4.43  | .36              | 3.24***          | 5.30     | .65               | 2.01     | .03              | 1.23             | -1.63  | .32               | .43   | .68              | .14                                               | .07   | .82               | .04    | 1.12             |
| March 2010     | 12.31            | .23  | 1.07              | .28   | .62              | -.80             | -.69     | .44               | 10.70    | .07              | -1.30            | -0.79  | .48               | .11   | .50              | -3.42                                             | -3.02 | .32               | 7.78   | .69              |
| May 2010       | .04              | .10  | .59               | 1.50  | .75              | -2.08            | -1.51    | .35               | .15      | .69              | -.82             | -.23   | .78               | .61   | .53              | -4.62                                             | -1.87 | .61               | .63    | 7.28             |
| May 2011       | .48              | .44  | .60               | .39   | .95              | -6.02            | -6.26    | .24               | .01      | .83              | 2.37*            | 4.31*† | .80*†             | 3.43  | .66              | -3.81                                             | -4.27 | .40               | .07    | .94              |
| June 2011      | 11.20***         | 5.87 | .50               | -7.68 | .20              | 5.16***          | 10.42**† | .79**†            | 11.86**† | .89**†           | -3.19            | -5.99  | .67               | -5.68 | .22              | 10.20***                                          | 6.54  | .37               | -6.30  | .14              |
| September 2011 | 1.24             | 1.30 | .21               | 7.33  | .59              | -5.35            | -3.06    | .75               | 8.83     | .12              | 1.31             | 1.83   | .55               | .40   | .89              | 1.46                                              | 1.65  | .45               | 8.98   | .47              |
| February 2012  | 1.69             | 1.39 | .52               | -9.68 | .46              | 8.65             | -3.06    | .75               | -9.03    | .12              | .98              | .56    | .49               | .14   | 1.42             | 2.33                                              | .12   | 1.27              | -10.34 | .61              |
| April 2012     | 4.64             | 2.39 | .42               | .16   | 1.70*            | -9.03            | -9.18    | .04               | 9.81*    | .78**            | .44              | .37    | .43               | .10   | -1.71            | 6.55                                              | 6.67  | .01               | -.22   | .65              |

All suicide model: ARIMA(0,0,0)(0,1,1).<sup>12</sup> Q(24 lags)=13.6. Male suicide model: ARIMA(0,0,0)(0,1,1).<sup>22</sup> Q(24 lags)=21.6.

Female suicide model: ARIMA(1,0,1)(0,1,1).<sup>22</sup> Q(24 lags)=19.8. All suicide + potentially misclassified suicides model: ARIMA(1,0,1)(0,1,1).<sup>22</sup> Q(24 lags)=16.2.

Size: numerator coefficient. Growth rate and decay rate: denominator coefficient. Abrupt permanent test: zero order transfer function applied to step.

Gradual permanent test: first order transfer function applied to step. Abrupt temporary test: first order transfer function applied to pulse.

\*p<0.05, \*\*p<0.01, \*\*\*p<0.001 Boxes indicate interruptions that were statistically significant and retained in final model.

† The coefficient was statistically significant but produced a poorly fitting estimate of the time series and thus was rejected.

**Table 2.** Time-series ARIMA modeling results of the impact of austerity-related and prosperity-related events on four monthly suicide time series studied in Greece from 1983-2012.

## References

1. Kondilis E, Giannakopoulos S, Gavana M, Ierodiakonou I, Waitzkin H, Benos A. Economic crisis, restrictive policies, and the population's health and health care: the Greek case. *Am J Public Health*. 2013;103(6):973-980.
2. Stuckler D, Meissner C, Fishback P, Basu S, McKee M. Banking crises and mortality during the Great Depression: evidence from US urban populations, 1929-1937. *J Epidemiol Commun H*. 2011:1-10.
3. Kentikelenis A, Karanikolos M, Papanicolas I, Basu S, McKee M, Stuckler D. Health effects of financial crisis: omens of a Greek tragedy. *Lancet*. 2011;378:1457-1458.
4. Fountoulakis KN, Koupidis SA, Grammatikopoulos IA, Theodorakis PN. First reliable data suggest a possible increase in suicides in Greece. *BMJ*. 2013;347:1-2.
5. Stuckler D, Basu S, Suhrcke M, Coutts A, McKee M. Effects of the 2008 recession on health: a first look at European data. *Lancet*. 2011;378:124-125.
6. Hyphantis T. The "depression" of mental health care in general hospitals in Greece in the era of recession. *J Psychosomatic Research*. 2013;74:530-532.
7. Fountoulakis KN, Grammatikopoulos IA, Koupidis SA, Siamouli M, Theodorakis PN. Health and the financial crisis in Greece. *Lancet*. 2012;379:1001-1002.
8. Michas G. Suicides in Greece: a light at the end of the tunnel. *BMJ*. 2013;347:f6249.
9. Economou M, Madianos M, Theleritis C, Peppou LE, Stefanis CN. Increased suicidality amid economic crisis in Greece. *Lancet*. 2011;378:1459.
10. Horton R. Offline: Looking forward to some surprises. *Lancet*. 2011;377:2164.
11. Antonakakis N, Collins A. The impact of fiscal austerity on suicide: On the empirics of a modern Greek tragedy. *Social Science & Medicine*. 2014;112(0):39-50.
12. Anonymous. Regulation of the Statistical Obligations of the Agencies of the Hellenic Statistical System (ELSS). Piraeus: Hellenic Republic. Hellenic Statistical Authority.; 2011:1-8.
13. Anonymous. European Statistics Code of Practice for the National and Community Statistical Authorities: European Statistical System Committee; 2011:1-7.
14. Zacharakis CA, Madianos MG, Papadimitriou GN, C.N. S. Suicide in Greece 1980-1995: patterns and social factors. *Soc Psychiatry Psychiatr Epidemiology*. 1998;33:471-476.
15. Värnik P, Sisask M, Värnik A, et al. Suicide registration in eight European countries: A qualitative analysis of procedures and practices. *Forensic Science International*. 2010;202:86-92.
16. Claassen C, Yip P, Corcoran P, Bossarte R, Lawrence B, Currier G. National suicide rates a century after Durkheim: do we know enough to estimate error? *Suicide and Life-Threatening Behavior*. 2010;40:193-223.
17. Warshauer M, Monk M. Problems in suicide statistics for whites and blacks. *American Journal of Public Health*. 1978;68:383-388.
18. Rockett I, Smith G. Suicide misclassification in an international context. . Paper presented at: Proceedings of the International Collaborative Effort on Injury Statistics 1995; Hyattsville, Maryland, USA.
19. Chang S, Stuckler D, Yip P, Gunnell D. Impact of 2008 global economic crisis on suicide: time trend study in 54 countries. *BMJ*. 2013;17:347-362.
20. Branas CC, Nance ML, Elliott MR, Richmond TS, Schwab CW. Urban-rural shifts in intentional firearm death: different causes, same results. *Am J Public Health*. Oct 2004;94(10):1750-1755.
21. Rockett I, McKinley T. Reliability and sensitivity of suicide certification in higher-income countries. *Suicide Life-Threatening Behavior*. 1999;29:141-149.
22. Stylianidou S. Terminal cancer patients and euthanasia — The church's position. *Hellenic Journal of Surgery*. 2013;85(2):105-108.

- 1  
2  
3 23. Kentikelenis A, Karanikolos M, Papanicolas I, Basu S, McKee M, Stuckler D. Health and the financial  
4 crisis in Greece — Authors' reply. *Lancet*. 2012;379:1002.
- 5 24. Kastanaki AE, Kranioti EF, Theodorakis PN, Papadomanolakis A, Michalodimitrakis M. Accuracy of  
6 official suicide mortality statistics in Greece: findings from the Island of Crete. *9th Annual Meeting  
7 of the Balkan Academy of Forensic Sciences (BAFS)*. Istanbul, Turkey 2013:31.
- 8 25. Ifanti AA, Argyriou AA, Kalofonou FH, Kalofonos HP. Financial crisis and austerity measures in  
9 Greece: their impact on health promotion policies and public health care. *Health Policy*.  
10 2013;13:154-168.
- 11 26. Anonymous. Quarterly national accounts: 2nd Quarter 2013 (Provisional).  
12 [http://www.statistics.gr/portal/page/portal/ESYE/BUCKET/A0704/PressReleases/A0704\\_SEL8  
13 4\\_DT\\_QQ\\_02\\_2013\\_01\\_P\\_EN.pdf](http://www.statistics.gr/portal/page/portal/ESYE/BUCKET/A0704/PressReleases/A0704_SEL84_DT_QQ_02_2013_01_P_EN.pdf); Hellenic Statistical Authority; 2013.
- 14 27. Wearden G. Greece debt crisis: timeline. *The Guardian*. May 5, 2010.
- 15 28. Anonymous. Timeline: Greece's economic crisis. *Reuters*. Feb 3 and Mar 11, 2010.
- 16 29. Klimes M. Timeline: Greek austerity strikes and protests. *International Business Times*. Nov 6,  
17 2013.
- 18 30. Anonymous. More riots in Greece over fatal police shooting of teen. *USA Today*. Dec 7, 2008.
- 19 31. Box GEP, Jenkins GM. *Time-Series Analysis: Forecasting and Control*. San Francisco: Holden-Day;  
20 1976.
- 21 32. McCleary R, Hay R, Jr. *Applied time series analysis for the social sciences*. Beverly Hills: Sage; 1980.
- 22 33. McDowall D, McCleary R. *Interrupted Time Series Analysis*. Vol 21. London: Sage Publishing; 1980.
- 23 34. OECD. *Country statistical profile: Greece 2013/2*.
- 24 35. Hellenic-Statistical-Authority. Press Release - Vital Statistics 2012. In: Division of Population and  
25 Labour Market Statistics, ed. Piraeus, Greece: Vital and Migration Statistics Section 2013.
- 26 36. World-Bank. *Life expectancy at birth, total (years) 2014*.
- 27 37. Index-Mundi. Greece - Life expectancy at birth. 2014;  
28 <http://www.indexmundi.com/facts/greece/life-expectancy-at-birth>.
- 29 38. Index-Mundi. Greece Unemployment rate. 2014;  
30 [http://www.indexmundi.com/greece/unemployment\\_rate.html](http://www.indexmundi.com/greece/unemployment_rate.html).
- 31 39. Evans-Pritchard A, Mason R. Investors shun Greek debt as shipping crisis deepens. *The Telegraph*.  
32 October 2008.
- 33 40. CNN-Europe. Explainer: Why is there unrest in Greece? *CNN*. December 10, 2008.
- 34 41. Stack S. Suicide: A 15-Year Review of the Sociological Literature Part I: Cultural and Economic  
35 Factors. *Suicide and Life-Threatening Behavior*. 2000;30(2):145-162.
- 36 42. Marshall JR, Hodge RW. Durkheim and pierce on suicide and economic change. *Social Science  
37 Research*. 1981;10(2):101-114.
- 38 43. Lopez Bernal JA, Gasparrini A, Artundo CM, McKee M. The effect of the late 2000s financial crisis  
39 on suicides in Spain: an interrupted time-series analysis. *European J Public Health*.  
40 2013;23(5):732-736.
- 41 44. Kondilis E, Ierodiakonou I, Gavana M. Suicide mortality and economic crisis in Greece: men's  
42 Achilles heel. *J Epidemiology Community Health*. 2013;67:e1.
- 43 45. Niederkrotenthaler T, Voracek M, Herberth A, et al. Role of media reports in completed and  
44 prevented suicide: Werther v. Papageno effects. *British Journal of Psychiatry*. 2010;197:234-243.
- 45 46. Kastanaki AE, Kranioti EF, Papavdi A, Theodorakis PN, Michalodimitrakis M. Suicide by firearms  
46 on the island of Crete. *Crisis*. 2010;31(1):43-52.
- 47 47. Kastanaki AE, Kranioti EF, Theodorakis PN, Michalodimitrakis M. Patterns of suicide in Cretan  
48 women. In: Vieira DN BA, Cusack D, Beth P, editors, ed. *Acta Medicinae Legalis et Socialis*: Coimbra  
49 University Press; 2010:157-164.

- 1  
2  
3  
4 48. Faresjo A, Theodorsson E, Chatziarzenis M, et al. Higher Perceived Stress but Lower Cortisol  
5 Levels Found among Young Greek Adults Living in a Stressful Social Environment in Comparison  
6 with Swedish Young Adults. *Plos One*. 2013;8(9):1-8.
- 7 49. Simou E, Koutsogeorgou E. Effects of the economic crisis on health and healthcare in Greece in the  
8 literature from 2009 to 2013: A systematic review. *Health Policy*. 2014;115(2-3):111-119.
- 9 50. Madianos M, Economou M, Alexiou T, Stefanis C. Depression and economic hardship across Greece  
10 in 2008 and 2009: two cross-sectional surveys nationwide. *Soc Psychiatry Psychiatr Epidemiology*.  
11 2011;46:943-952.
- 12 51. O'Toole ME. A different perspective on the UCSB mass murder. *Violence and gender*. 2014;1(2):49-  
13 50.
- 14 52. Pirkis J, Francis C, Blood R, et al. Reporting of suicide in the Australian media. *Aust N Z J Psychiatry*.  
15 2002;36:190-197.
- 16 53. World-Health-Organization. Preventing suicide. A resource for media professionals. In: Report-of-  
17 WHO-Department-of-Mental-Health-and-Substance-Abuse, ed. Geneva, Switzerland: WHO Library;  
18 2008:1-18.
- 19  
20  
21  
22  
23  
24  
25  
26  
27  
28  
29  
30  
31  
32  
33  
34  
35  
36  
37  
38  
39  
40  
41  
42  
43  
44  
45  
46  
47  
48  
49  
50  
51  
52  
53  
54  
55  
56  
57  
58  
59  
60

1  
2  
3  
4  
5  
6  
7  
8  
9  
10  
11  
12  
13  
14  
15  
16  
17  
18  
19  
20  
21  
22  
23  
24  
25  
26  
27  
28  
29  
30  
31  
32  
33  
34  
35  
36  
37  
38  
39  
40  
41  
42  
43  
44  
45  
46  
47  
48  
49  
50  
51  
52  
53  
54  
55  
56  
57  
58  
59  
60

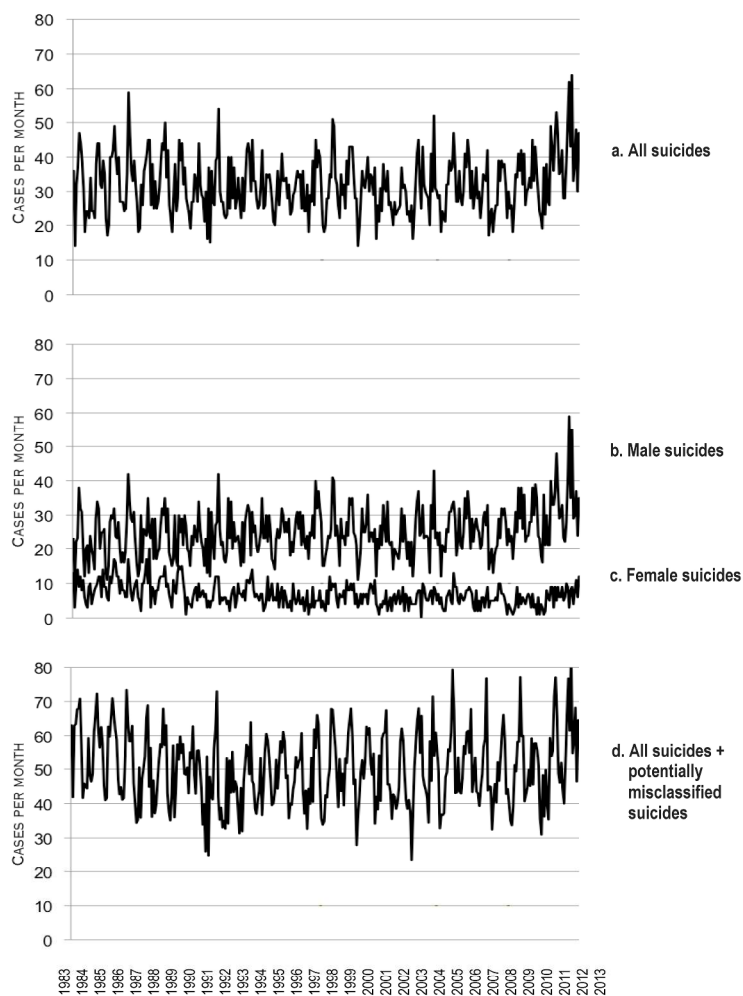

279x361mm (300 x 300 DPI)

1  
2  
3  
4  
5  
6  
7  
8  
9  
10  
11  
12  
13  
14  
15  
16  
17  
18  
19  
20  
21  
22  
23  
24  
25  
26  
27  
28  
29  
30  
31  
32  
33  
34  
35  
36  
37  
38  
39  
40  
41  
42  
43  
44  
45  
46  
47  
48  
49  
50  
51  
52  
53  
54  
55  
56  
57  
58  
59  
60

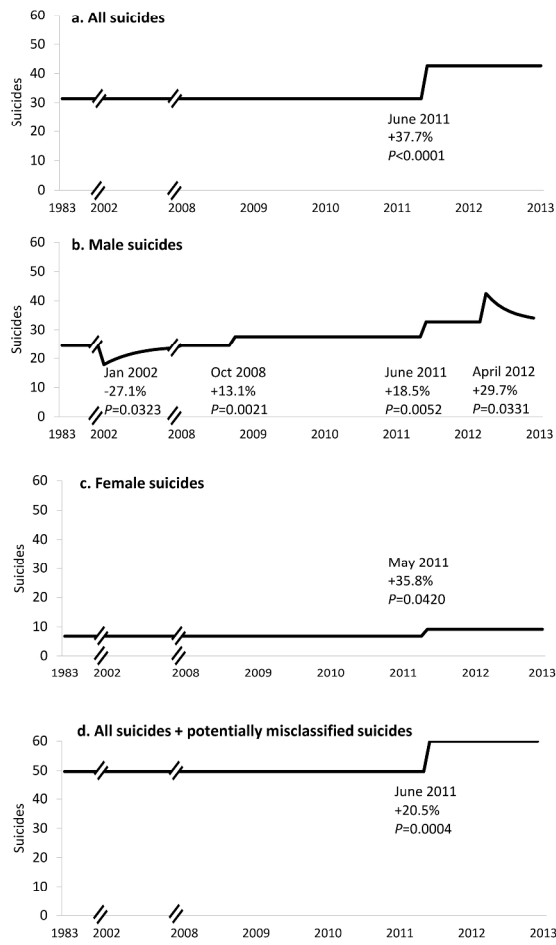

279x361mm (300 x 300 DPI)

1  
2  
3 **Appendix. ARIMA models**  
4

5  
6 A) All suicides ARIMA model  $(0,0,1)(0,1,1)_{12}$   
7

8  
9 
$$(1 - B^{12})y_t = \vartheta + (1 - \theta_{12}B^{12})a_t$$
  
10

11  
12 B) Male suicides ARIMA model  $(0,0,0)(0,1,1)_{12}$   
13

14  
15 
$$(1 - B^{12})y_t = \vartheta + (1 - \theta_{12}B^{12})a_t$$
  
16

17  
18  
19 C) Female suicides ARIMA model  $(1,0,1)(0,1,1)_{12}$   
20

21  
22 
$$(1 - B^{12})y_t = \vartheta + \frac{(1 - \theta_1 B)(1 - \theta_{12} B^{12})}{(1 - \phi_1 B)} a_t$$
  
23  
24

25  
26 D) All suicides + potentially misclassified suicides  
27 ARIMA model  $(1,0,1)(0,1,1)_{12}$   
28

29  
30  
31 
$$(1 - B^{12})y_t = \vartheta + \frac{(1 - \theta_1 B)(1 - \theta_{12} B^{12})}{(1 - \phi_1 B)} a_t$$
  
32  
33

34  
35 **FINAL MODELS**  
36

37  
38 
$$U_t = W_t + f(I_t)$$
  
39

40  
41 where

42 
$$W_t = Y_t - Y_{t-12}$$
  
43

44 and  $f(I_t)$  is the intervention component of the model  
45

46  
47 **Intervention components**  
48

49  
50 a) Abrupt sustained

51 
$$f(I_t) = \omega_0 I_t$$
  
52

53  
54 where  $I_t$  is a step function such that

55  $I_t = 0$  prior to the event

56  $= 1$  thereafter  
57  
58  
59  
60

b) Gradual sustained

$$f(I_t) = \frac{\omega_0}{1 - \delta_1 B} I_t$$

where  $I_t$  is a step function such that

$$I_t = 0 \text{ prior to the event} \\ = 1 \text{ thereafter}$$

c) Abrupt temporary

$$f(I_t) = \frac{\omega_0}{1 - \delta_1 B} (1 - B) I_t$$

where  $I_t$  is a pulse function such that

$$I_t = 0 \text{ prior to the intervention} \\ = 1 \text{ at the moment of the intervention} \\ = 0 \text{ thereafter}$$

## ARIMA Models Including Intervention Component

A) All suicides

$$U_t = \vartheta + (1 - \theta_{12} B^{12}) a_t + \omega_0 I_{342}$$

B) Male suicides

$$U_t = \vartheta + (1 - \theta_{12} B^{12}) a_t + \omega_0 I_{310} + \omega_0 I_{342} + \frac{\omega_0}{1 - \delta_1 B} (1 - B) I_{352}$$

C) Female suicides

$$U_t = \vartheta + \frac{(1 - \theta_1 B)(1 - \theta_{12} B^{12})}{(1 - \phi_1 B)} a_t + \omega_0 I_{341}$$

D) All suicides + potentially misclassified suicides

$$U_t = \vartheta + \frac{(1 - \theta_1 B)(1 - \theta_{12} B^{12})}{(1 - \phi_1 B)} a_t + \omega_0 I_{353}$$



## References

1. Kondilis E, Giannakopoulos S, Gavana M, Ierodiakonou I, Waitzkin H, Benos A. Economic crisis, restrictive policies, and the population's health and health care: the Greek case. *Am J Public Health*. 2013;103(6):973-980.
2. Stuckler D, Meissner C, Fishback P, Basu S, McKee M. Banking crises and mortality during the Great Depression: evidence from US urban populations, 1929-1937. *J Epidemiol Commun H*. 2011:1-10.
3. Kentikelenis A, Karanikolos M, Papanicolas I, Basu S, McKee M, Stuckler D. Health effects of financial crisis: omens of a Greek tragedy. *Lancet*. 2011;378:1457-1458.
4. Fountoulakis KN, Koupidis SA, Grammatikopoulos IA, Theodorakis PN. First reliable data suggest a possible increase in suicides in Greece. *BMJ*. 2013;347:1-2.
5. Stuckler D, Basu S, Suhrcke M, Coutts A, McKee M. Effects of the 2008 recession on health: a first look at European data. *Lancet*. 2011;378:124-125.
6. Hyphantis T. The "depression" of mental health care in general hospitals in Greece in the era of recession. *J Psychosomatic Research*. 2013;74:530-532.
7. Fountoulakis KN, Grammatikopoulos IA, Koupidis SA, Siamouli M, Theodorakis PN. Health and the financial crisis in Greece. *Lancet*. 2012;379:1001-1002.
8. Economou M, Madianos M, Theleritis C, Peppou LE, Stefanis CN. Increased suicidality amid economic crisis in Greece. *Lancet*. 2011;378:1459.
9. Horton R. Offline: Looking forward to some surprises. *Lancet*. 2011;377:2164.
10. Anonymous. Regulation of the Statistical Obligations of the Agencies of the Hellenic Statistical System (ELSS). Piraeus: Hellenic Republic. Hellenic Statistical Authority.; 2011:1-8.
11. Anonymous. European Statistics Code of Practice for the National and Community Statistical Authorities: European Statistical System Committee; 2011:1-7.
12. Zacharakis CA, Madianos MG, Papadimitriou GN, C.N. S. Suicide in Greece 1980-1995: patterns and social factors. *Soc Psychiatry Psychiatr Epidemiology*. 1998;33:471-476.
13. Värnik P, Sisask M, Värnik A, et al. Suicide registration in eight European countries: A qualitative analysis of procedures and practices. *Forensic Science International*. 2010;202:86-92.
14. Claassen C, Yip P, Corcoran P, Bossarte R, Lawrence B, Currier G. National suicide rates a century after Durkheim: do we know enough to estimate error? *Suicide and Life-Threatening Behavior*. 2010;40:193-223.
15. Warshauer M, Monk M. Problems in suicide statistics for whites and blacks. *American Journal of Public Health*. 1978;68:383-388.
16. Rockett I, Smith G. Suicide misclassification in an international context. . Paper presented at: Proceedings of the International Collaborative Effort on Injury Statistics 1995; Hyattsville, Maryland, USA.
17. Chang S, Stuckler D, Yip P, Gunnell D. Impact of 2008 global economic crisis on suicide: time trend study in 54 countries. *BMJ*. 2013;17:347-362.
18. Branäs CC, Nance ML, Elliott MR, Richmond TS, Schwab CW. Urban-rural shifts in intentional firearm death: different causes, same results. *Am J Public Health*. Oct 2004;94(10):1750-1755.
19. Rockett I, McKinley T. Reliability and sensitivity of suicide certification in higher-income countries. *Suicide Life-Threatening Behavior*. 1999;29:141-149.
20. Stylianidou S. Terminal cancer patients and euthanasia — The church's position. *Hellenic Journal of Surgery*. 2013;85(2):105-108.
21. Kentikelenis A, Karanikolos M, Papanicolas I, Basu S, McKee M, Stuckler D. Health and the financial crisis in Greece — Authors' reply. *Lancet*. 2012;379:1002.

- 1  
2  
3  
4  
5  
6  
7  
8  
9  
10  
11  
12  
13  
14  
15  
16  
17  
18  
19  
20  
21  
22  
23  
24  
25  
26  
27  
28  
29  
30  
31  
32  
33  
34  
35  
36  
37  
38  
39  
40  
41  
42  
43  
44  
45  
46  
47  
48  
49  
50  
51  
52  
53  
54  
55  
56  
57  
58  
59  
60
22. Kastanaki AE, Kranioti EF, Theodorakis PN, Papadomanolakis A, Michalodimitrakis M. Accuracy of official suicide mortality statistics in Greece: findings from the Island of Crete. *9th Annual Meeting of the Balkan Academy of Forensic Sciences (BAFS)*. Istanbul, Turkey 2013:31.
  23. Ifanti AA, Argyriou AA, Kalofonou FH, Kalofonos HP. Financial crisis and austerity measures in Greece: their impact on health promotion policies and public health care. *Health Policy*. 2013;13:154-168.
  24. Anonymous. Quarterly national accounts: 2nd Quarter 2013 (Provisional). [http://www.statistics.gr/portal/page/portal/ESYE/BUCKET/A0704/PressReleases/A0704\\_SEL84\\_DT\\_QQ\\_02\\_2013\\_01\\_P\\_EN.pdf](http://www.statistics.gr/portal/page/portal/ESYE/BUCKET/A0704/PressReleases/A0704_SEL84_DT_QQ_02_2013_01_P_EN.pdf); Hellenic Statistical Authority; 2013.
  25. Wearden G. Greece debt crisis: timeline. *The Guardian*. May 5, 2010.
  26. Anonymous. Timeline: Greece's economic crisis. *Reuters*. Feb 3 and Mar 11, 2010.
  27. Klimes M. Timeline: Greek austerity strikes and protests. *International Business Times*. Nov 6, 2013.
  28. Anonymous. More riots in Greece over fatal police shooting of teen. *USA Today*. Dec 7, 2008.
  29. McCleary R, Hay R. *Applied time series analysis for the social sciences*. Beverly Hills: Sage Publishing; 1980.
  30. McDowall D, McCleary R. *Interrupted Time Series Analysis*. Vol 21. London: Sage Publishing; 1980.
  31. Lopez Bernal JA, Gasparrini A, Artundo CM, McKee M. The effect of the late 2000s financial crisis on suicides in Spain: an interrupted time-series analysis. *European J Public Health*. 2013;23(5):732-736.
  32. Kondilis E, Ierodiakonou I, Gavana M. Suicide mortality and economic crisis in Greece: men's Achilles heel. *J Epidemiology Community Health*. 2013;67:e1.
  33. Kastanaki AE, Kranioti EF, Papavdi A, Theodorakis PN, Michalodimitrakis M. Suicide by firearms on the island of Crete. *Crisis*. 2010;31(1):43-52.
  34. Kastanaki AE, Kranioti EF, Theodorakis PN, Michalodimitrakis M. Patterns of suicide in Cretan women. In: Vieira DN BA, Cusack D, Beth P, editors, ed. *Acta Medicinae Legalis et Socialis*: Coimbra University Press; 2010:157-164.
  35. Faresjo A, Theodorsson E, Chatziarzenis M, et al. Higher Perceived Stress but Lower Cortisol Levels Found among Young Greek Adults Living in a Stressful Social Environment in Comparison with Swedish Young Adults. *Plos One*. 2013;8(9):1-8.
  36. Madianos M, Economou M, Alexiou T, Stefanis C. Depression and economic hardship across Greece in 2008 and 2009: two cross-sectional surveys nationwide. *Soc Psychiatry Psychiatr Epidemiology*. 2011;46:943-952.
  37. Michas G. Suicides in Greece: a light at the end of the tunnel. *BMJ*. 2013;347:f6249.
  38. Christensen H, Farrer L, Batterham PJ, Mackinnon A, Griffiths KM, Donker T. The effect of a web-based depression intervention on suicide ideation: secondary outcome from a randomised controlled trial in a helpline. *BMJ Open*. 2013;3(6):1-9.
  39. Niederkrotenthaler T, Voracek M, Herberth A, Till B, Strauss M, Etzersdorfer E, Eisenwort B, Sonneck G. Role of media reports in completed and prevented suicide: Werther v. Papageno effects. *British Journal of Psychiatry*. 2010;197:234-243
  40. Pirkis J, Francis C, Blood RW, Burgess B, Morley B, Stewart A, Putnis P. Reporting of suicide in the Australian media. *Aust N Z J Psychiatry* 2002; 36:190-7.
